# Supplementary material for: Rawal's catalyst as an effective stimulant for the highly asymmetric Michael addition of β-keto esters to functionally rich nitro-olefins
Source: Royal Society of Chemistry journal article supplement (doi:10.1039/c5ob02178b), 2015-11-13

## Supporting Information-III

# Rawal's Catalyst as an Effective Stimulant for the Highly Asymmetric Michael Addition of $\beta$ -Keto Esters to Functionally Rich Nitro-olefins

**A. Suresh Kumar, T. Prabhakar Reddy, R. Madhavachary, and Dhevalapally B. Ramachary\***

*Catalysis Laboratory, School of Chemistry, University of Hyderabad, Central University (P.O.),*

*Hyderabad 500 046, India*

*E-mail: [ramsc@uohyd.ernet.in](mailto:ramsc@uohyd.ernet.in) or [ramchary.db@gmail.com](mailto:ramchary.db@gmail.com)*

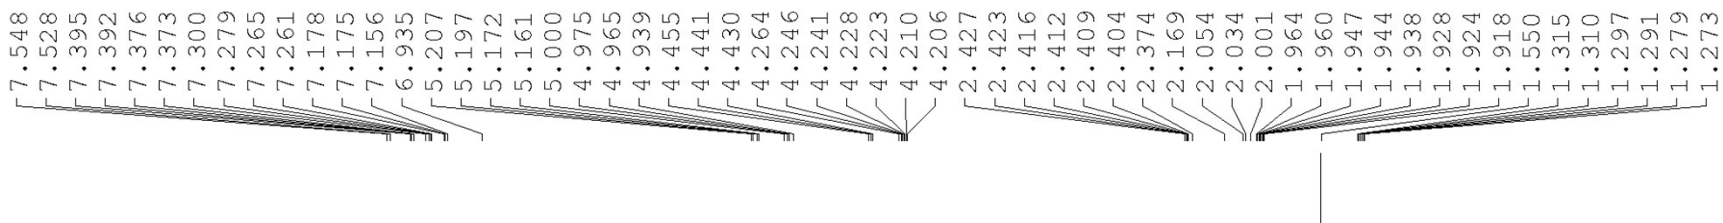

— 213.03

— 169.44

— 153.99

— 137.09  
— 130.19  
— 128.61  
— 127.48  
— 127.21  
— 125.80

— 80.37  
— 77.25  
— 77.02  
— 76.94  
— 76.62  
— 63.00  
— 62.27

— 38.53  
— 37.68  
— 31.43  
— 28.31

— 19.38  
— 13.83

7.555  
7.535  
7.418  
7.399  
7.305  
7.300  
7.285  
7.279  
7.265  
7.262  
7.175  
7.156  
7.137  
6.958  
5.178  
5.167  
5.143  
5.132  
5.113  
5.098  
5.082  
5.066  
5.051  
4.989  
4.964  
4.954  
4.929  
4.478  
4.468  
4.453  
4.442  
2.439  
2.425  
2.407  
2.395  
2.379  
2.363  
2.351  
2.346  
2.173  
2.150  
2.127  
2.103  
2.081  
2.070  
2.049  
2.029  
2.016  
1.997  
1.980  
1.960  
1.946  
1.941  
1.937  
1.925  
1.553  
1.286  
1.271

—213.06

—168.90

—153.97

137.12  
130.20  
128.59  
127.50  
127.17  
125.74

80.32  
77.24  
77.03  
76.93  
76.61  
70.32  
63.14

38.47  
37.66  
31.42  
28.32  
21.47  
21.34  
19.40



7.598  
7.579  
7.457  
7.439  
7.420  
7.405  
7.400  
7.388  
7.369  
7.353  
7.335  
7.326  
7.319  
7.300  
7.277  
7.199  
7.180  
7.161  
5.263  
5.148  
5.138  
5.113  
5.102  
5.074  
5.058  
5.043  
4.962  
4.937  
4.927  
4.901  
4.483  
4.473  
4.458  
4.448  
2.420  
2.404  
2.401  
2.386  
2.373  
2.337  
2.325  
2.322  
2.317  
2.041  
2.018  
2.008  
1.995  
1.987  
1.974  
1.954  
1.895  
1.877  
1.857  
1.844  
1.256  
1.246  
1.240  
1.231

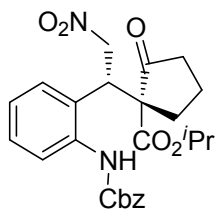

**4bb**

Product-4bb

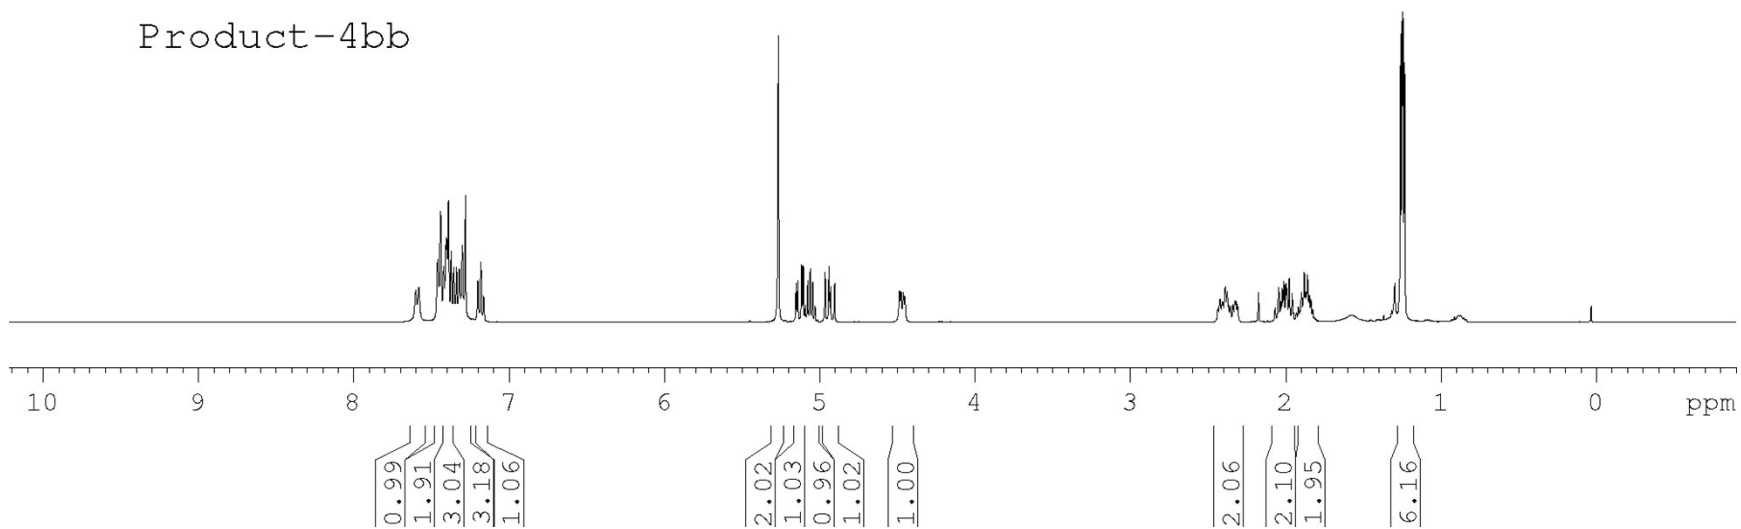

— 213.18

— 168.83

— 154.61

136.70

136.50

130.04

128.76

128.46

128.12

128.07

127.59

126.93

126.00

77.27

76.96

76.91

76.64

70.44

67.04

63.19

38.50

37.59

31.27

21.43

21.29

19.35

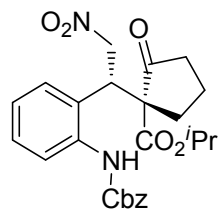

**4bb**

Product-4bb

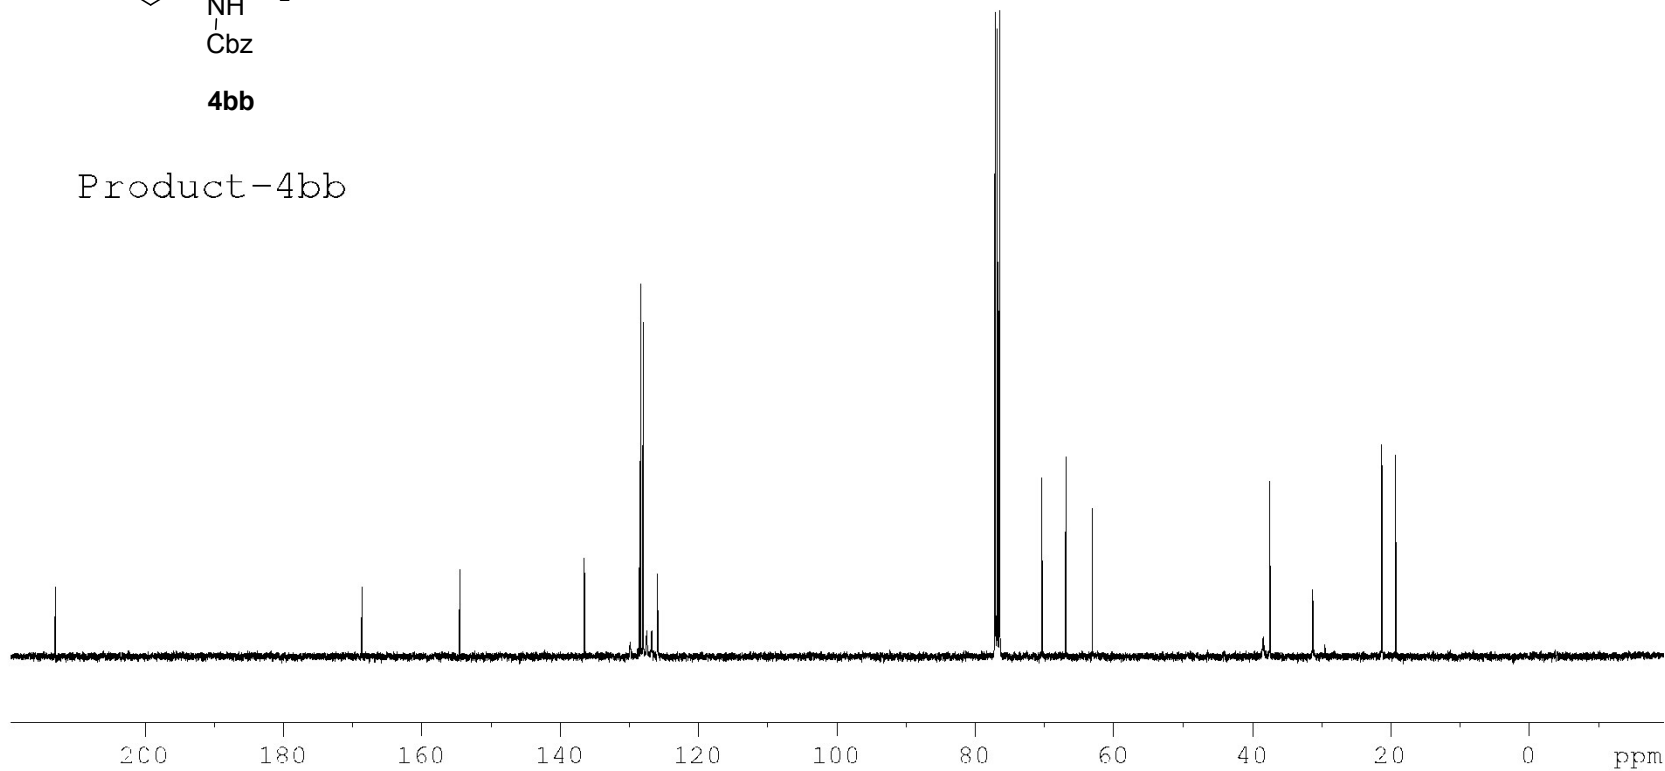

7.588  
7.568  
7.404  
7.401  
7.384  
7.382  
7.301  
7.298  
7.278  
7.263  
7.259  
7.174  
7.171  
7.155  
7.153  
7.136  
7.133  
5.132  
5.121  
5.097  
5.086  
5.079  
5.063  
5.048  
4.942  
4.917  
4.907  
4.882  
4.511  
4.501  
4.486  
4.475  
4.284  
4.280  
4.267  
4.262  
4.249  
4.245  
4.231  
4.227  
2.448  
2.415  
2.402  
2.082  
2.062  
2.059  
2.029  
2.009  
1.948  
1.928  
1.906  
1.356  
1.338  
1.320  
1.272  
1.260  
1.257  
1.245

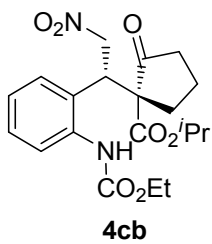

Product-cb

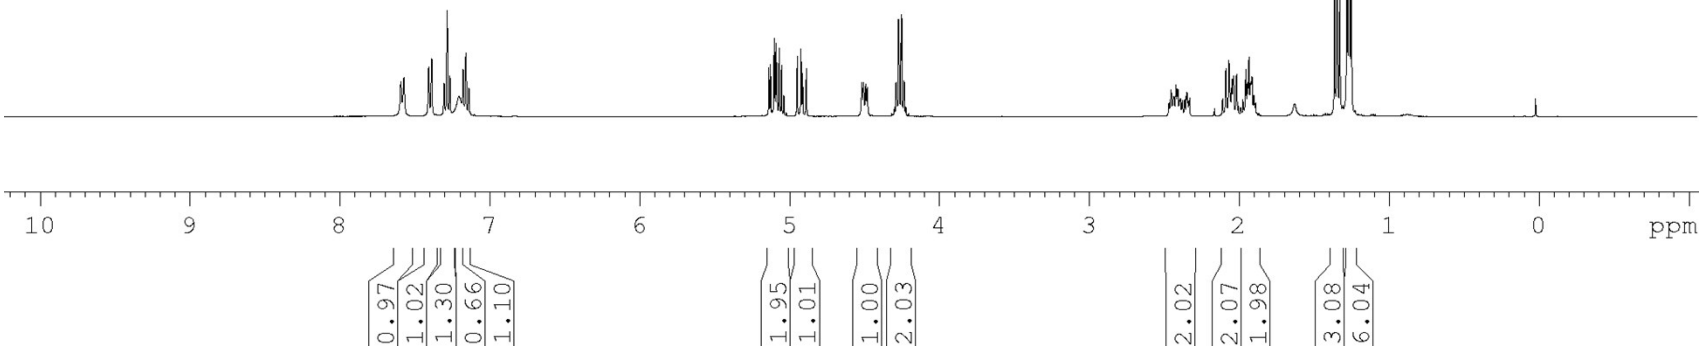



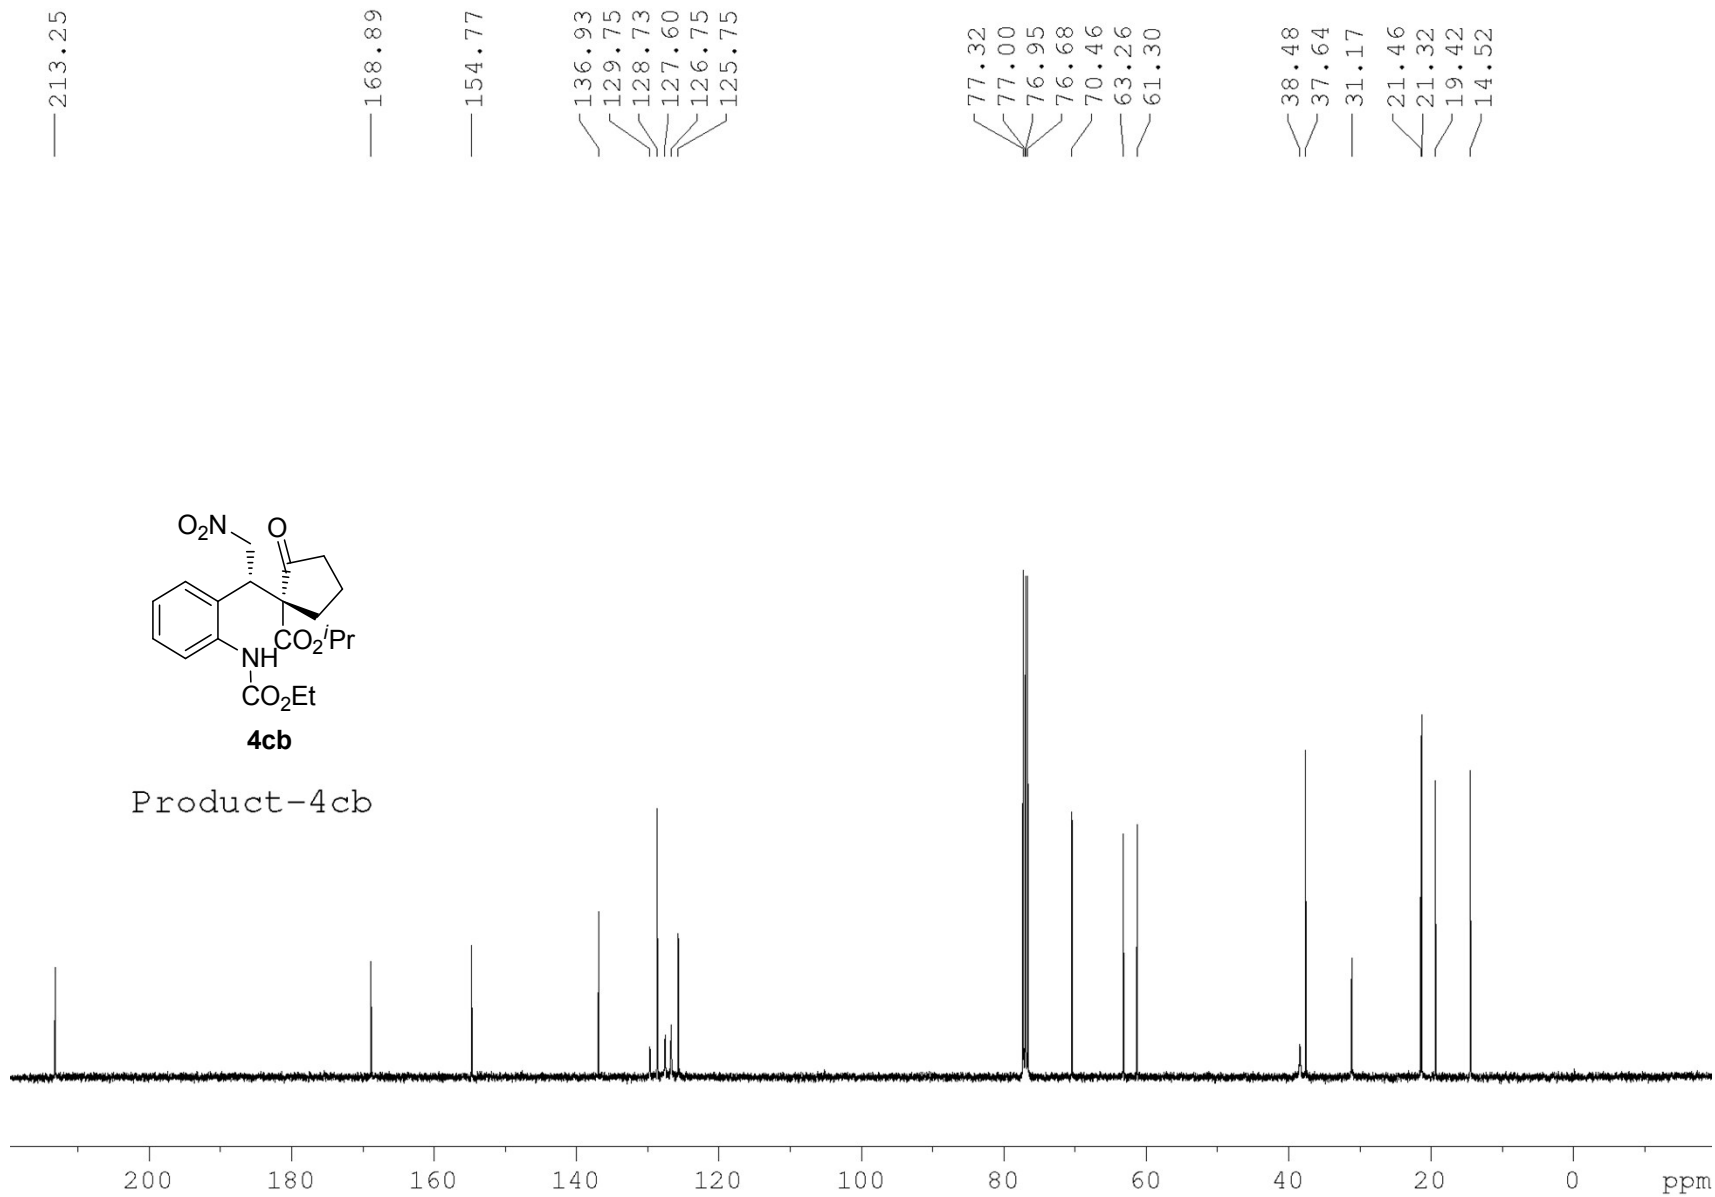

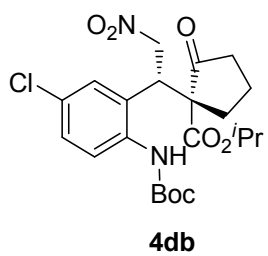

Product-4db

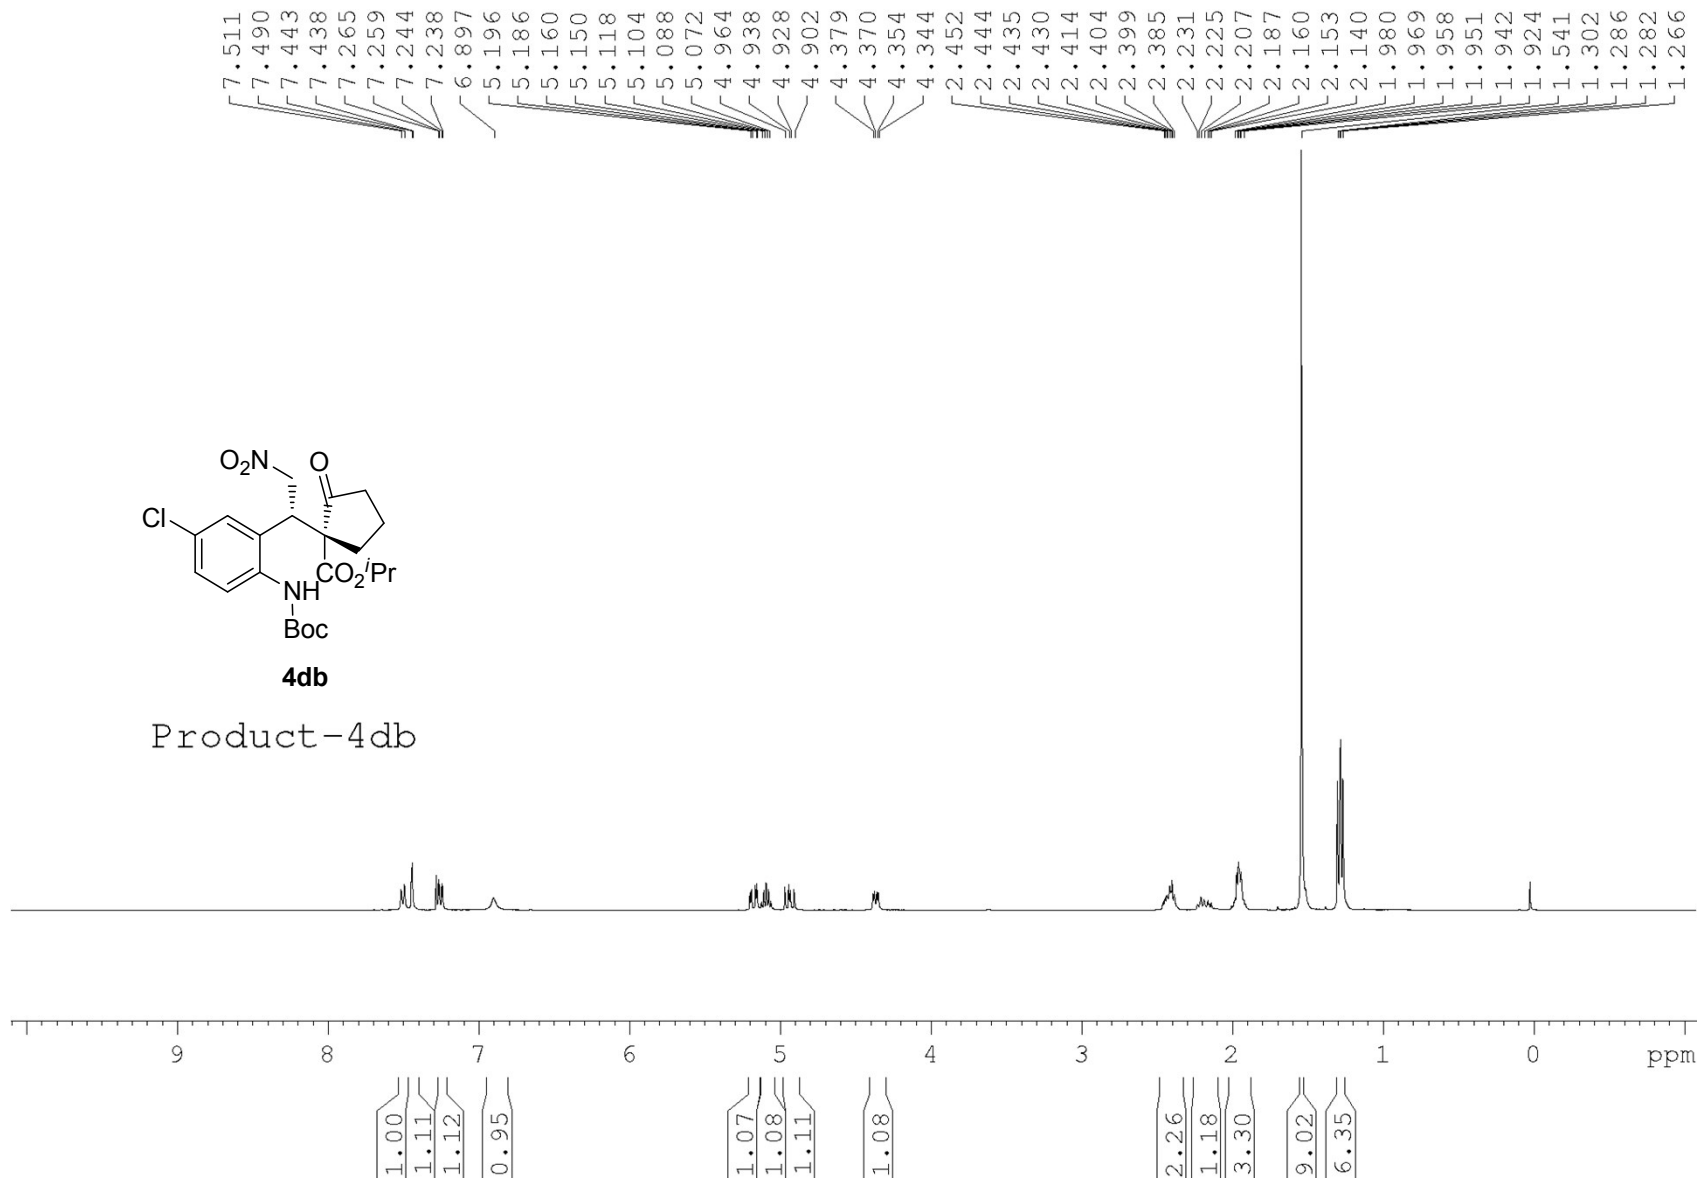

— 212.82

— 168.74

— 153.75

135.79  
132.22  
131.22  
128.77  
128.34  
127.68

80.71  
77.26  
76.94  
76.76  
76.63  
70.61  
62.92

38.49  
37.58  
31.72  
28.27  
21.50  
21.32  
19.34

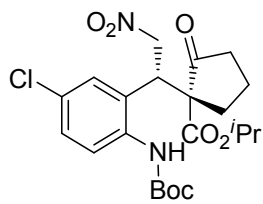

**4db**

Product-4db

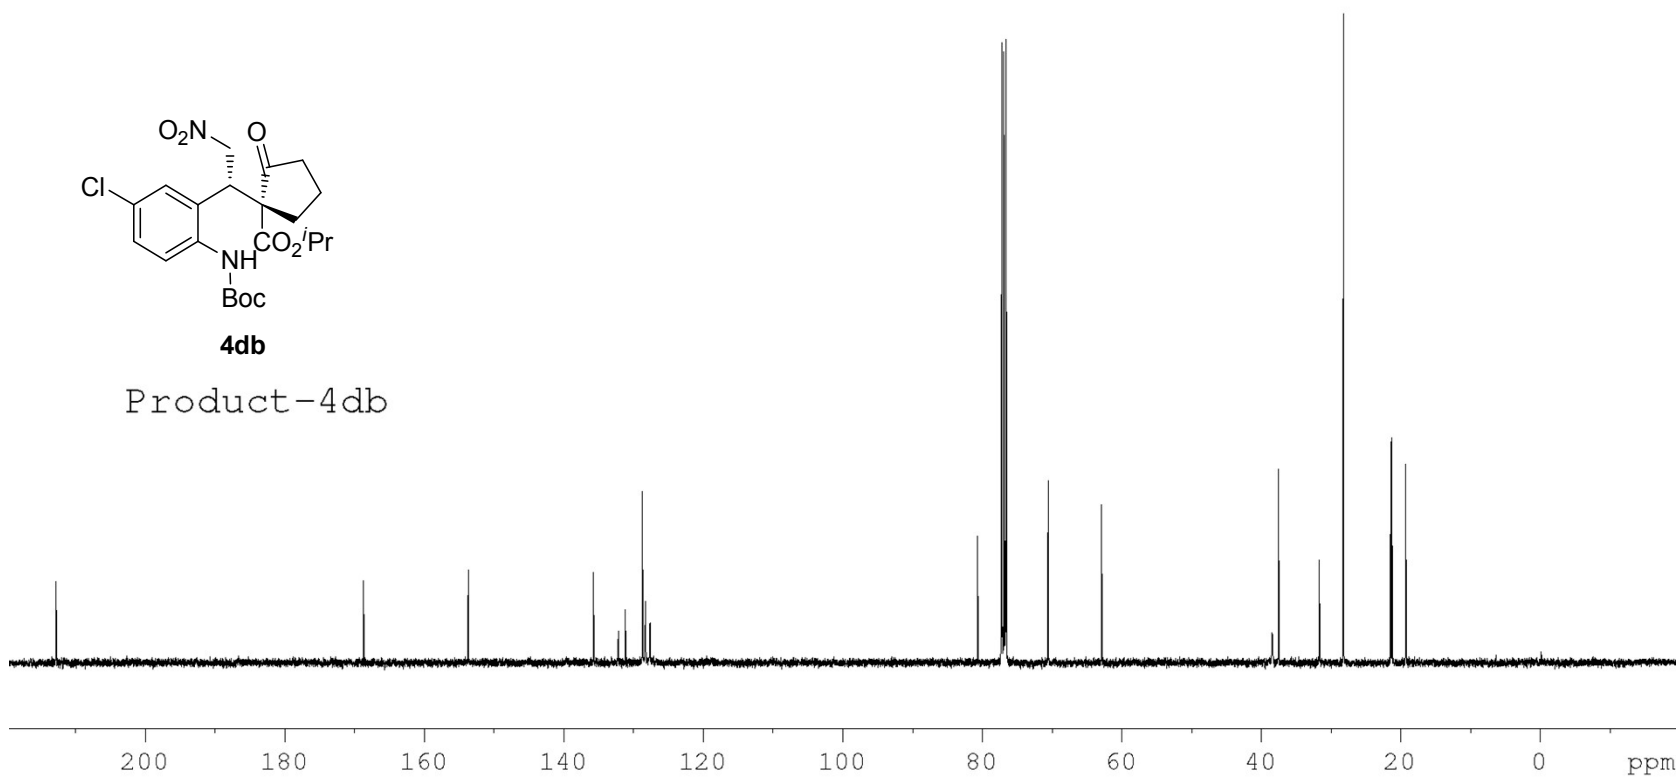

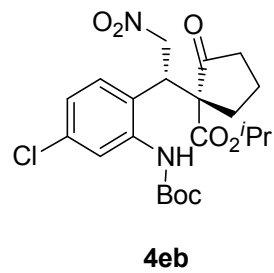

Product-4eb

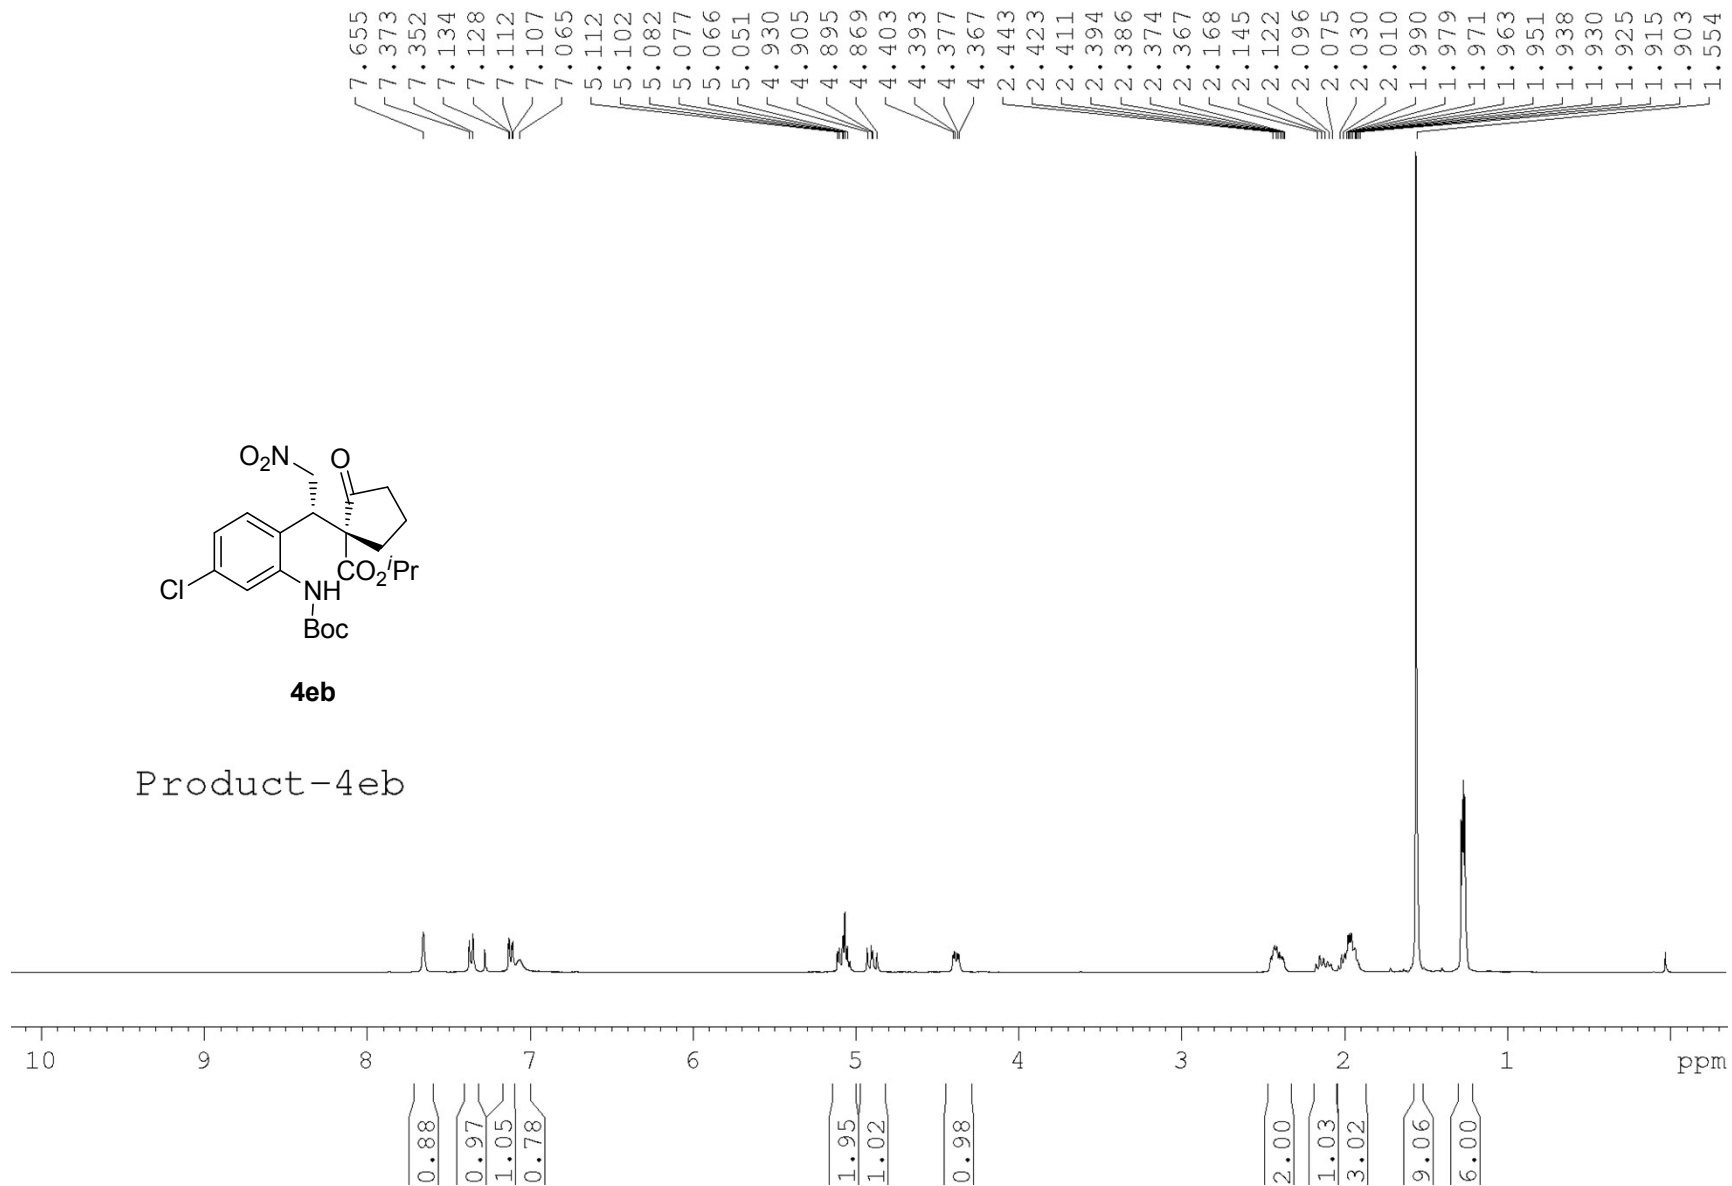

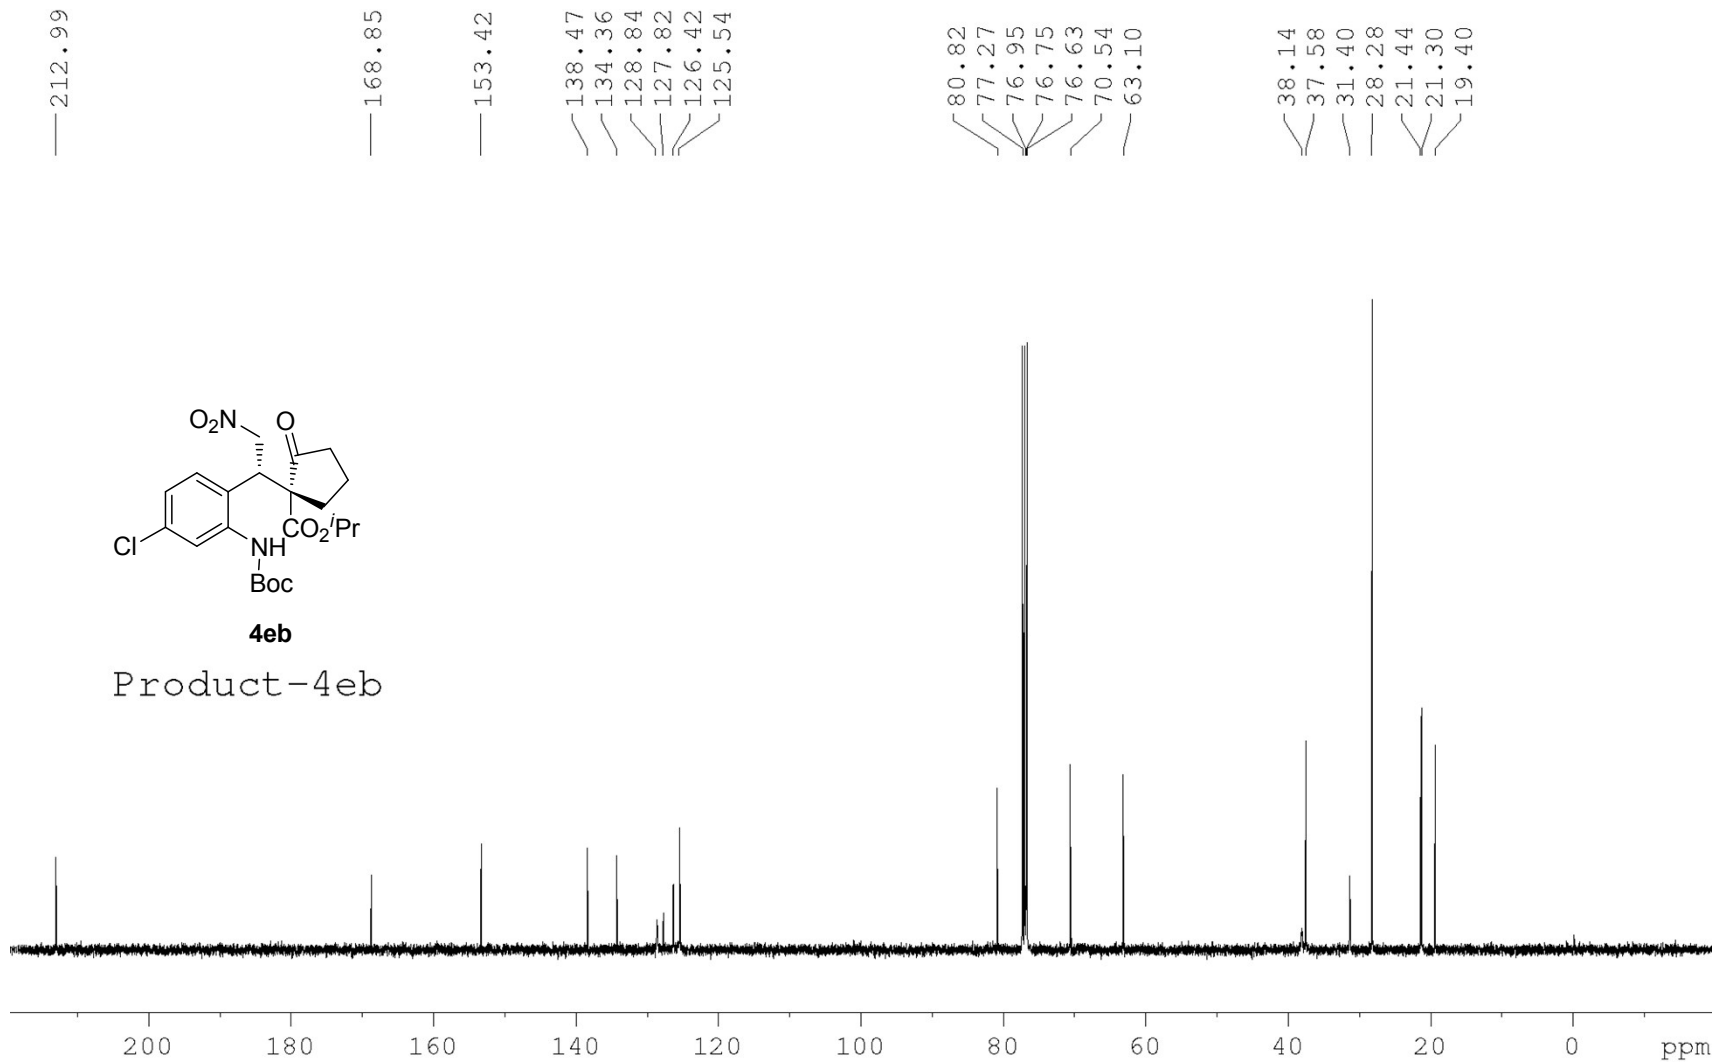

8.348  
7.554  
7.534  
7.534  
7.172  
7.152  
7.141  
7.133  
7.123  
6.937  
6.918  
5.005  
4.992  
4.985  
4.977  
4.831  
4.815  
4.810  
4.799  
4.791  
4.781  
4.563  
4.558  
4.544  
4.535  
4.528  
2.631  
2.624  
2.617  
2.509  
2.503  
2.492  
2.487  
2.482  
2.393  
2.380  
2.364  
2.360  
2.237  
1.998  
1.879  
1.848  
1.833  
1.817  
1.813  
1.805  
1.799  
1.795  
1.789  
1.571  
1.533  
1.150  
1.134  
1.117  
1.101  
1.072  
1.056  
1.045  
1.029

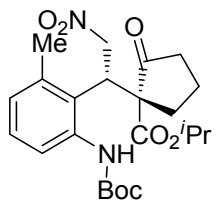

**4fb**

Product-4fb

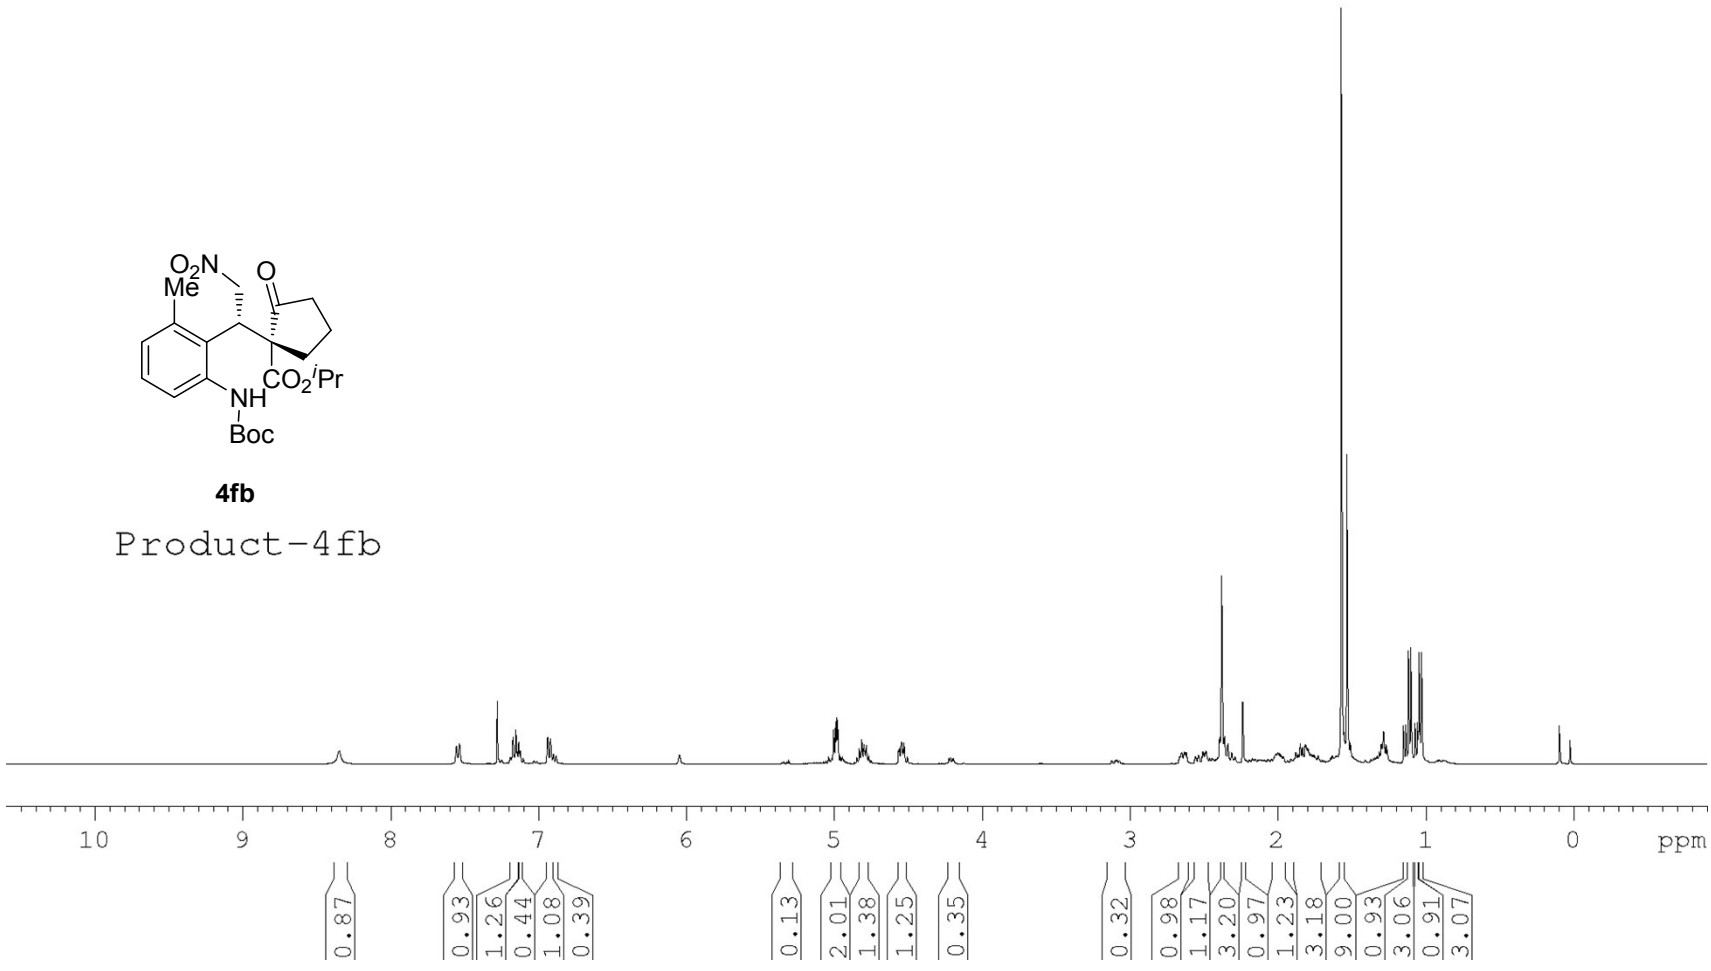

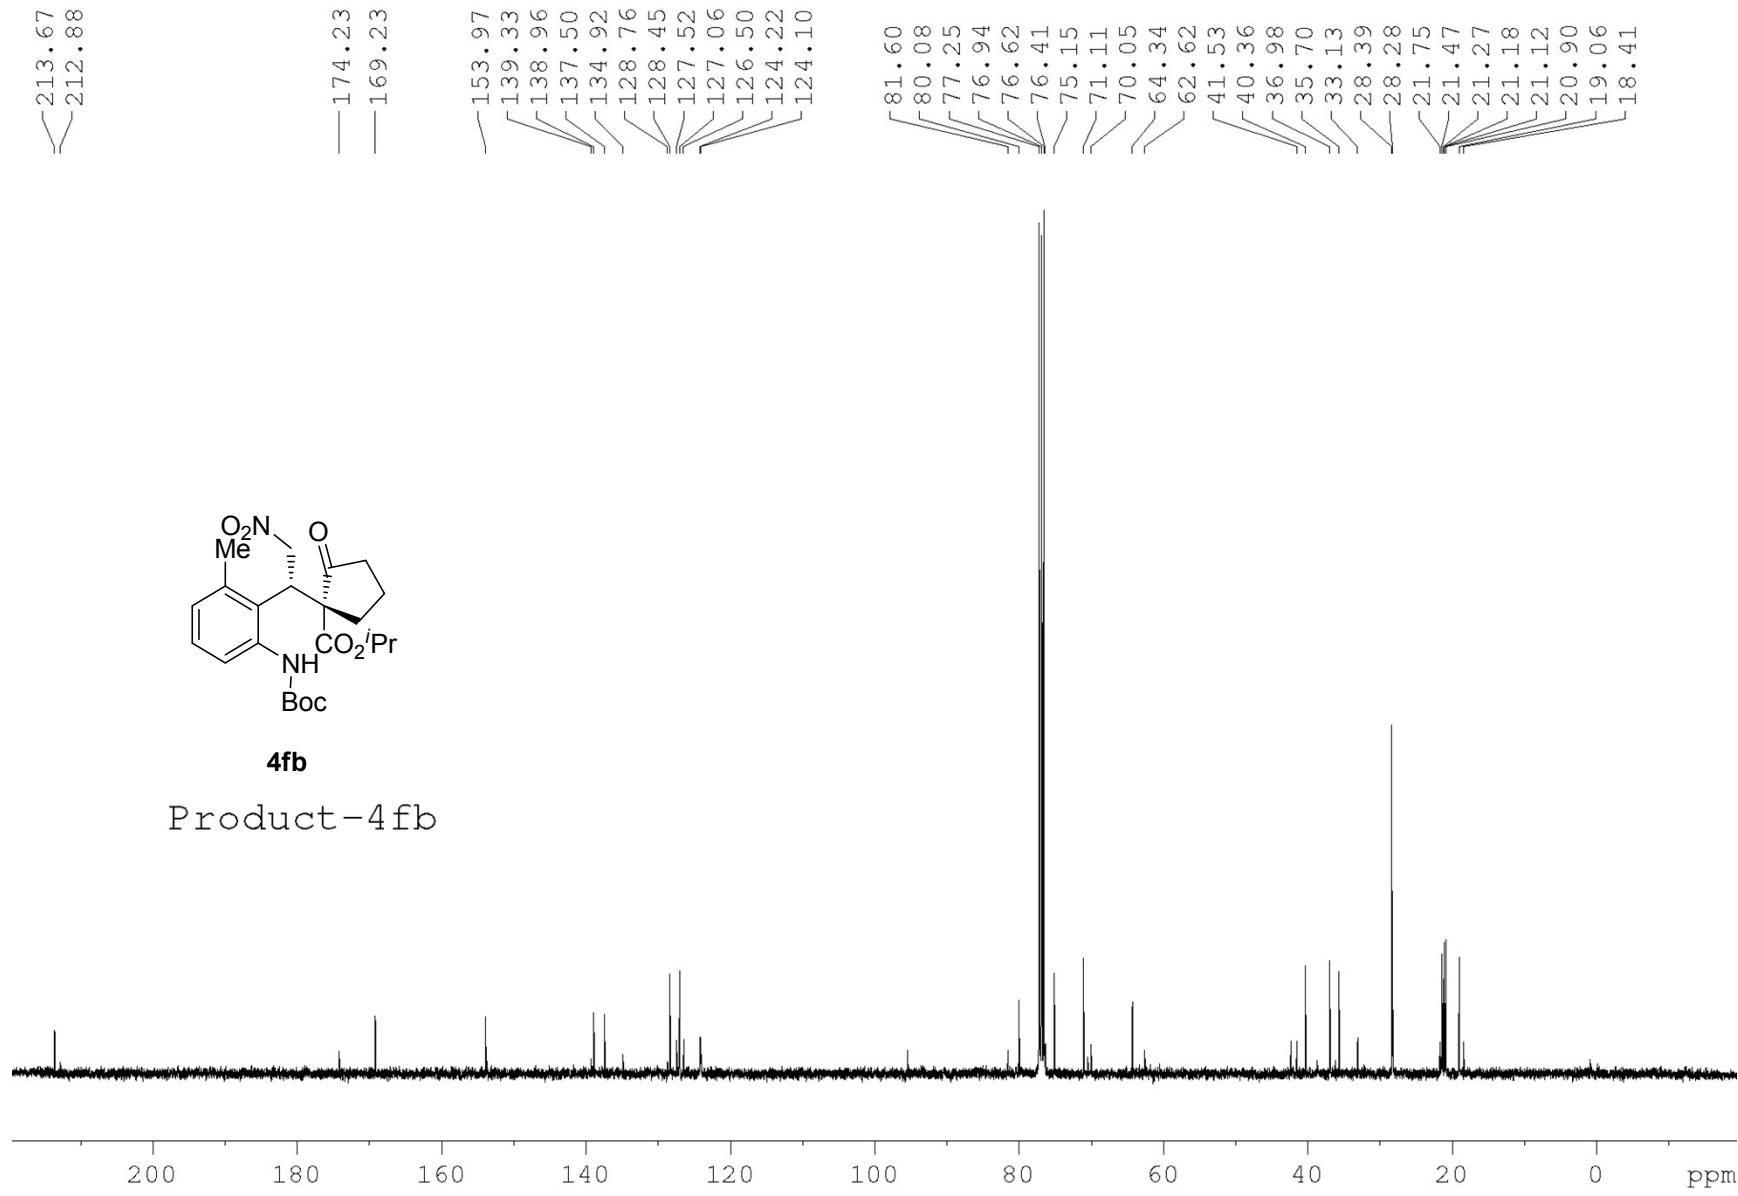

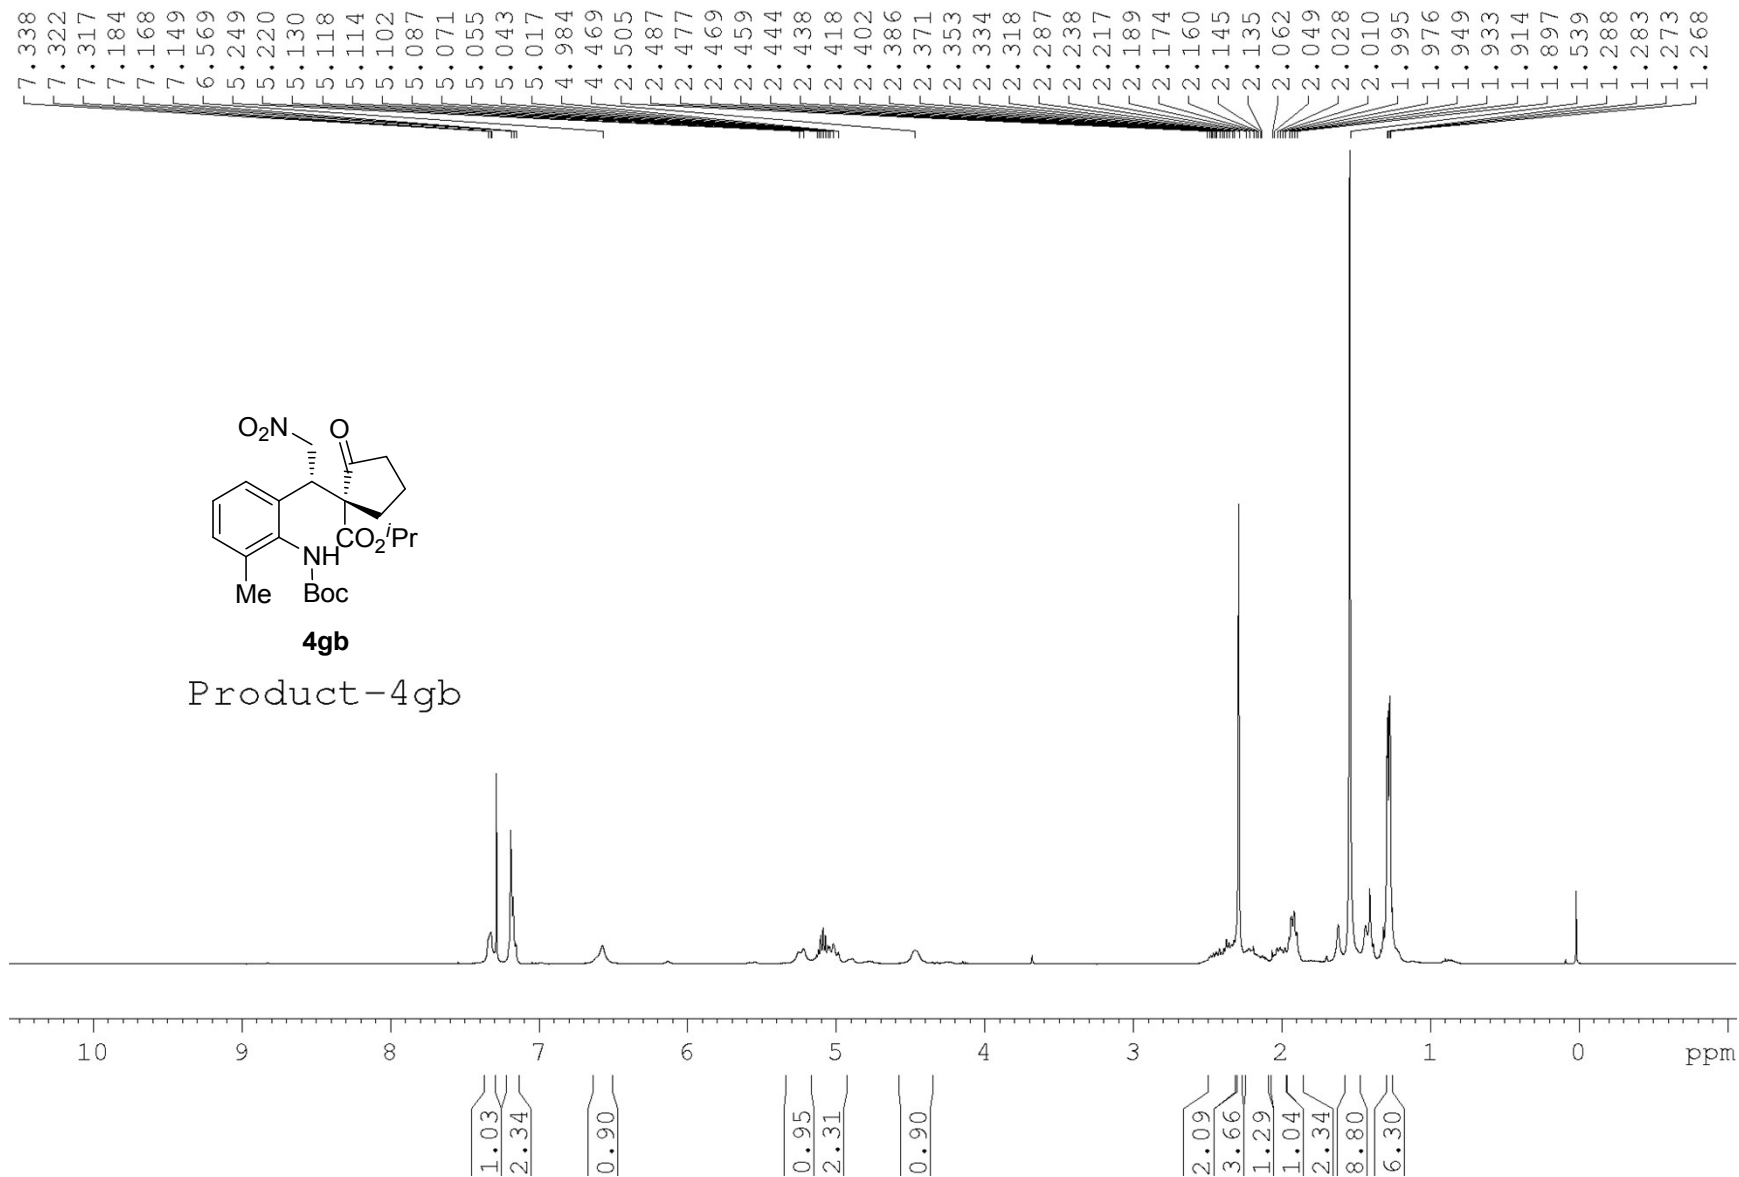



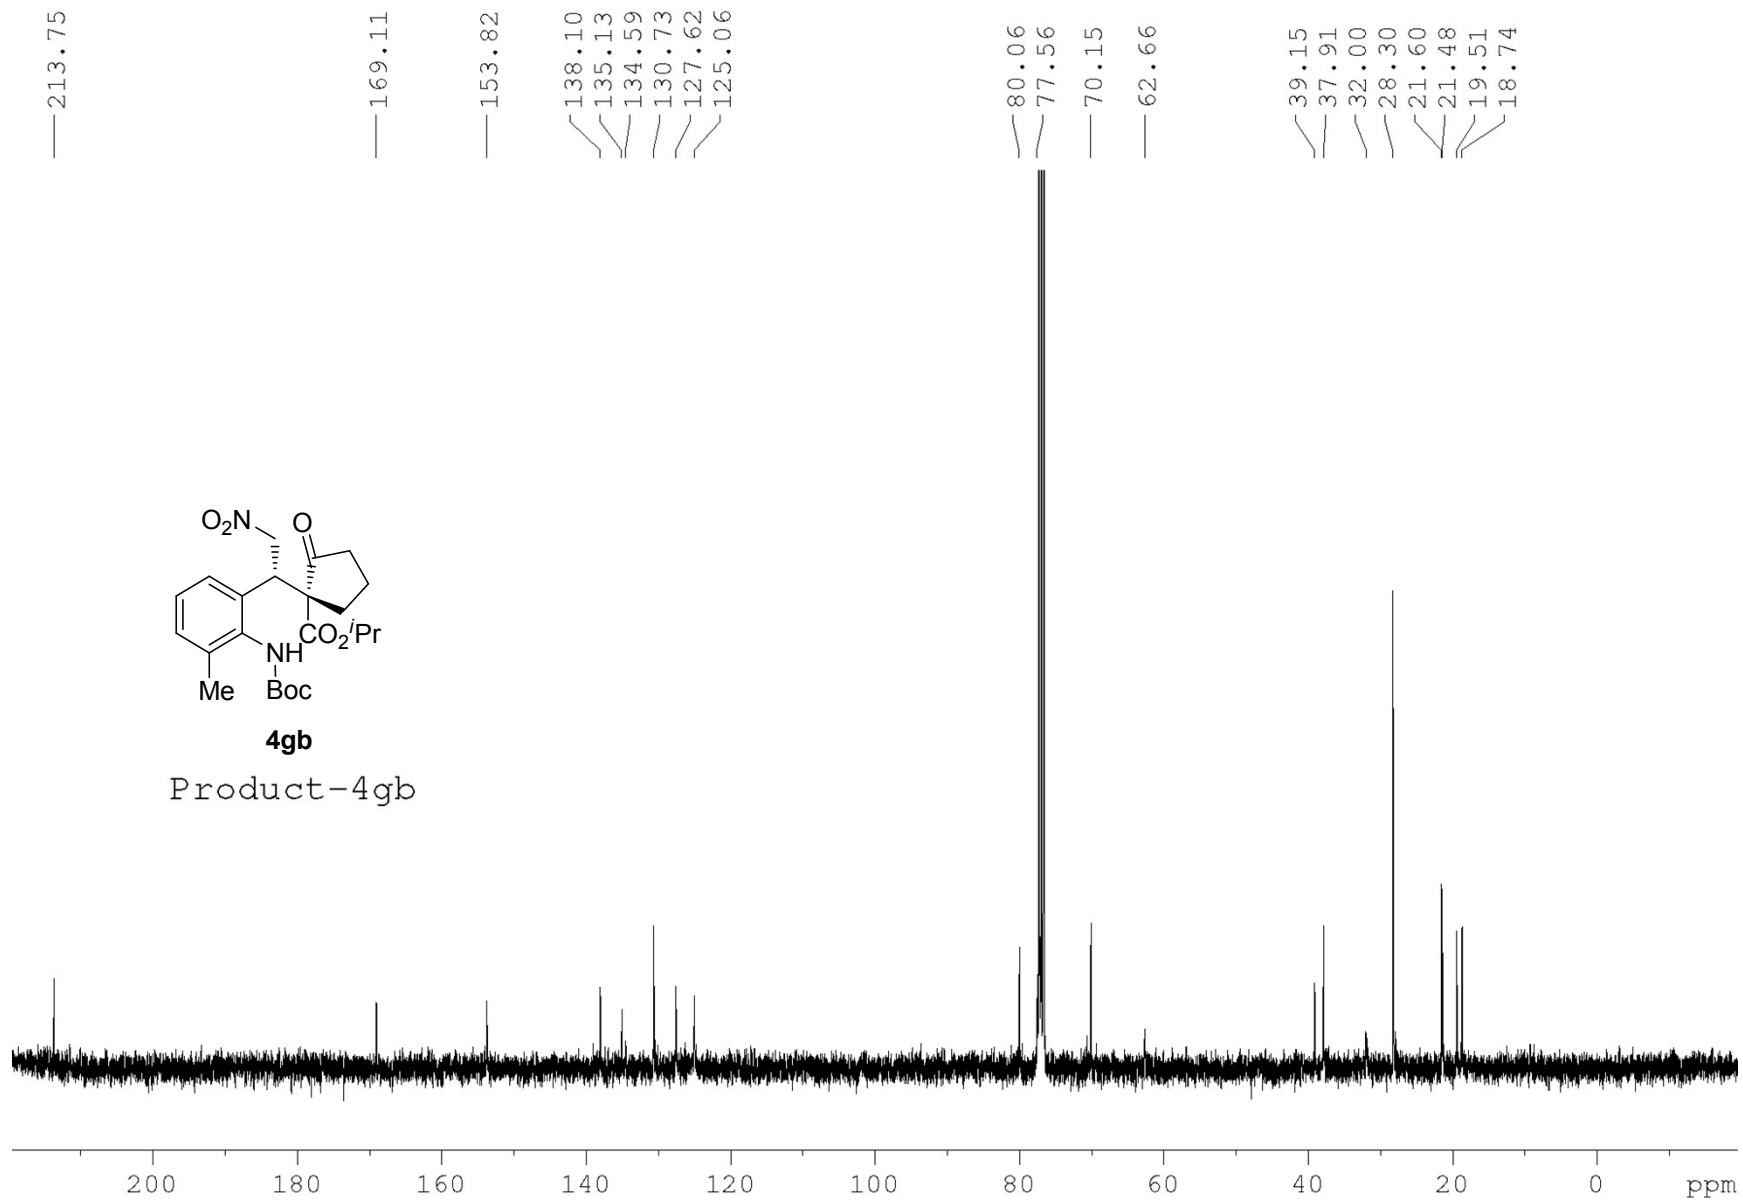

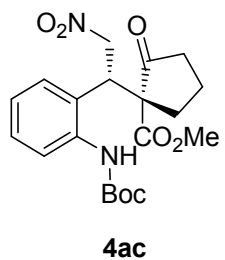

Product-4ac

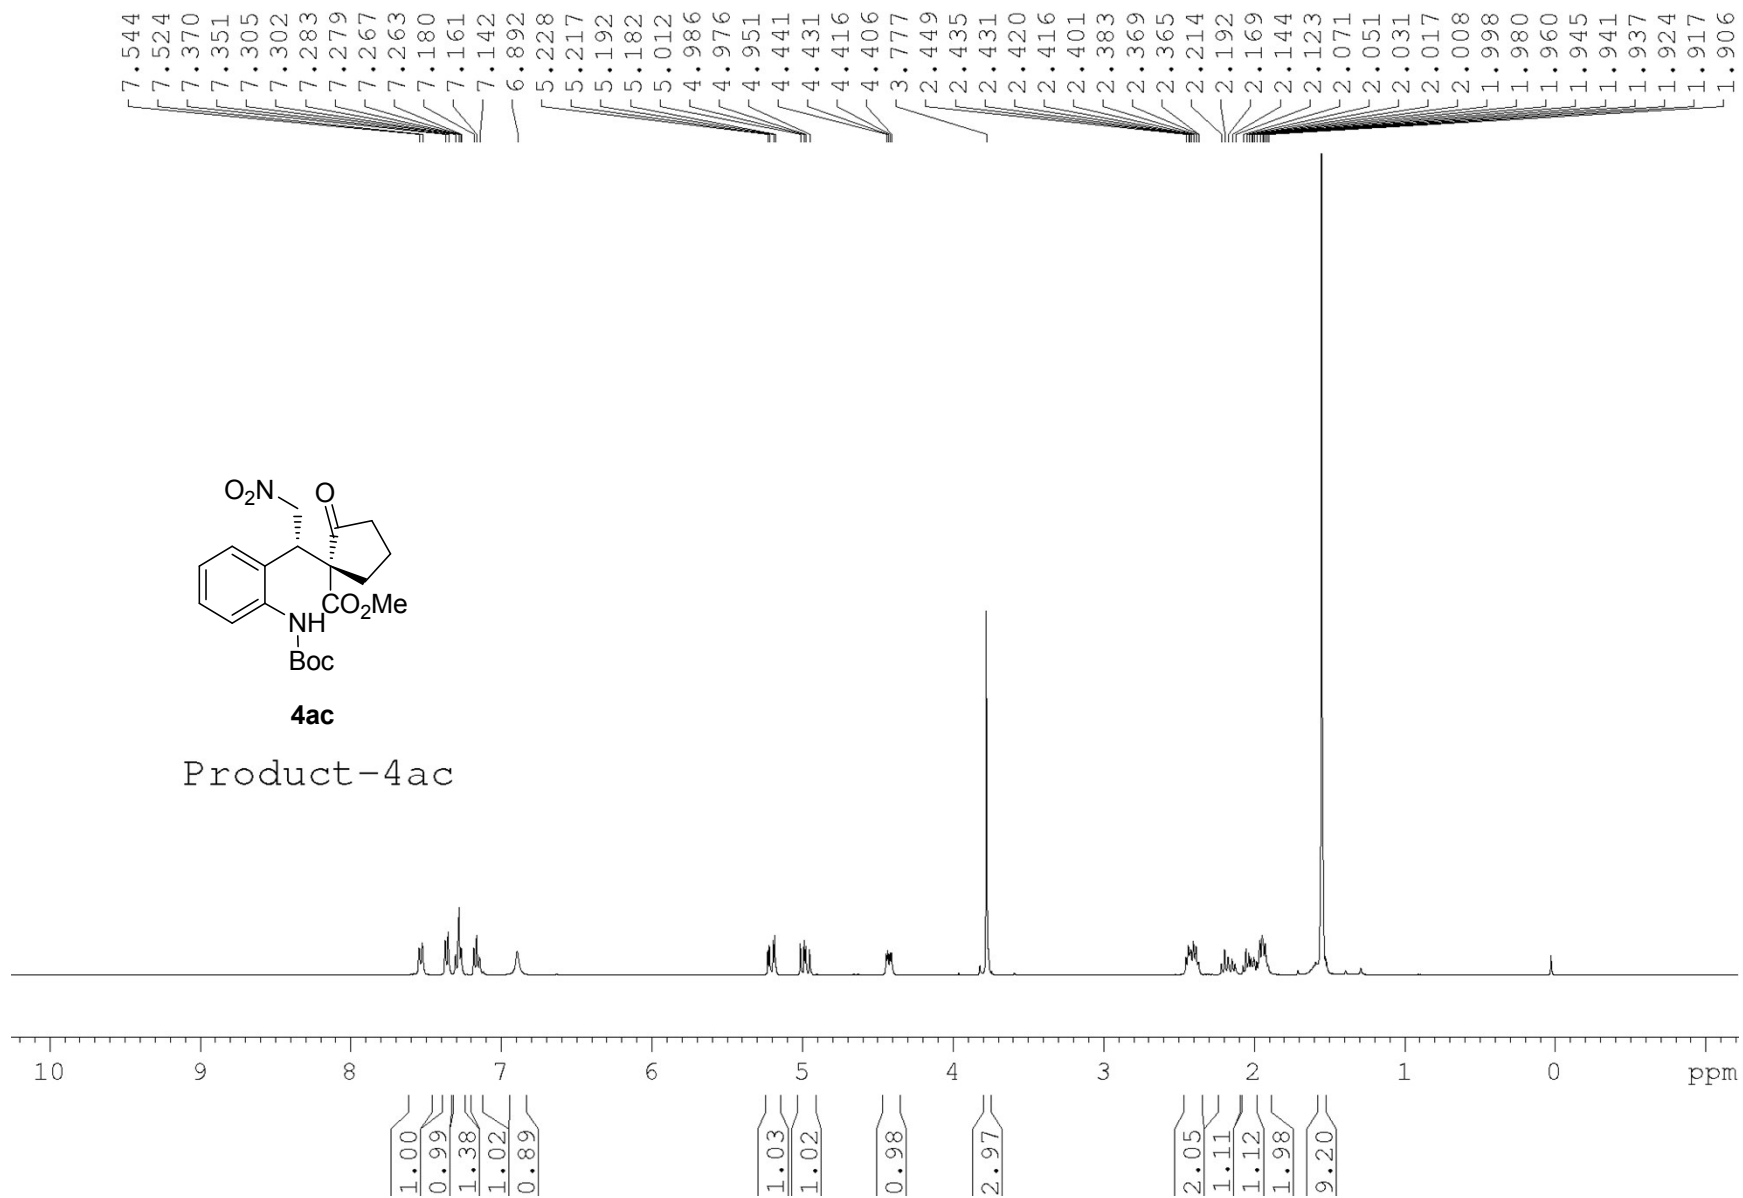

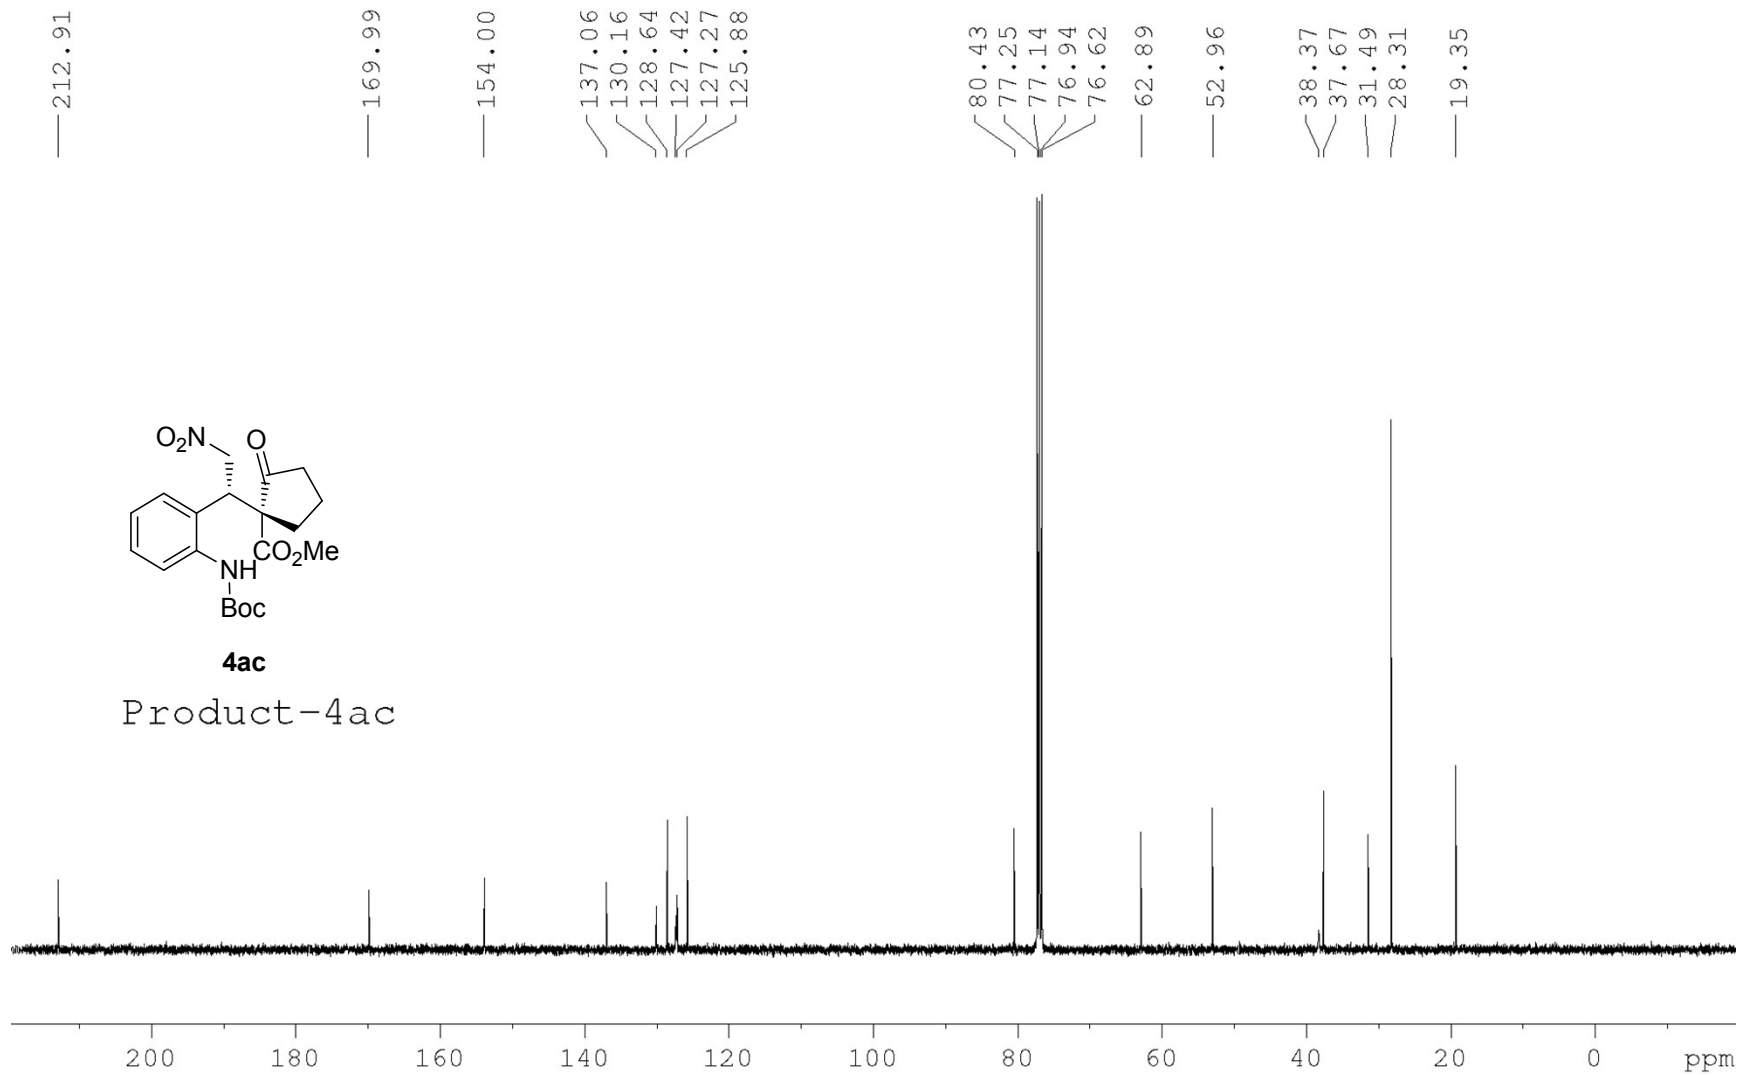

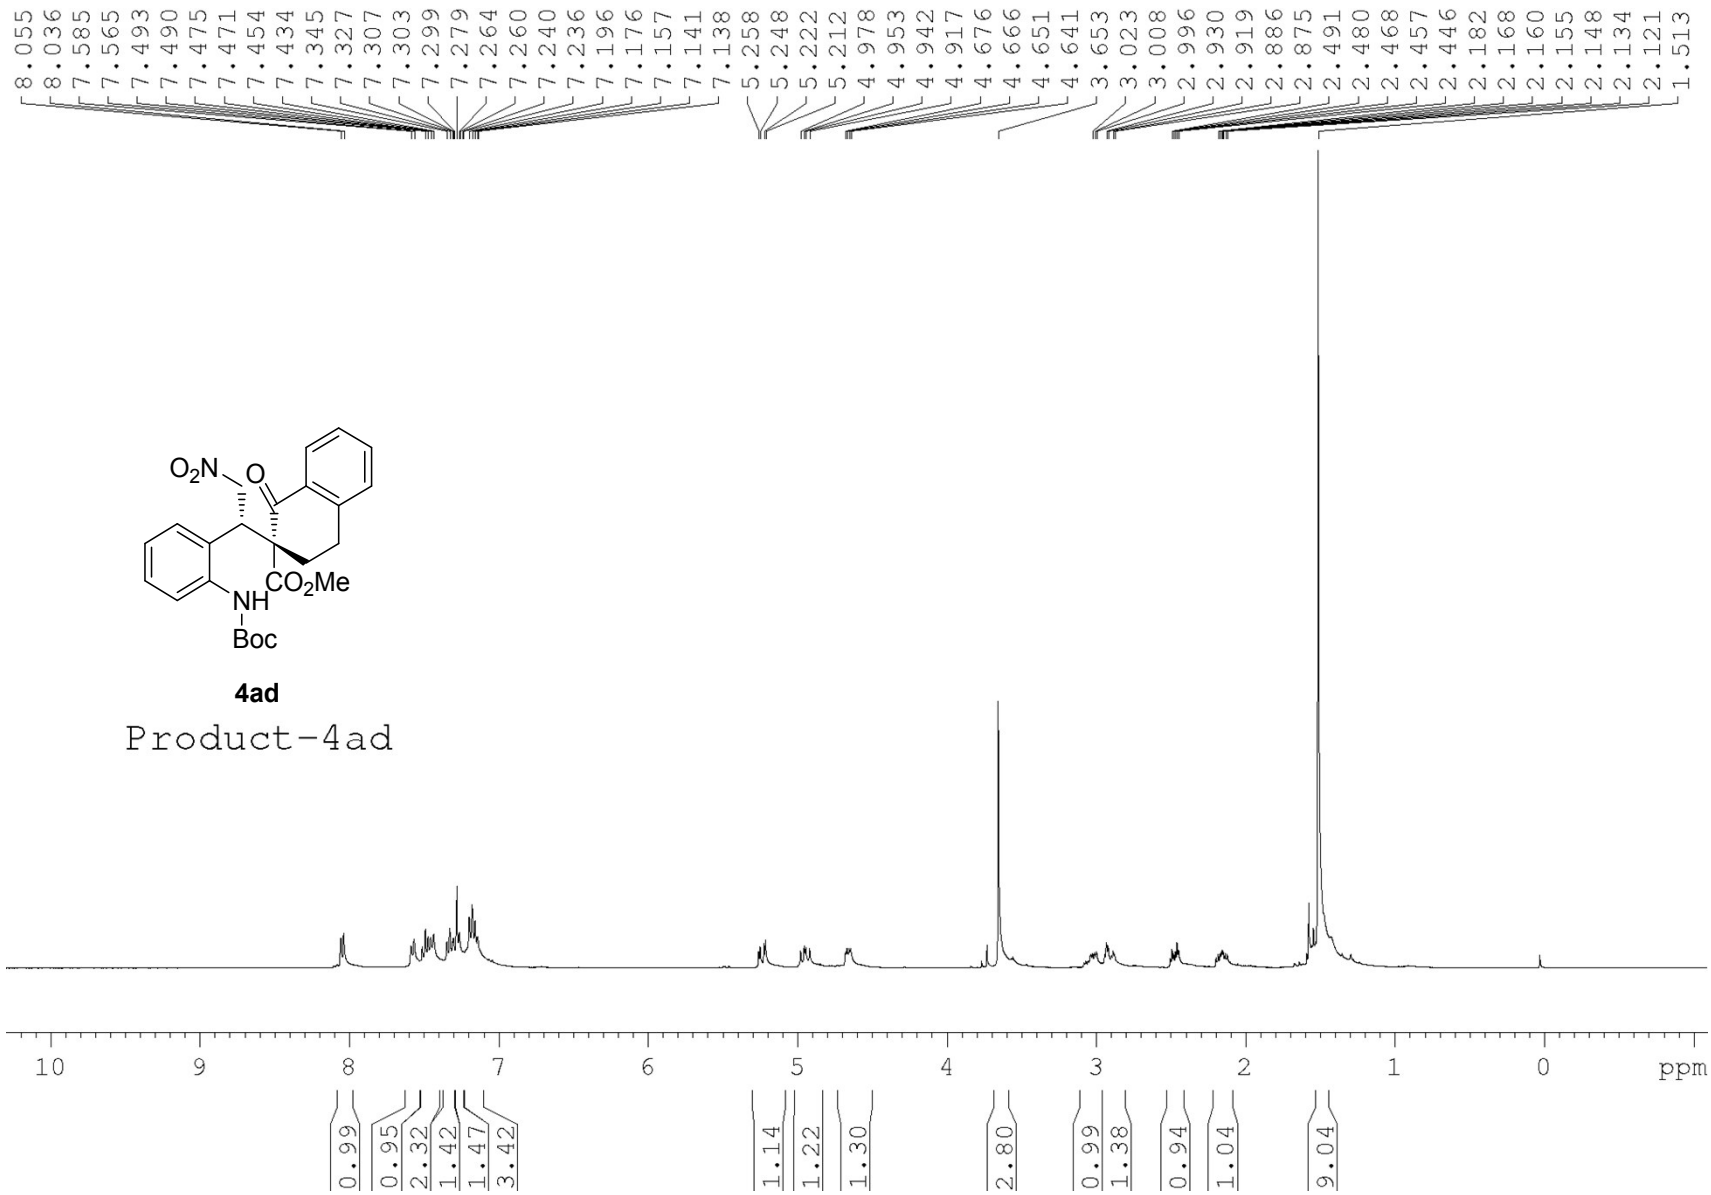

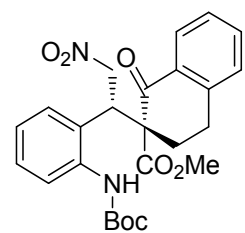

**4ad**

Product-4ad

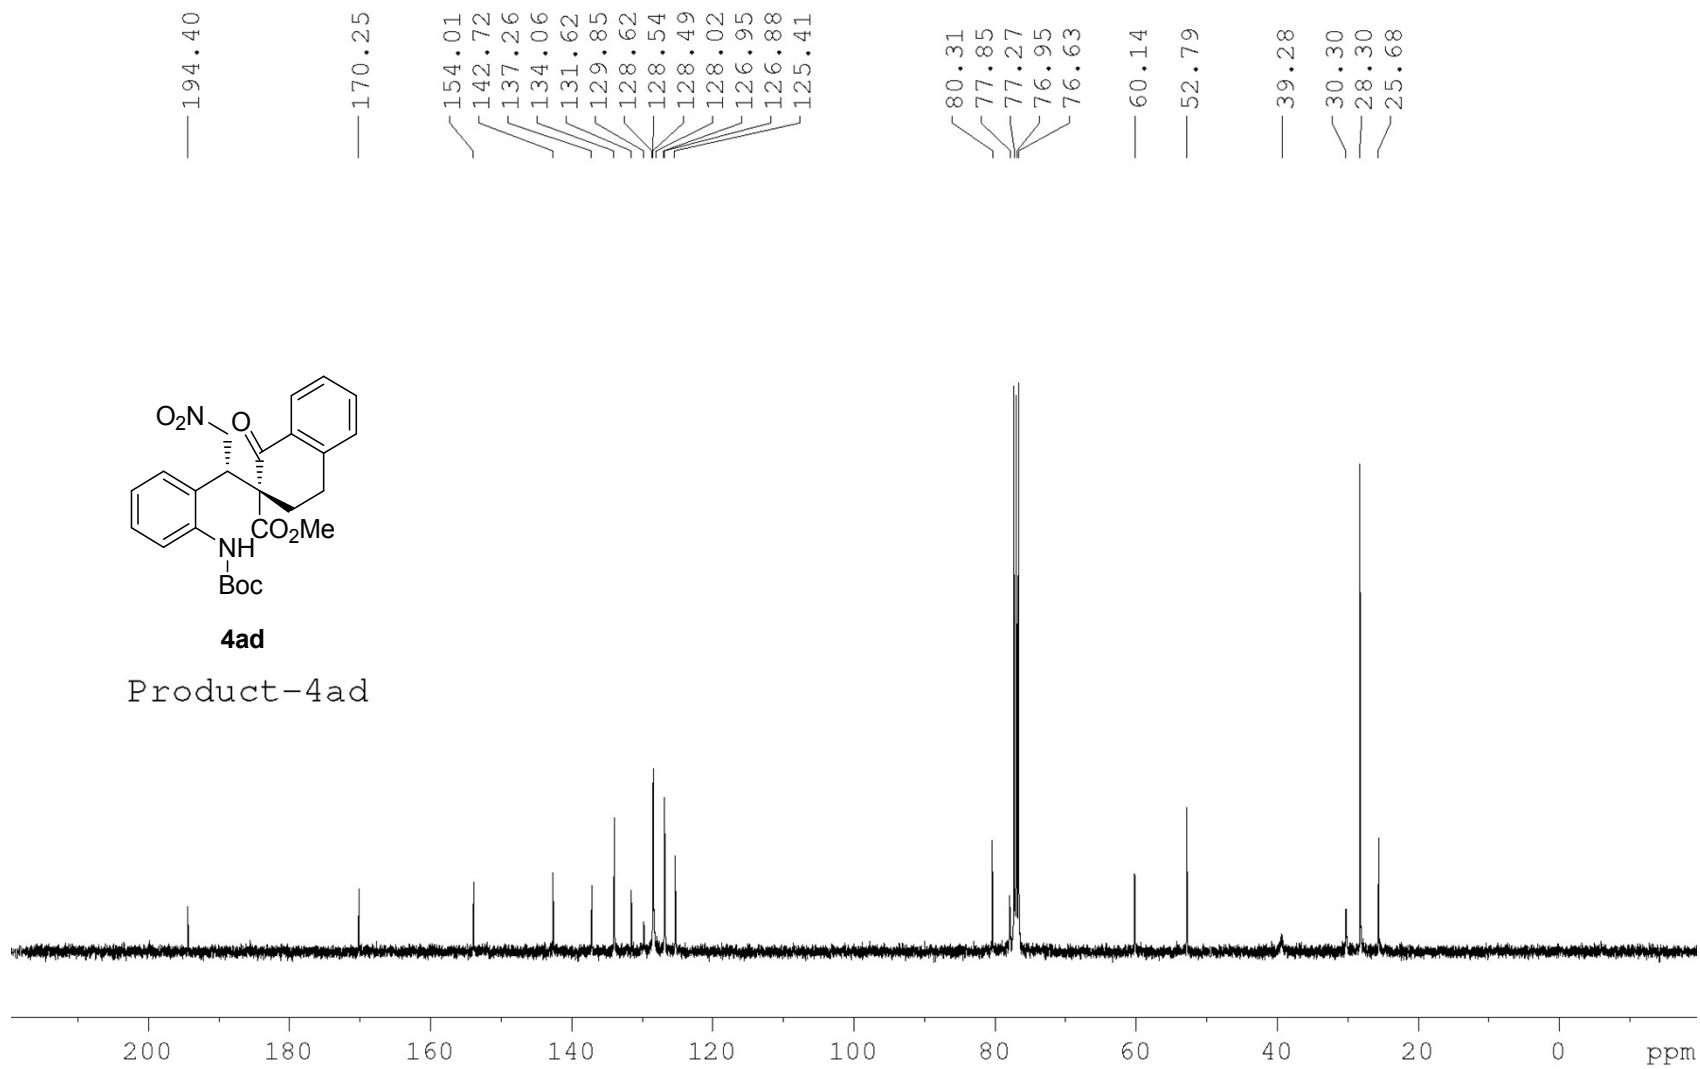

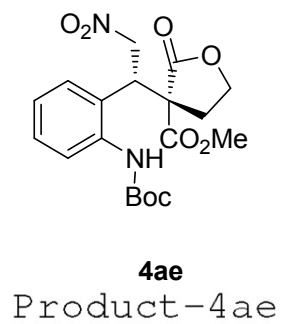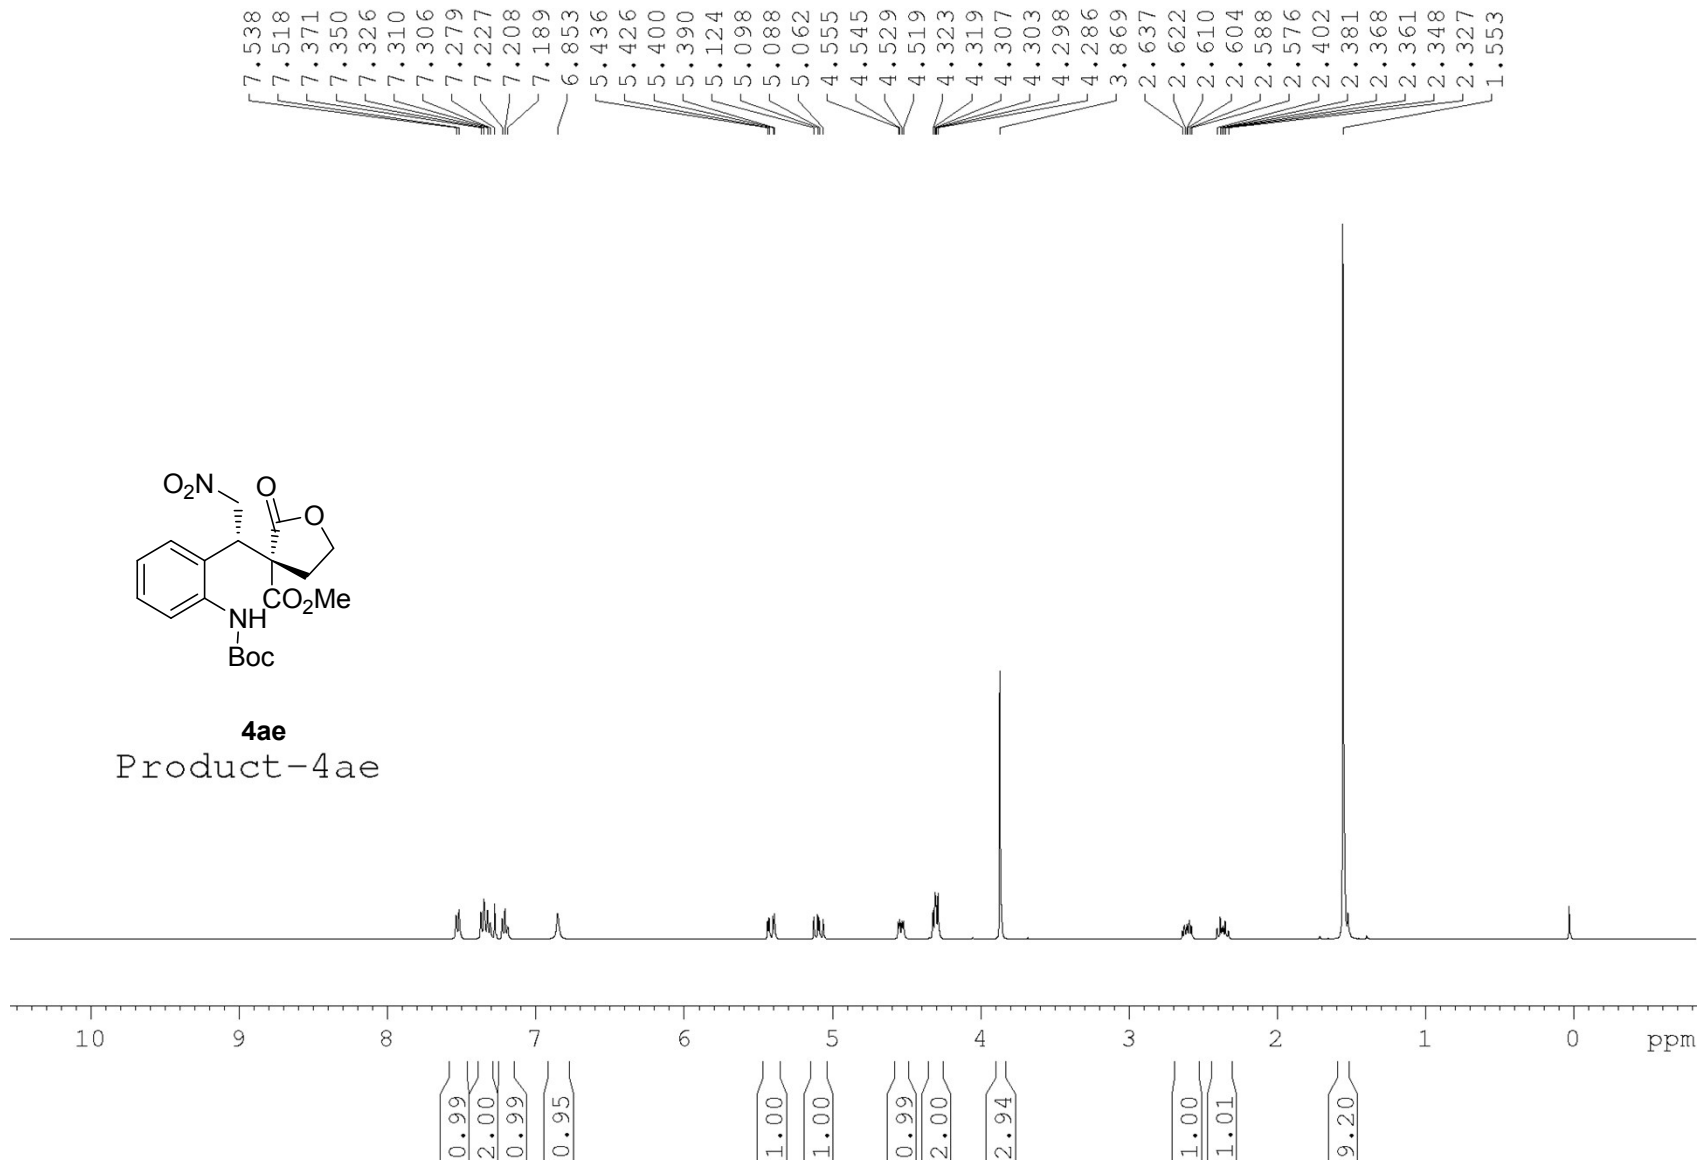

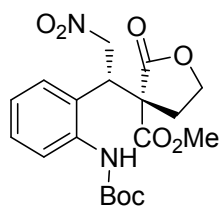

**4ae**

Product-4ae

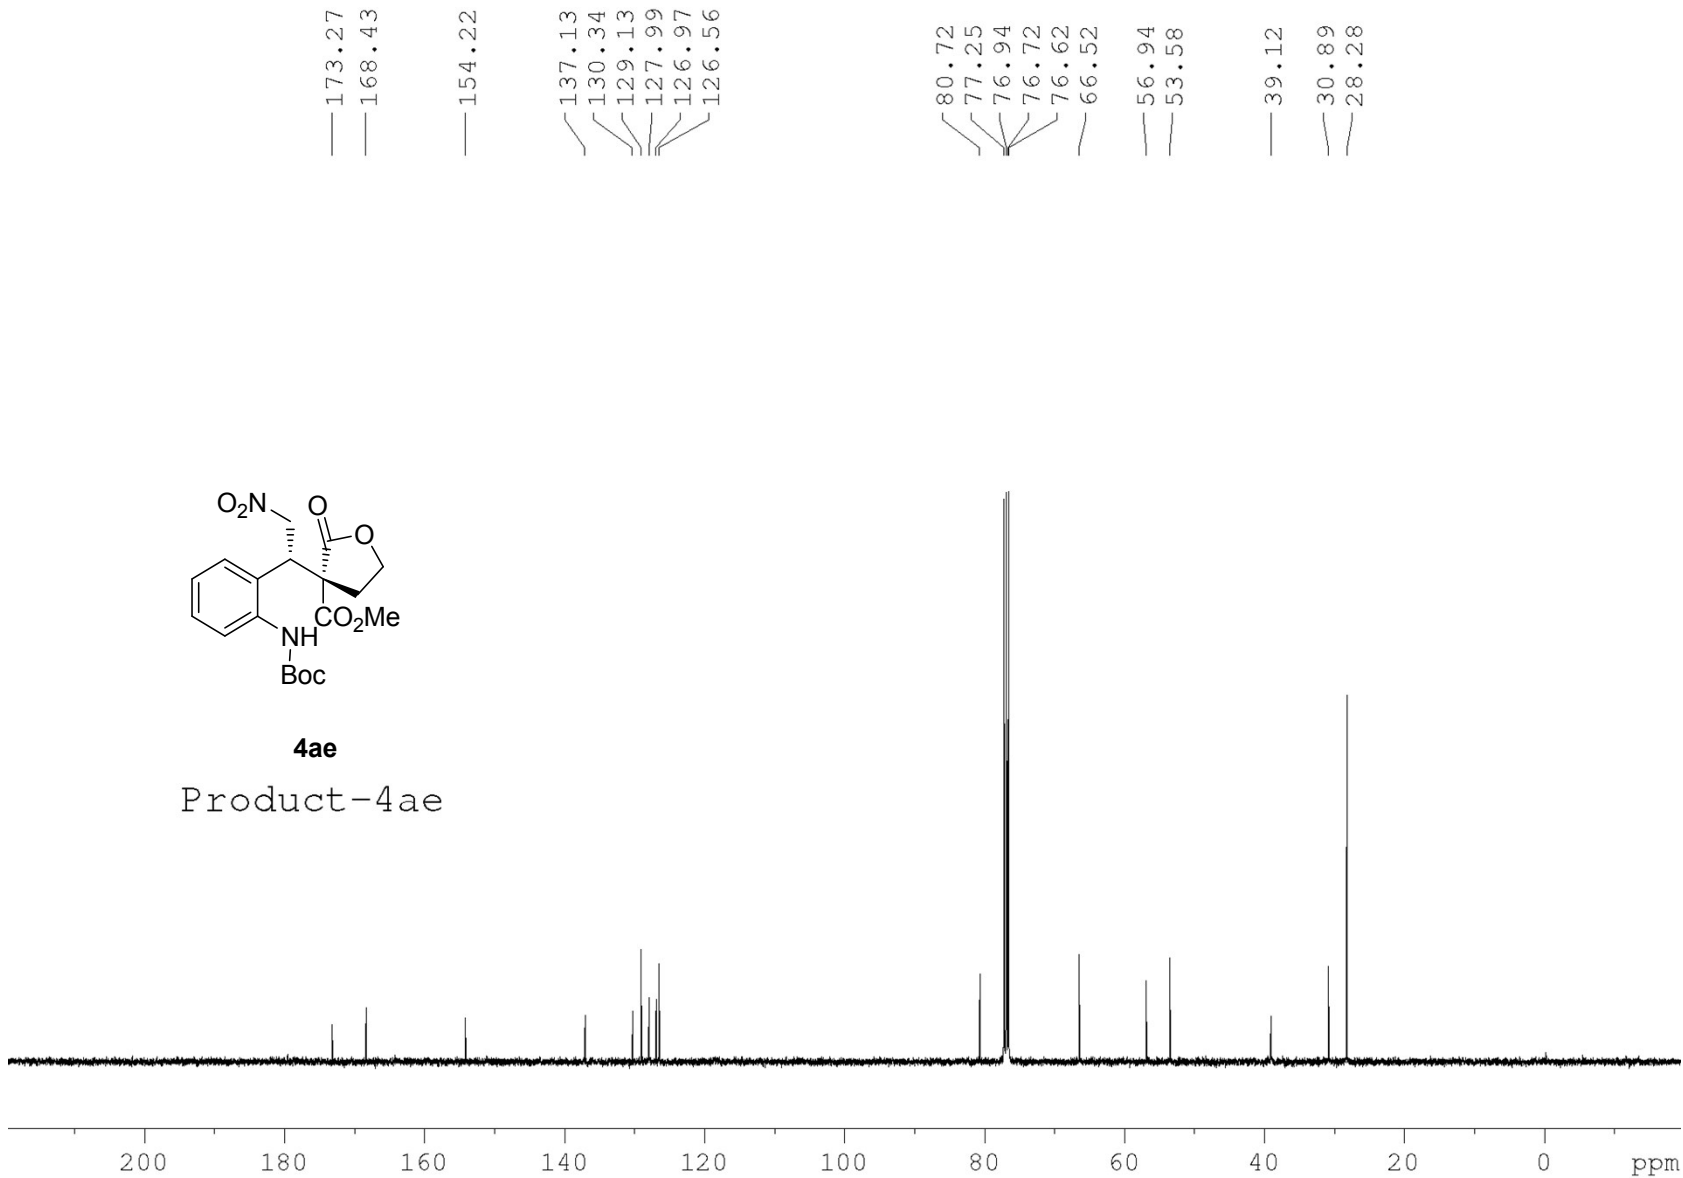

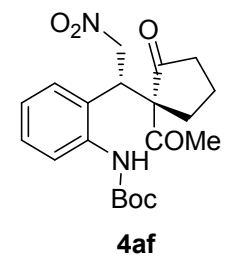

Product-4af

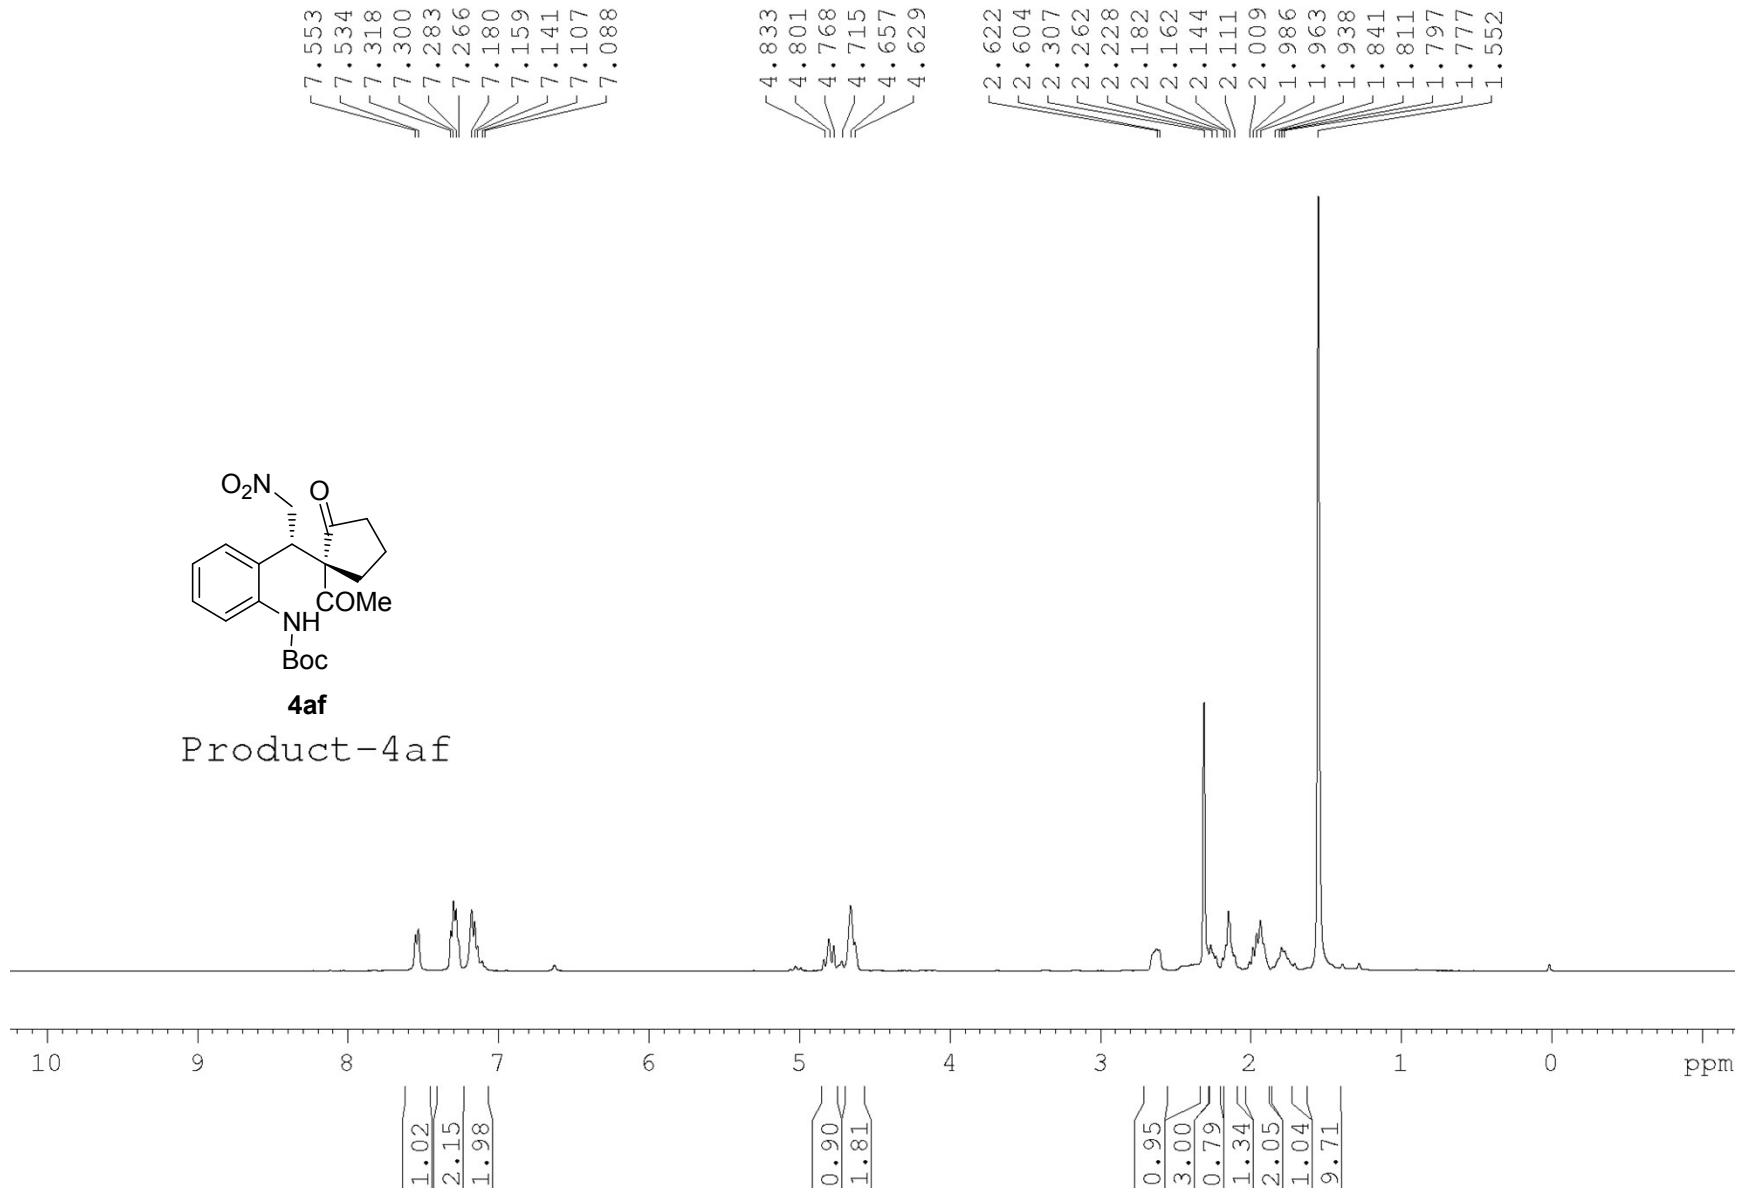



217.57  
215.02

203.20  
202.40

154.05  
153.96  
137.22  
137.04  
129.99  
129.35  
128.87  
128.76  
127.65  
127.58  
126.76  
126.24  
125.70

80.80  
80.43  
77.28  
76.96  
76.79  
76.64  
76.48  
71.71  
69.85

39.46  
39.19  
38.47  
38.36  
31.20  
28.41  
28.32  
26.65  
26.55  
19.48

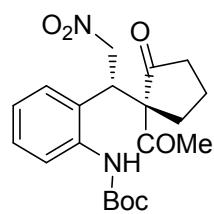

**4af**

Product-4af

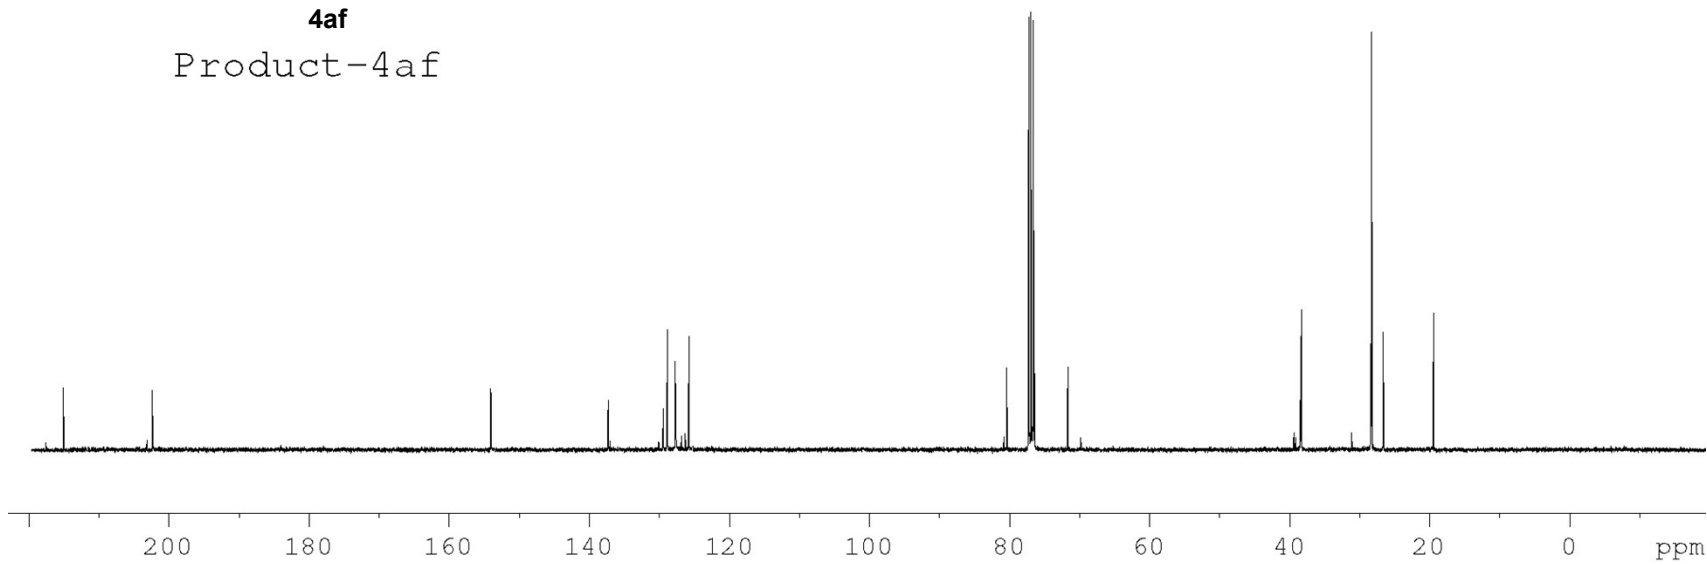

7.709  
7.689  
7.342  
7.337  
7.324  
7.320  
7.317  
7.304  
7.299  
7.280  
7.236  
7.231  
7.217  
7.212  
7.203  
7.201  
7.186  
7.183  
7.167  
7.164  
4.735  
4.720  
4.712  
4.697  
4.486  
4.470  
4.456  
4.441  
4.353  
4.334  
4.325  
4.314  
4.307  
4.296  
4.289  
4.279  
4.271  
4.261  
4.252  
4.235  
4.222  
4.199  
4.193  
4.170  
2.544  
1.564  
1.385  
1.368  
1.350

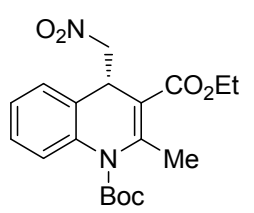

**5ag**

Product-5ag

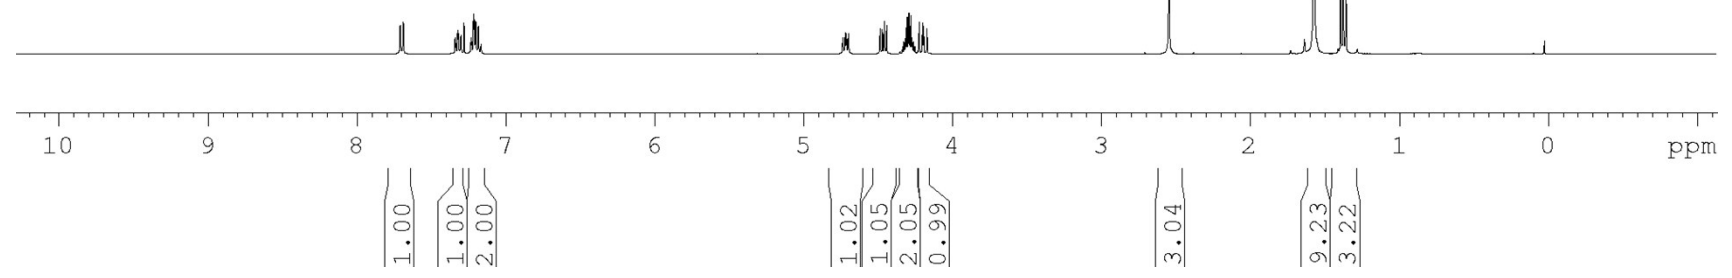

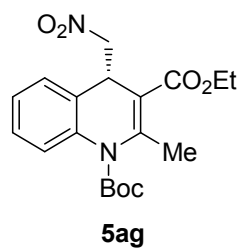

Product-5ag

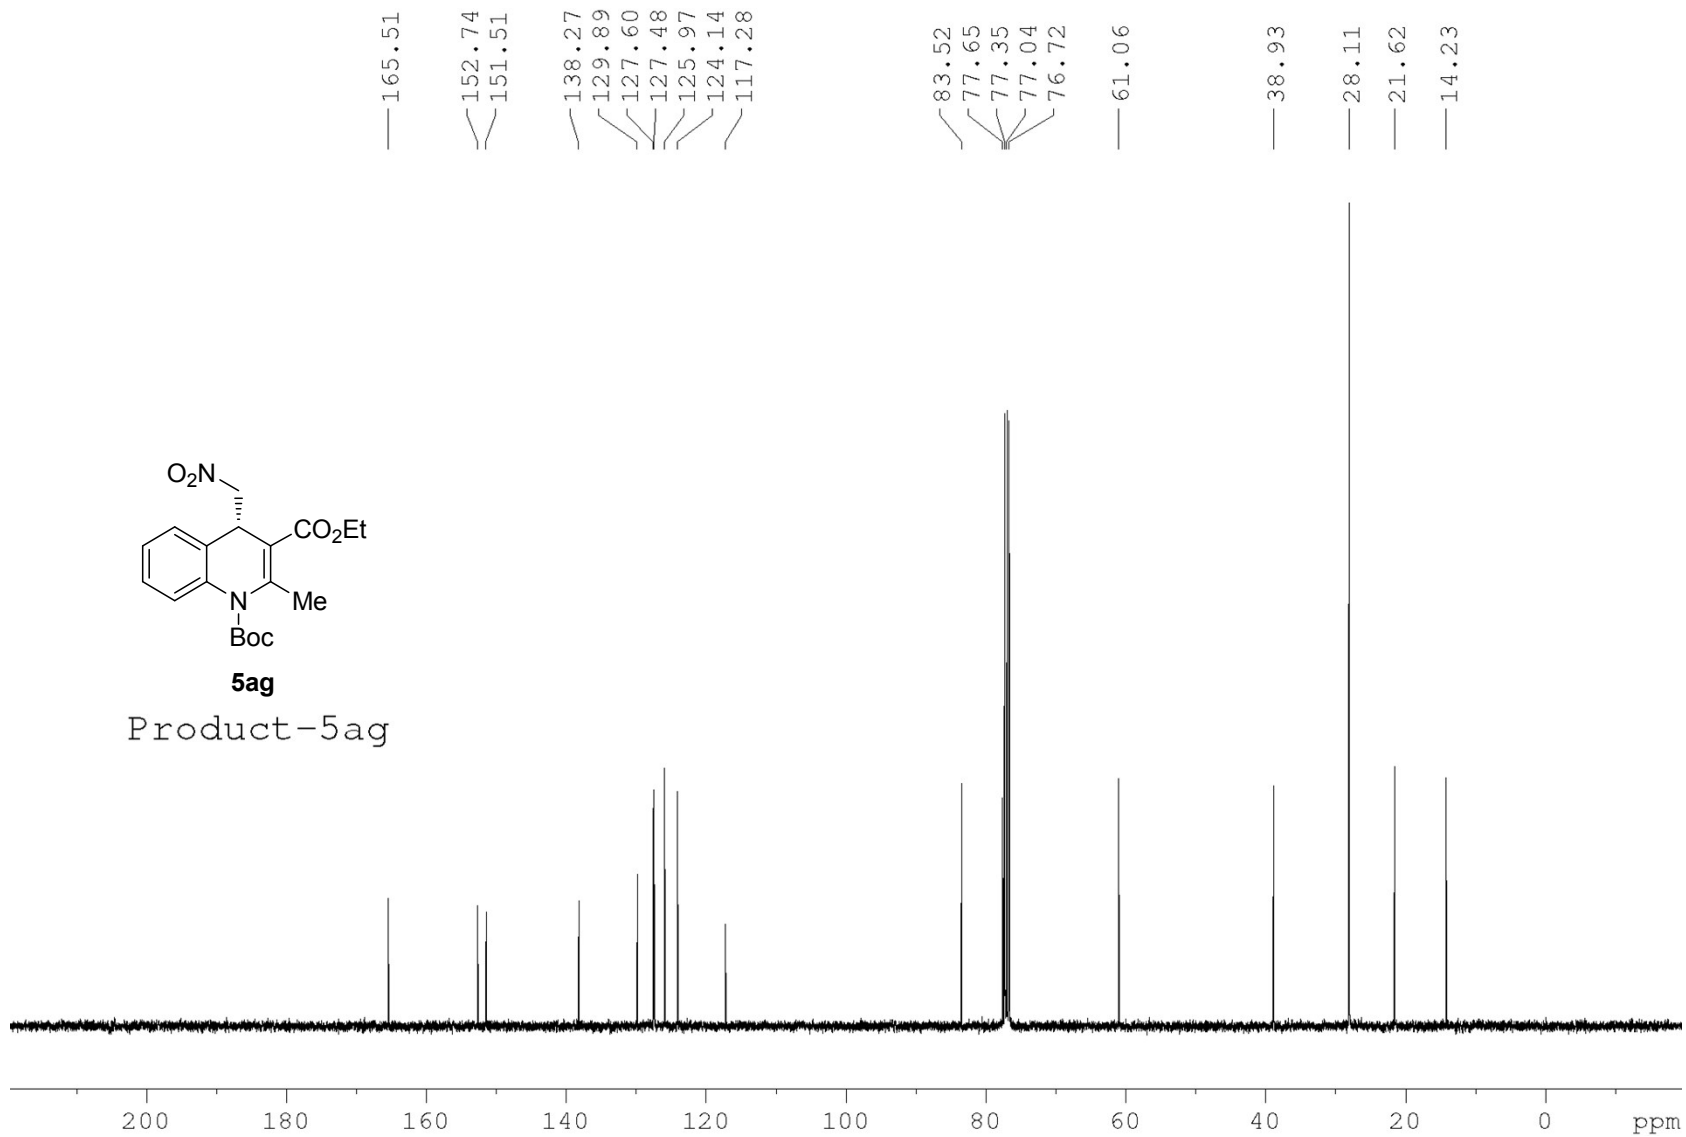

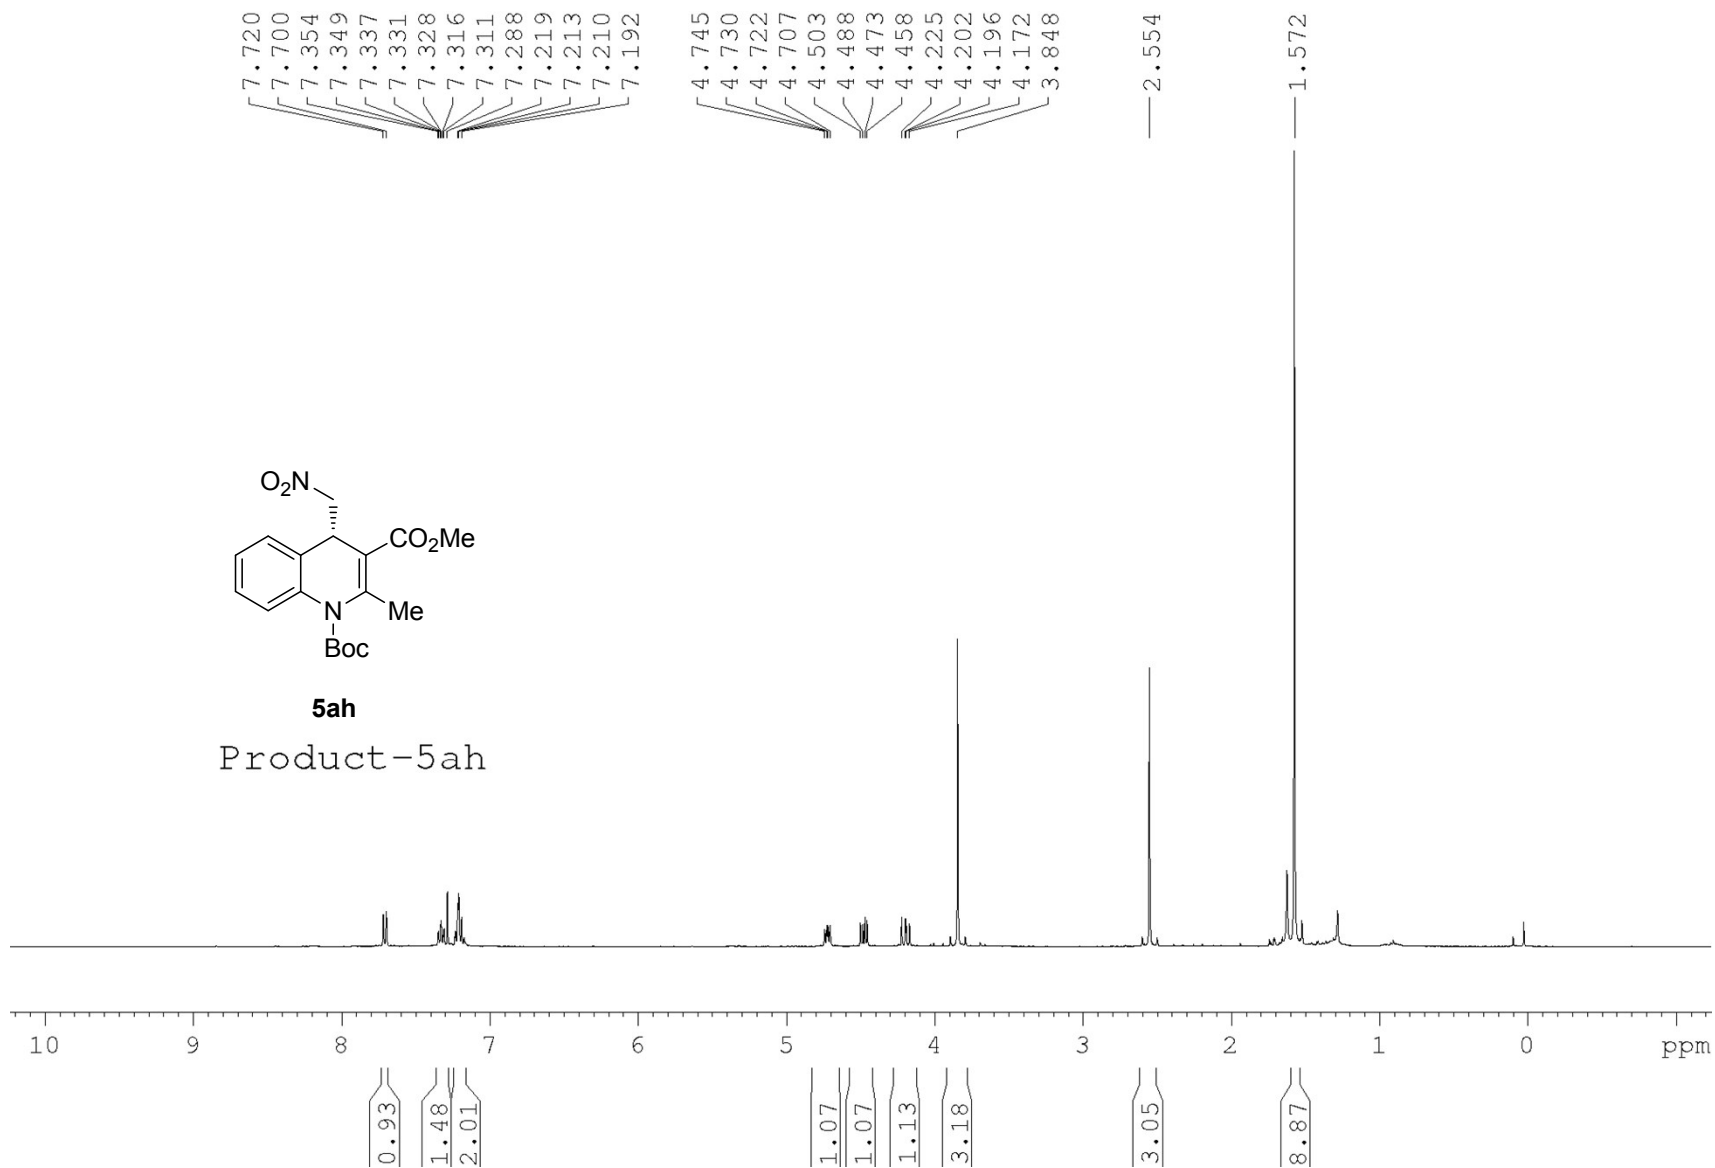

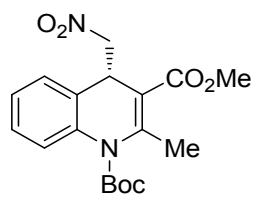

**5ah**  
Product-5ah

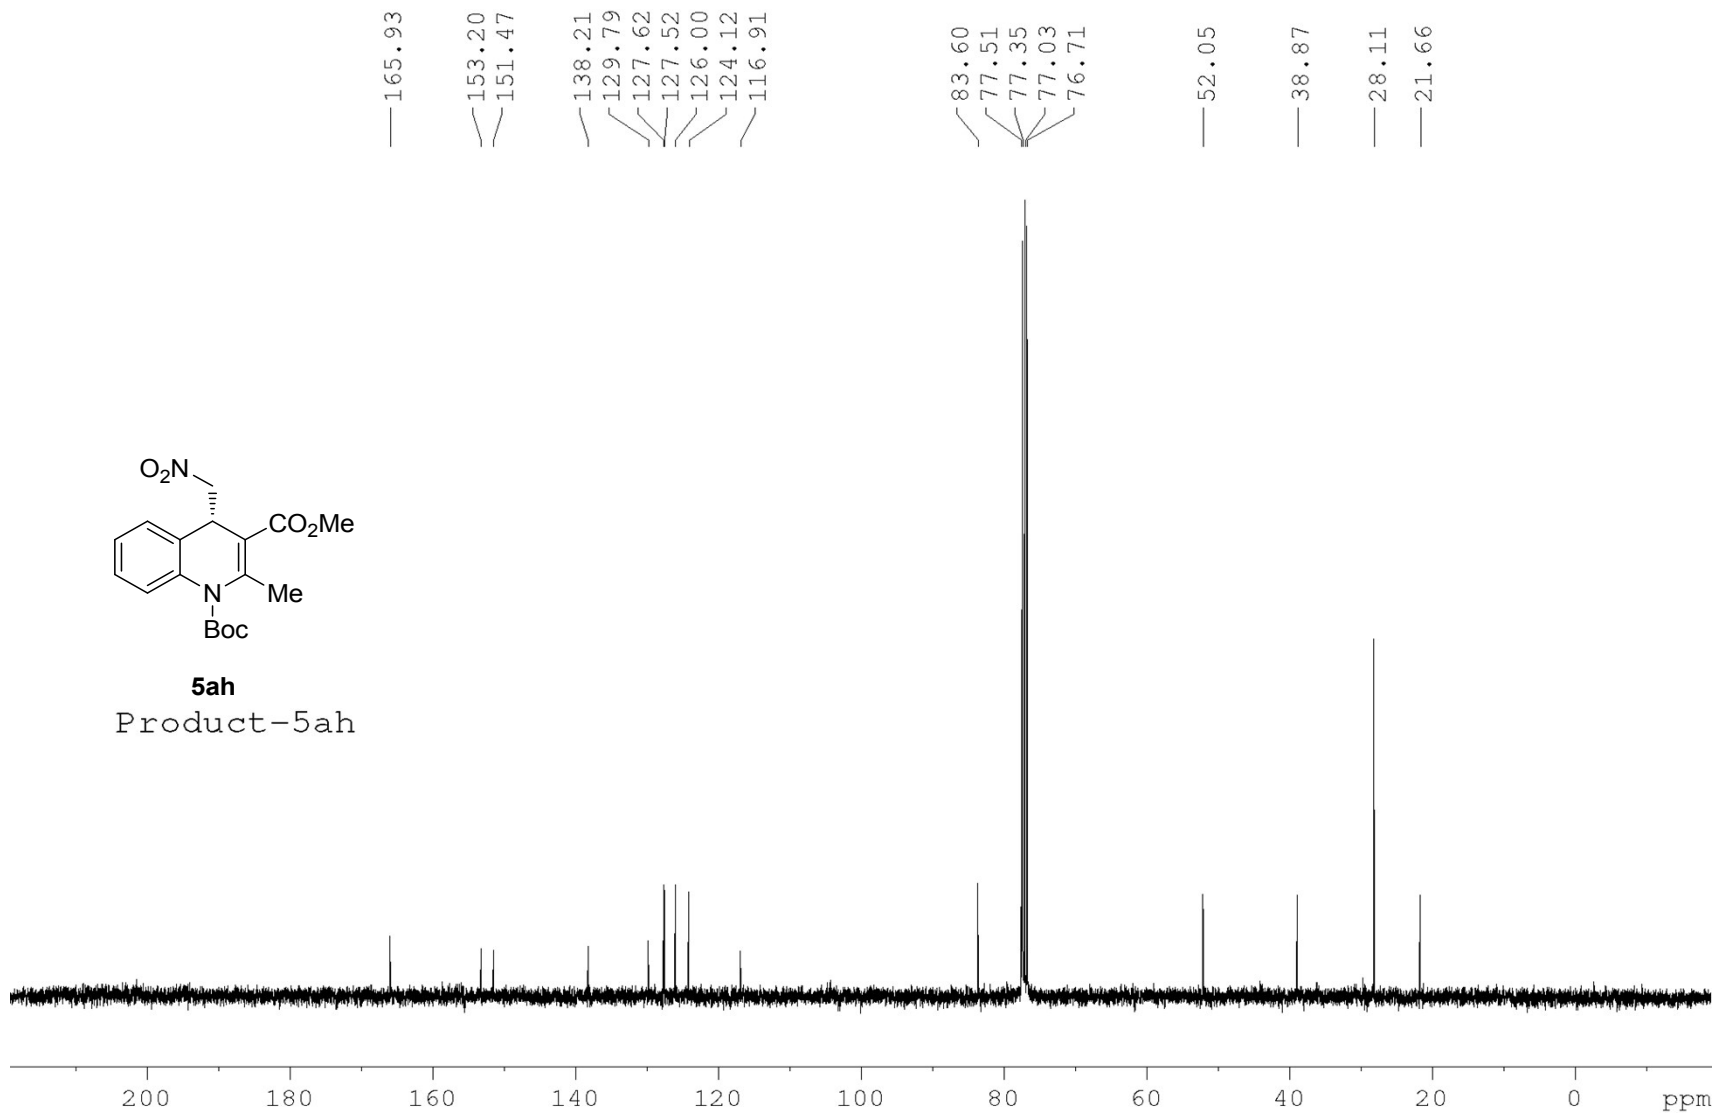

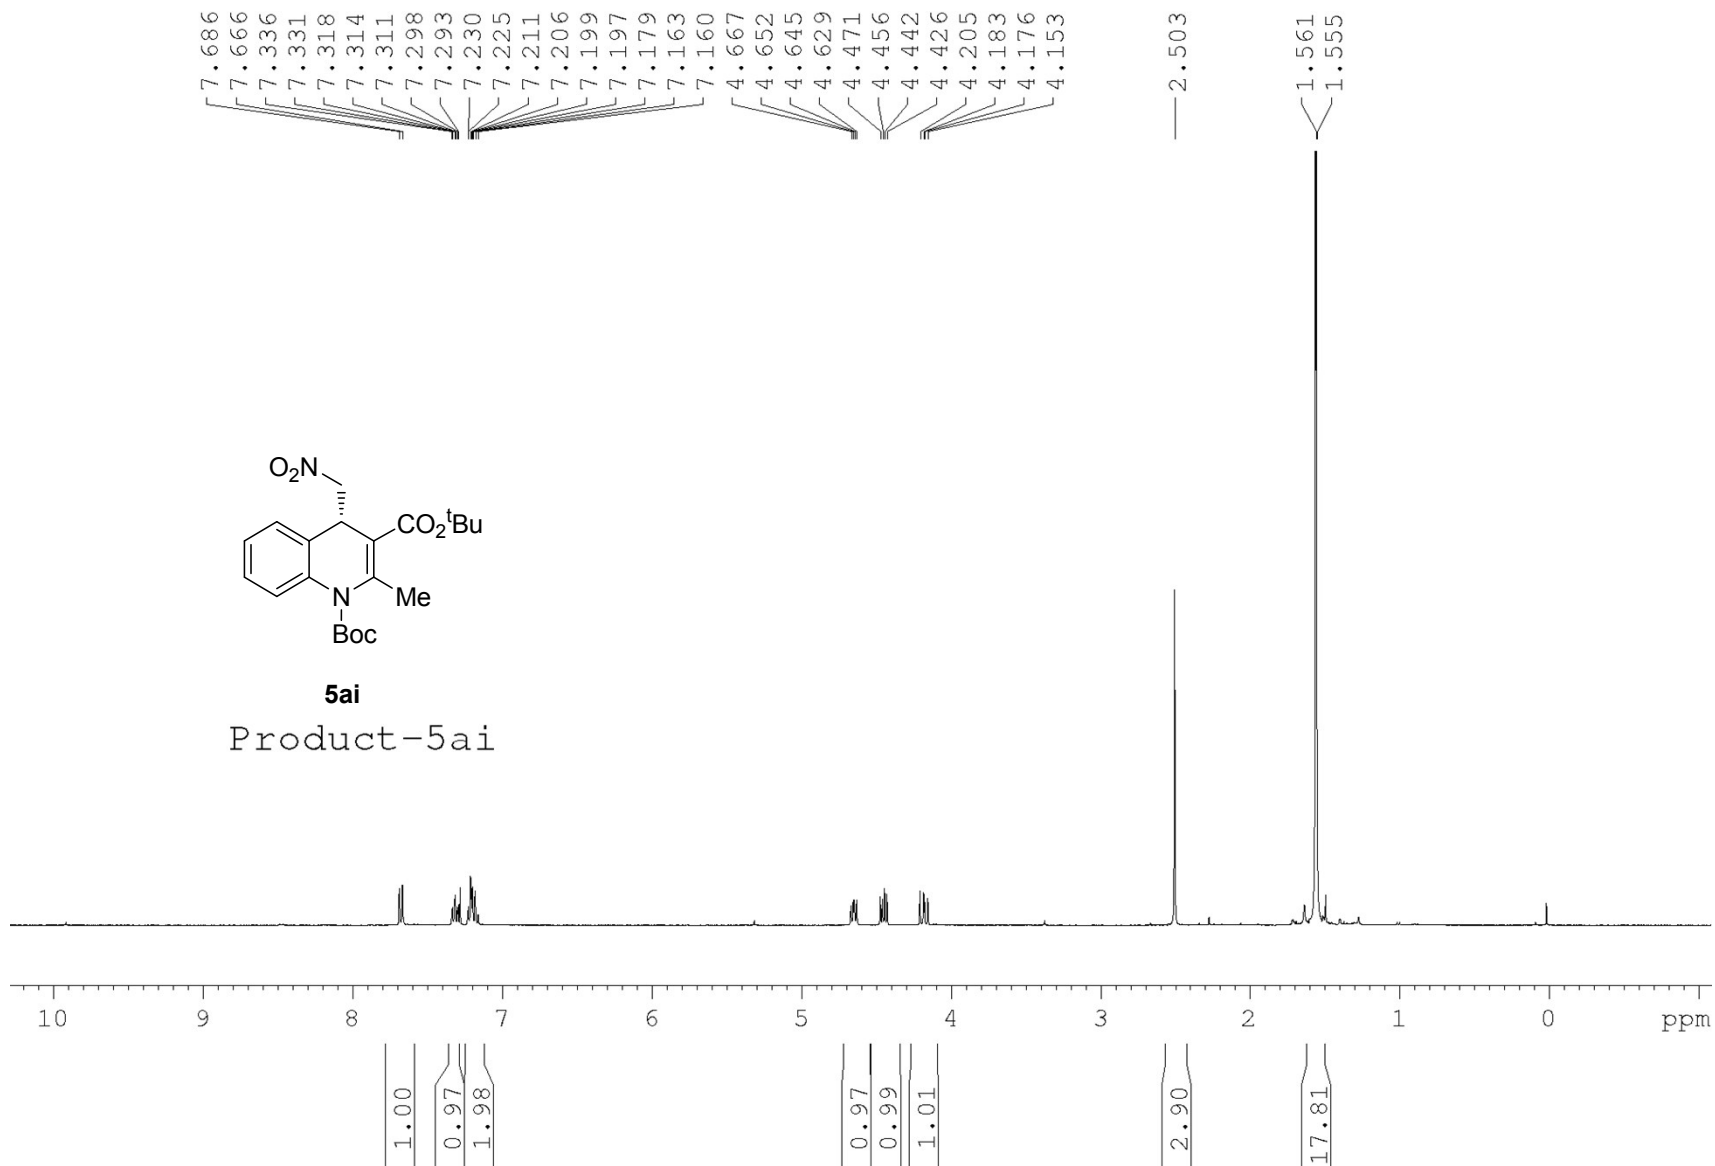

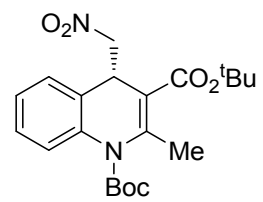

**5ai**

Product-5ai

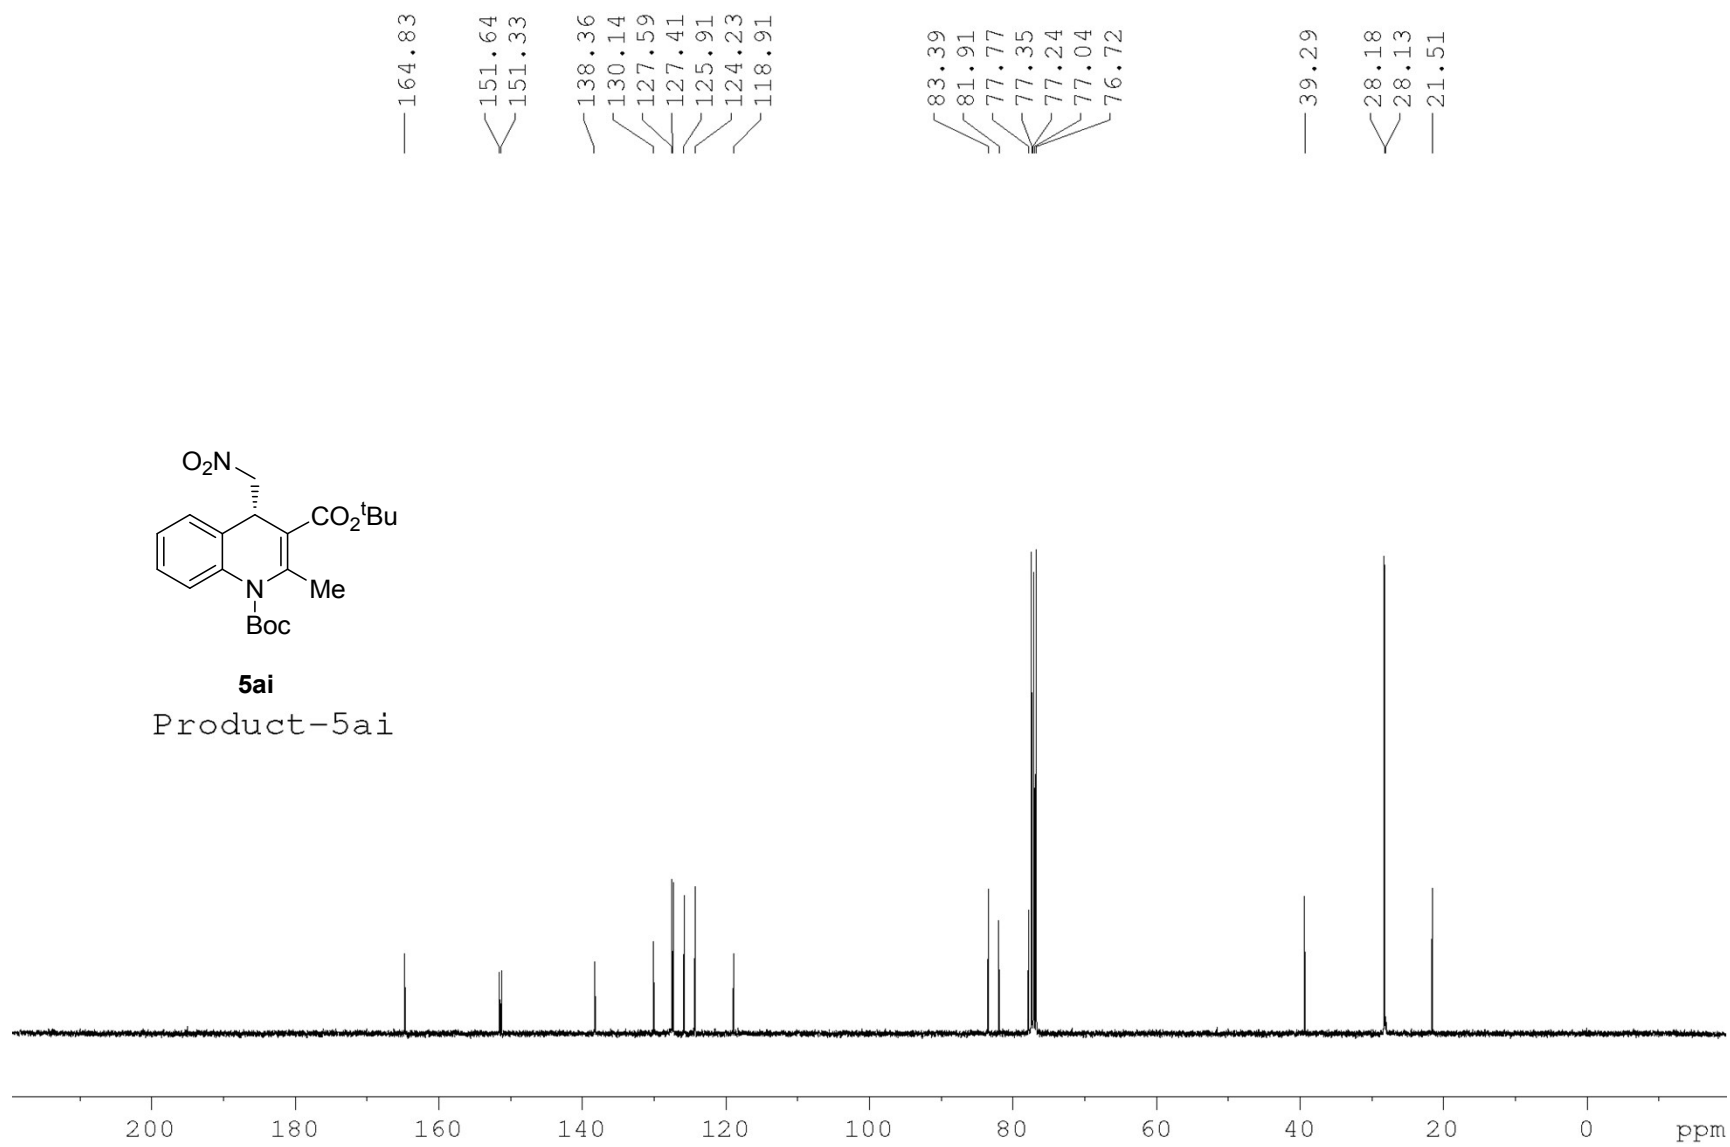

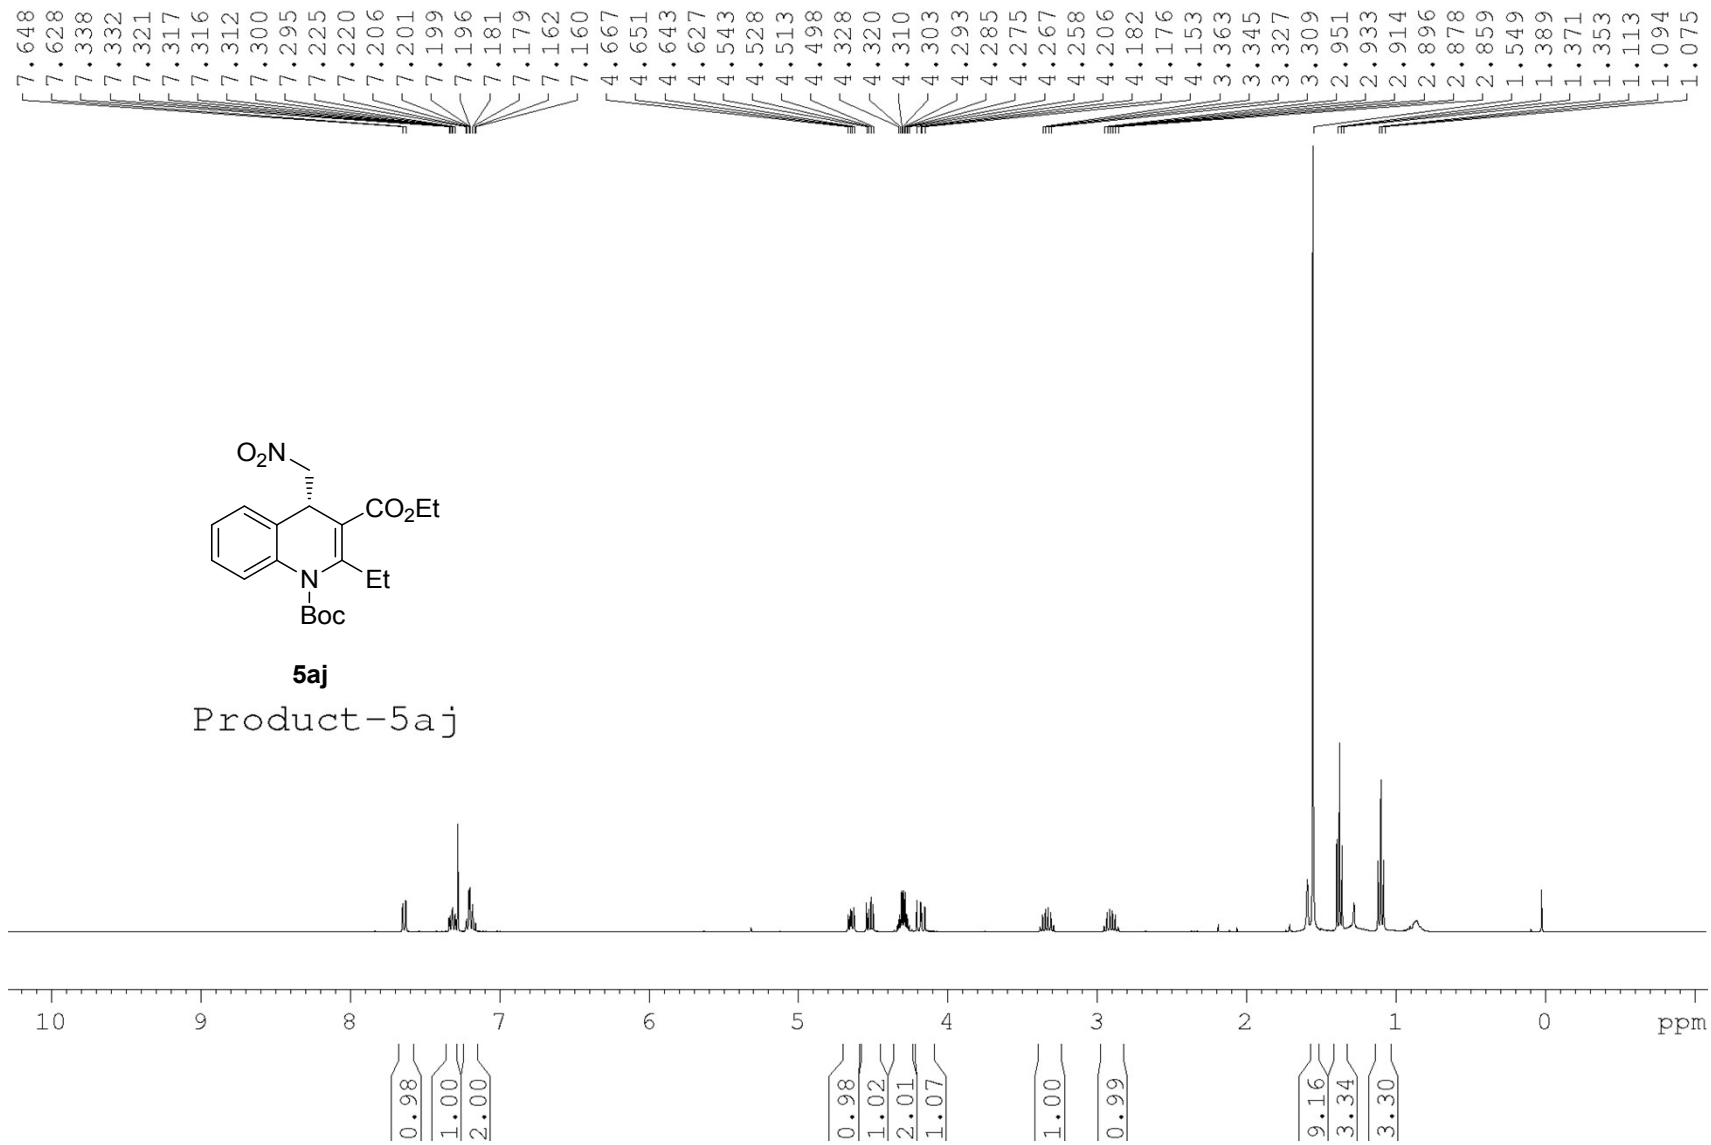



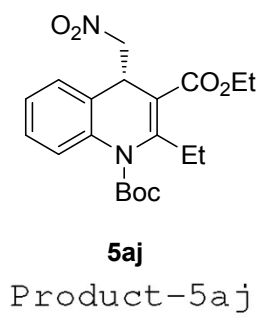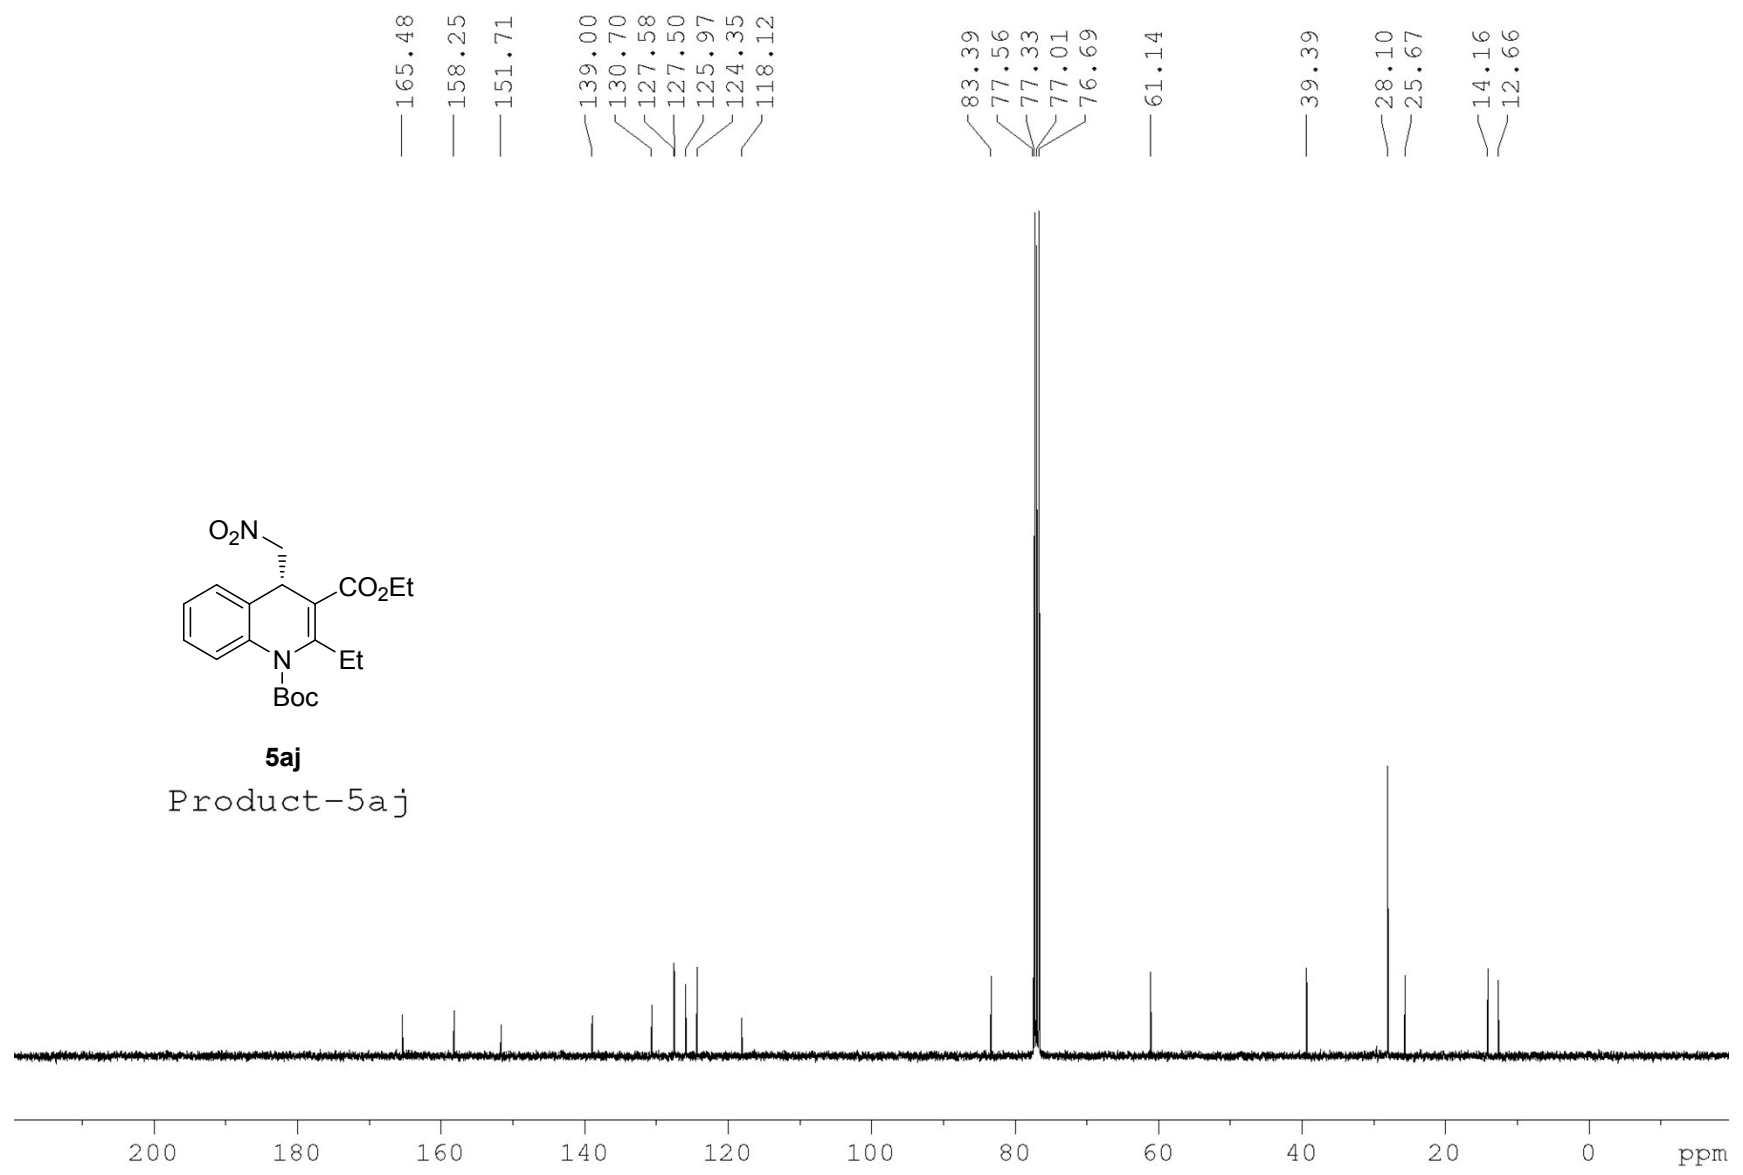

7.638  
7.618  
7.335  
7.330  
7.318  
7.313  
7.310  
7.297  
7.280  
7.224  
7.219  
7.205  
7.200  
7.196  
7.194  
7.179  
7.177  
4.676  
4.661  
4.652  
4.637  
4.543  
4.528  
4.513  
4.498  
4.324  
4.317  
4.306  
4.299  
4.288  
4.281  
4.270  
4.264  
4.207  
4.184  
4.178  
4.154  
3.359  
3.354  
3.340  
3.337  
3.323  
3.320  
3.302  
2.888  
2.872  
2.868  
2.852  
2.837  
2.832  
2.816  
1.548  
1.389  
1.372  
1.354  
0.890  
0.870  
0.852

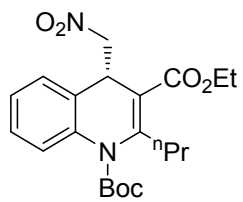

**5ak**

Product-5ak

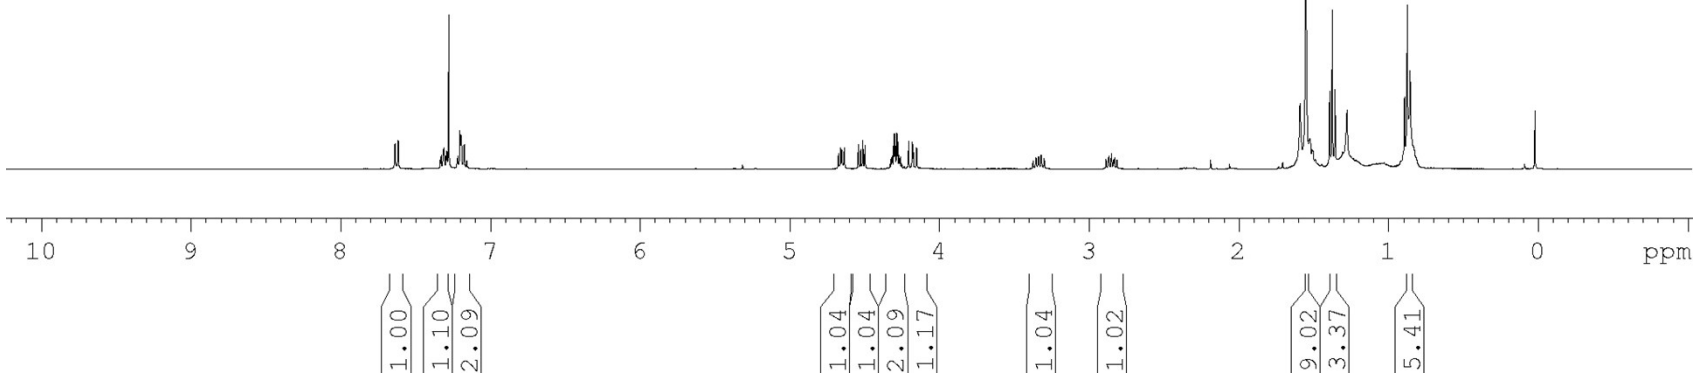

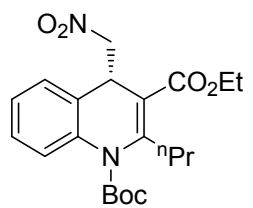

**5ak**  
Product-5ak

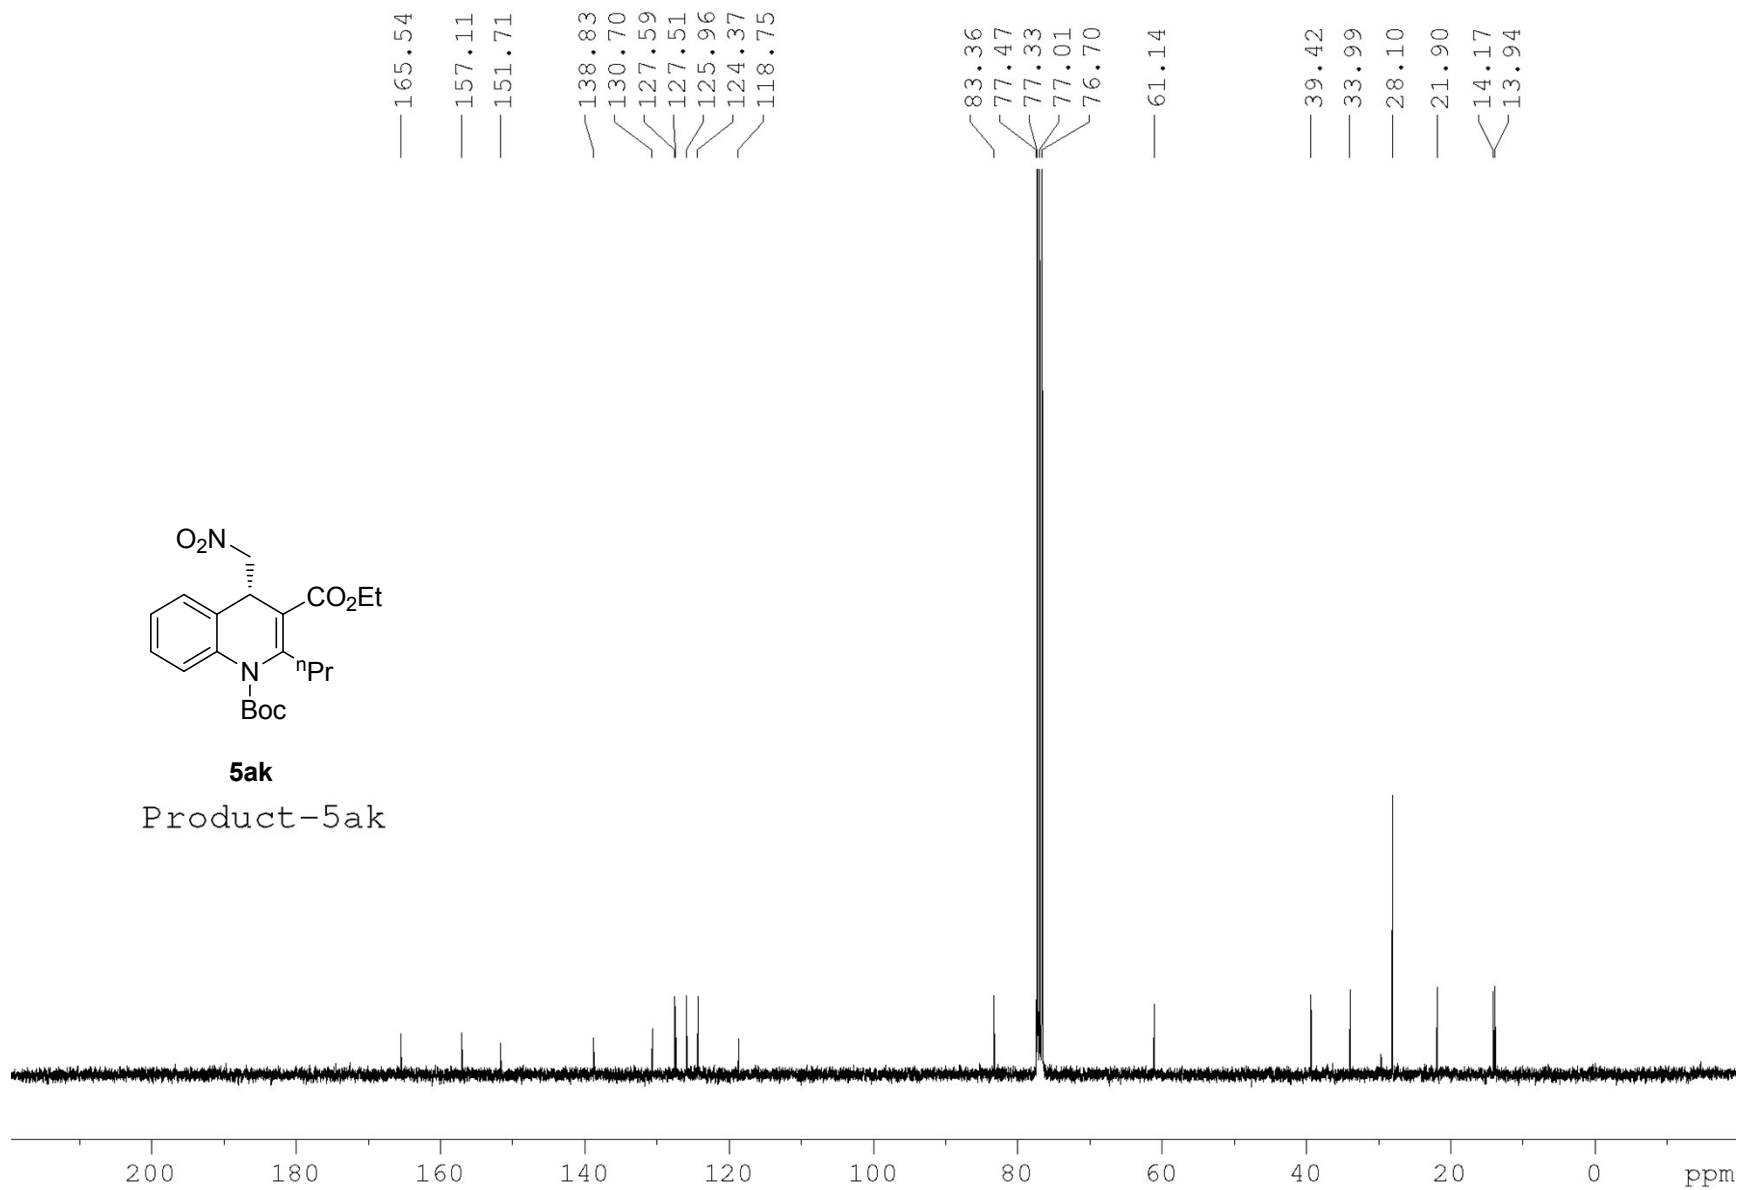

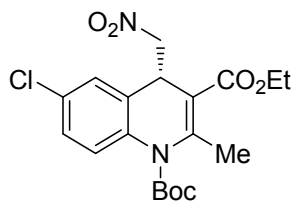

**5dg**

Product-5dg

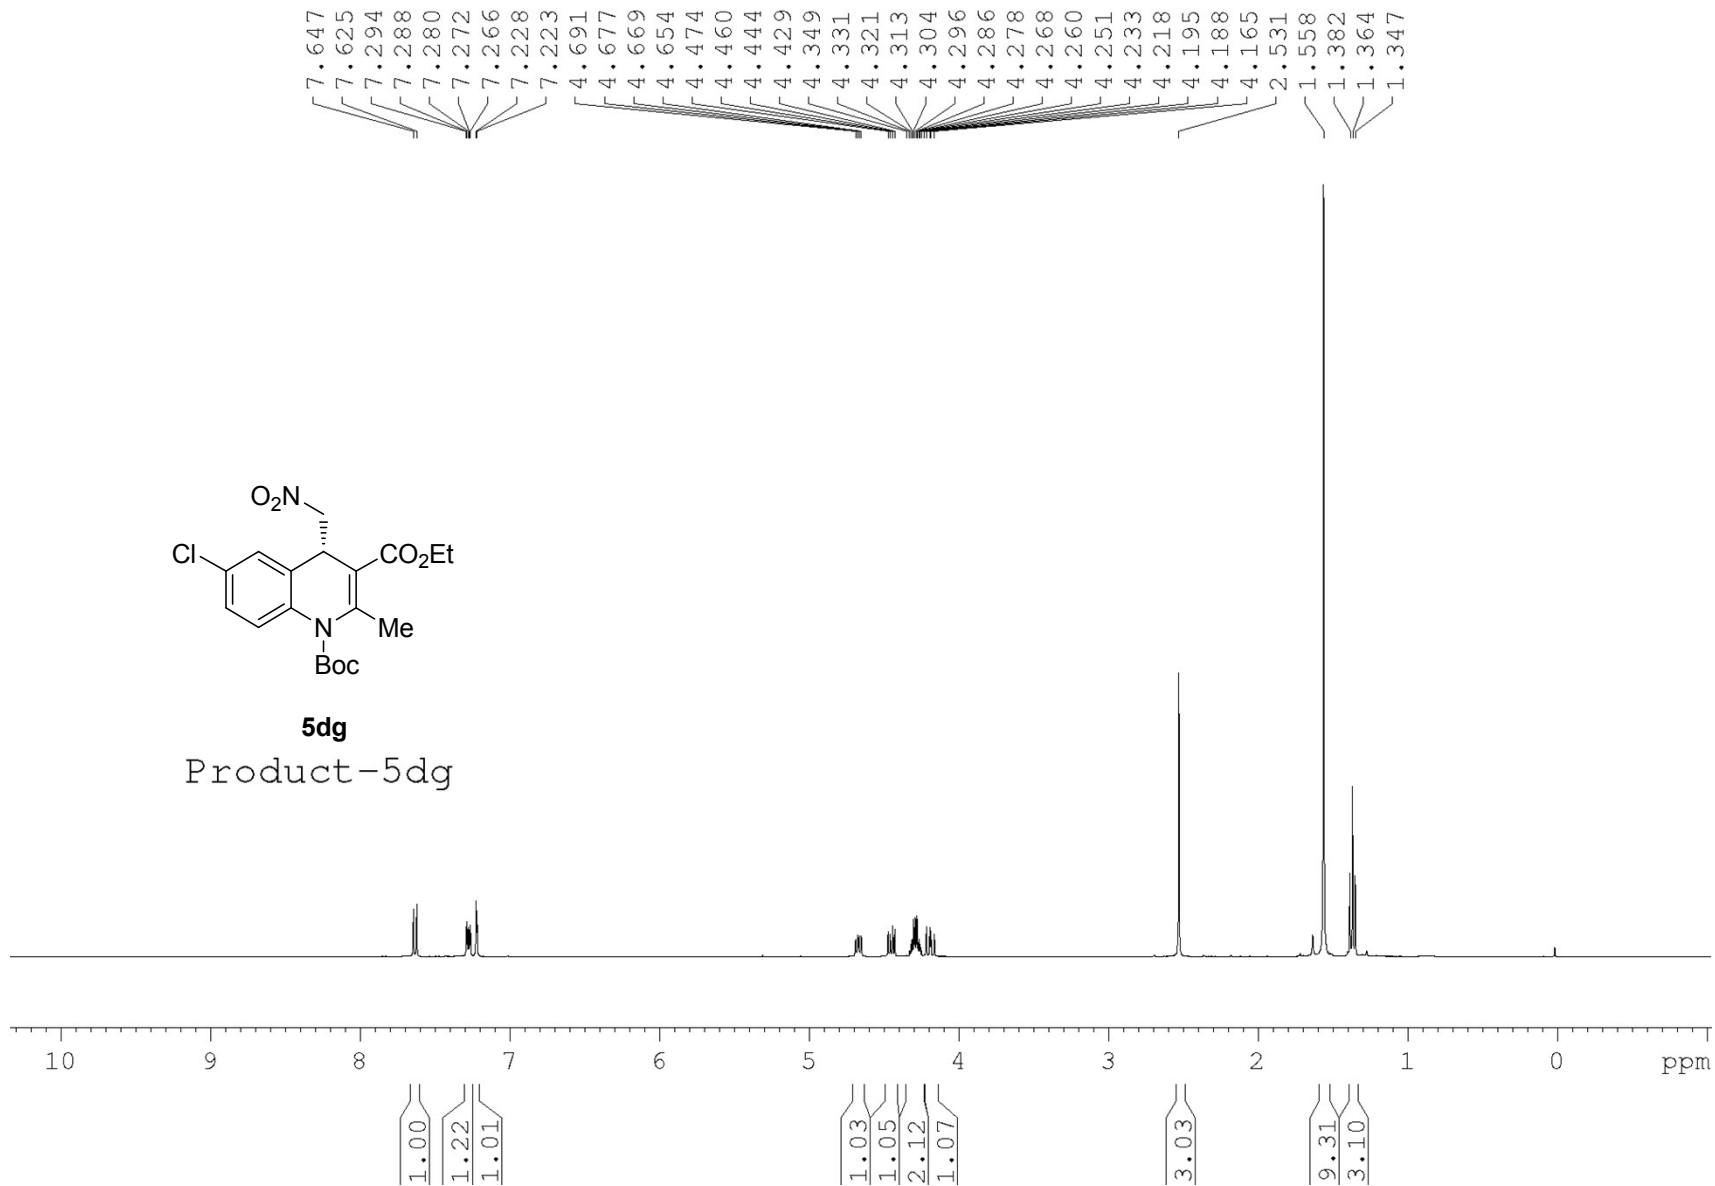

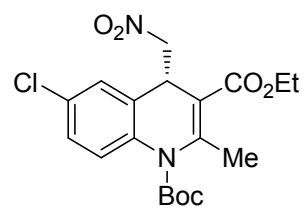

**5dg**

Product-5dg

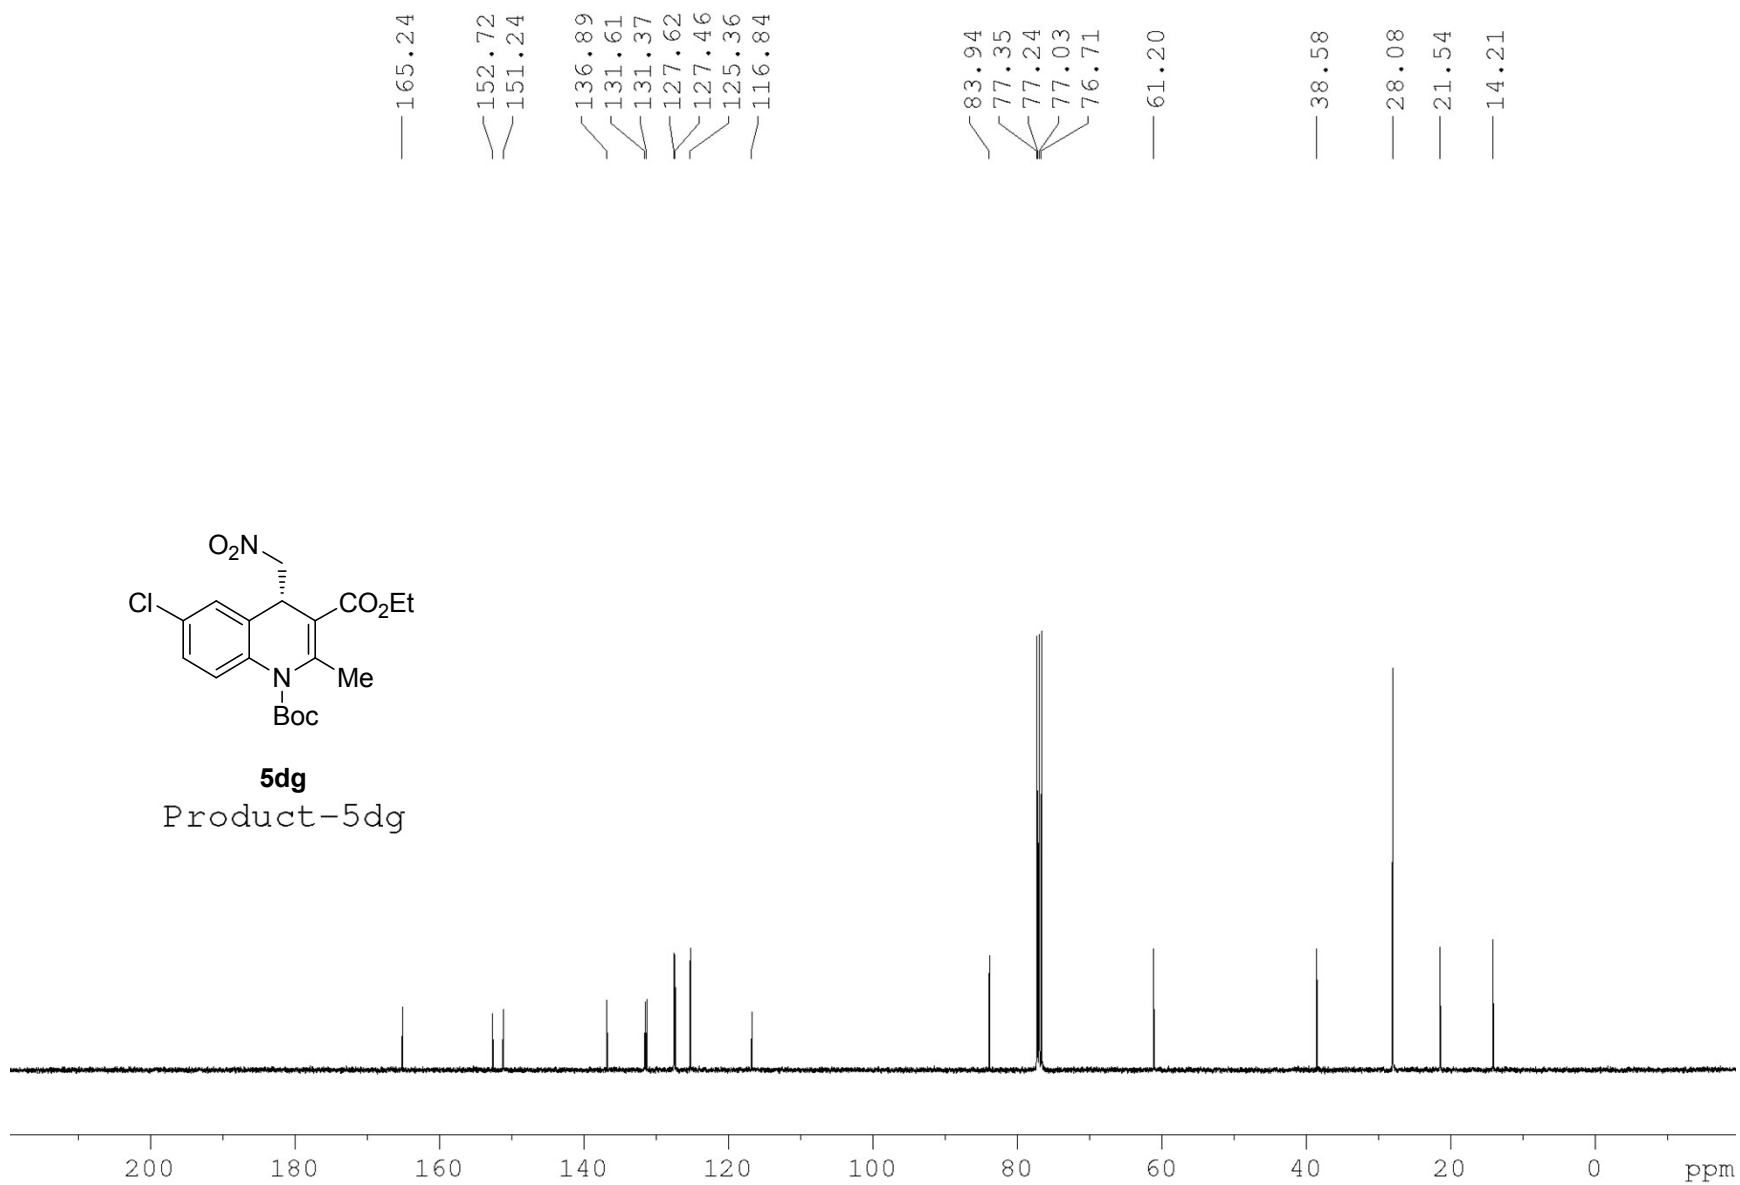

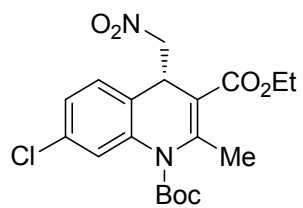

**5eg**

Product-5eg

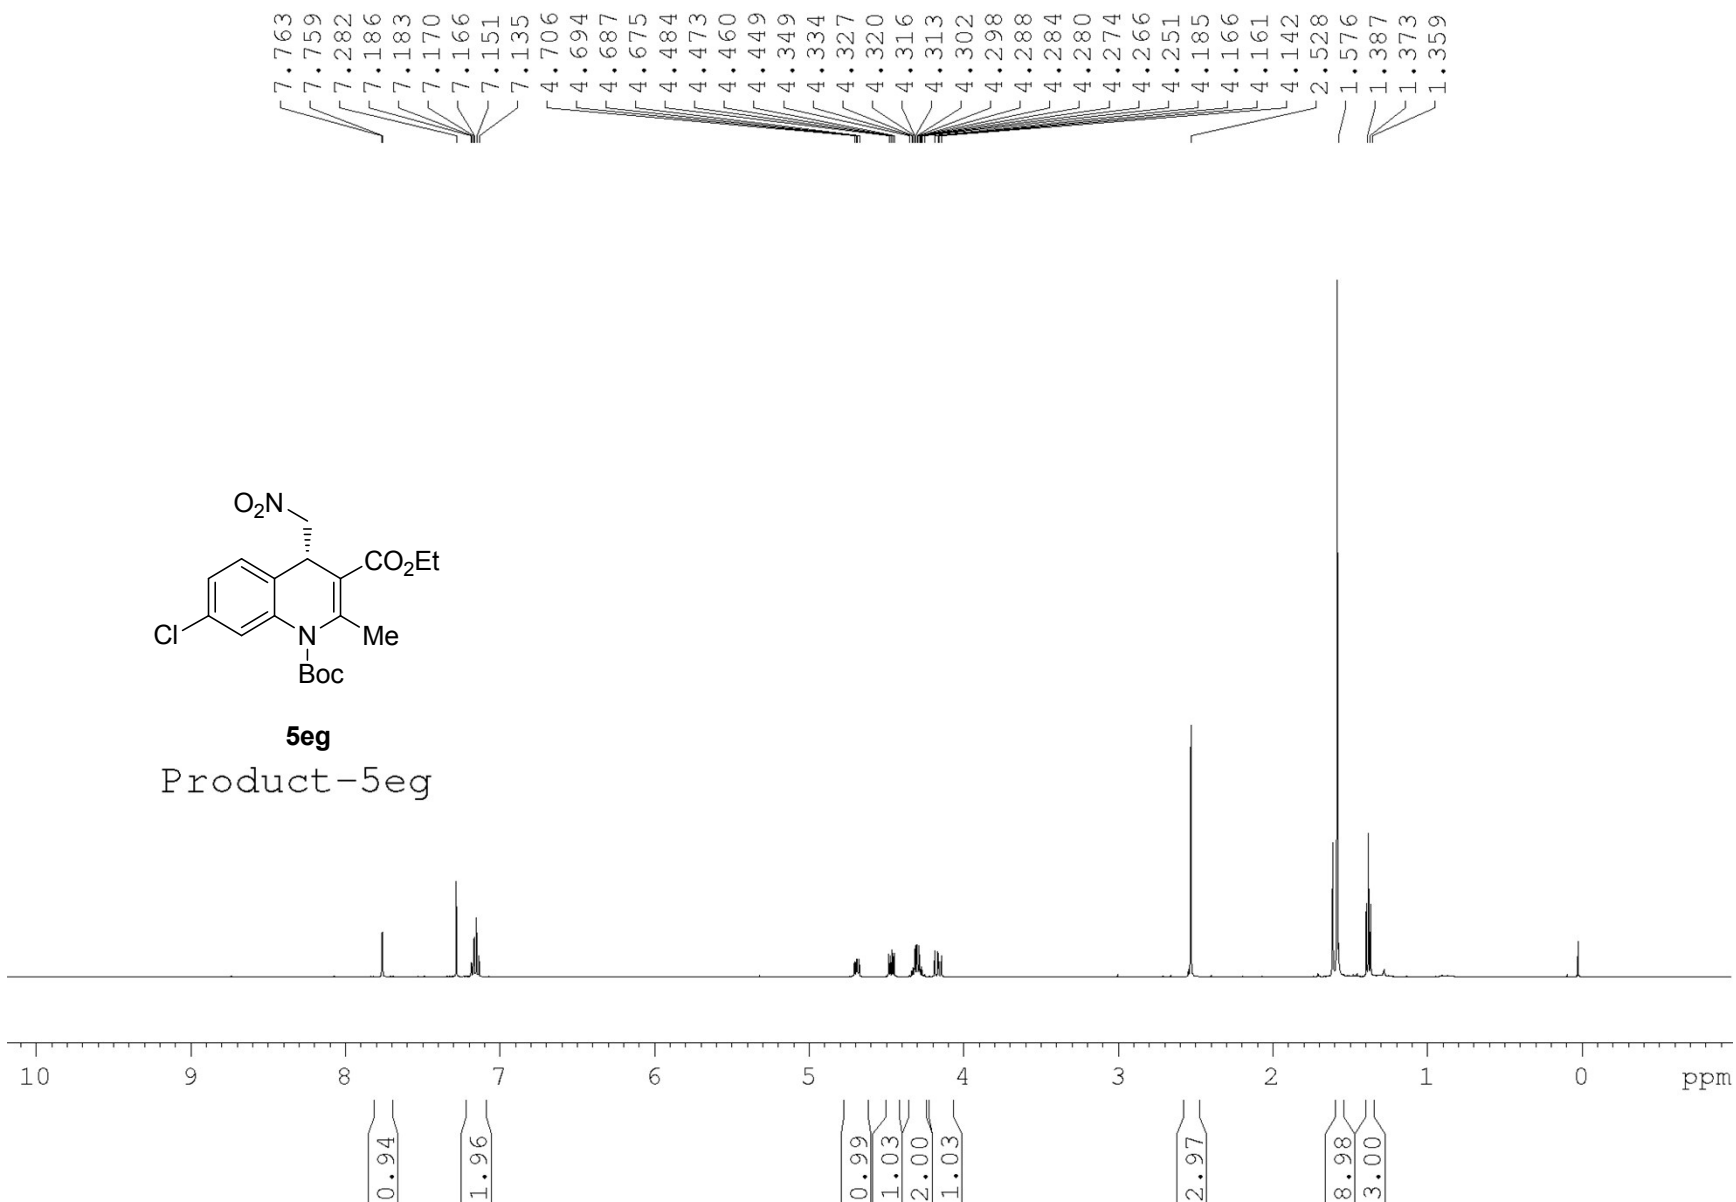

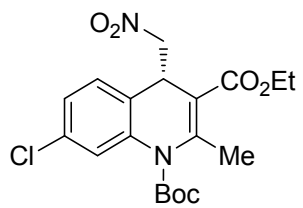

**5eg**

Product-5eg

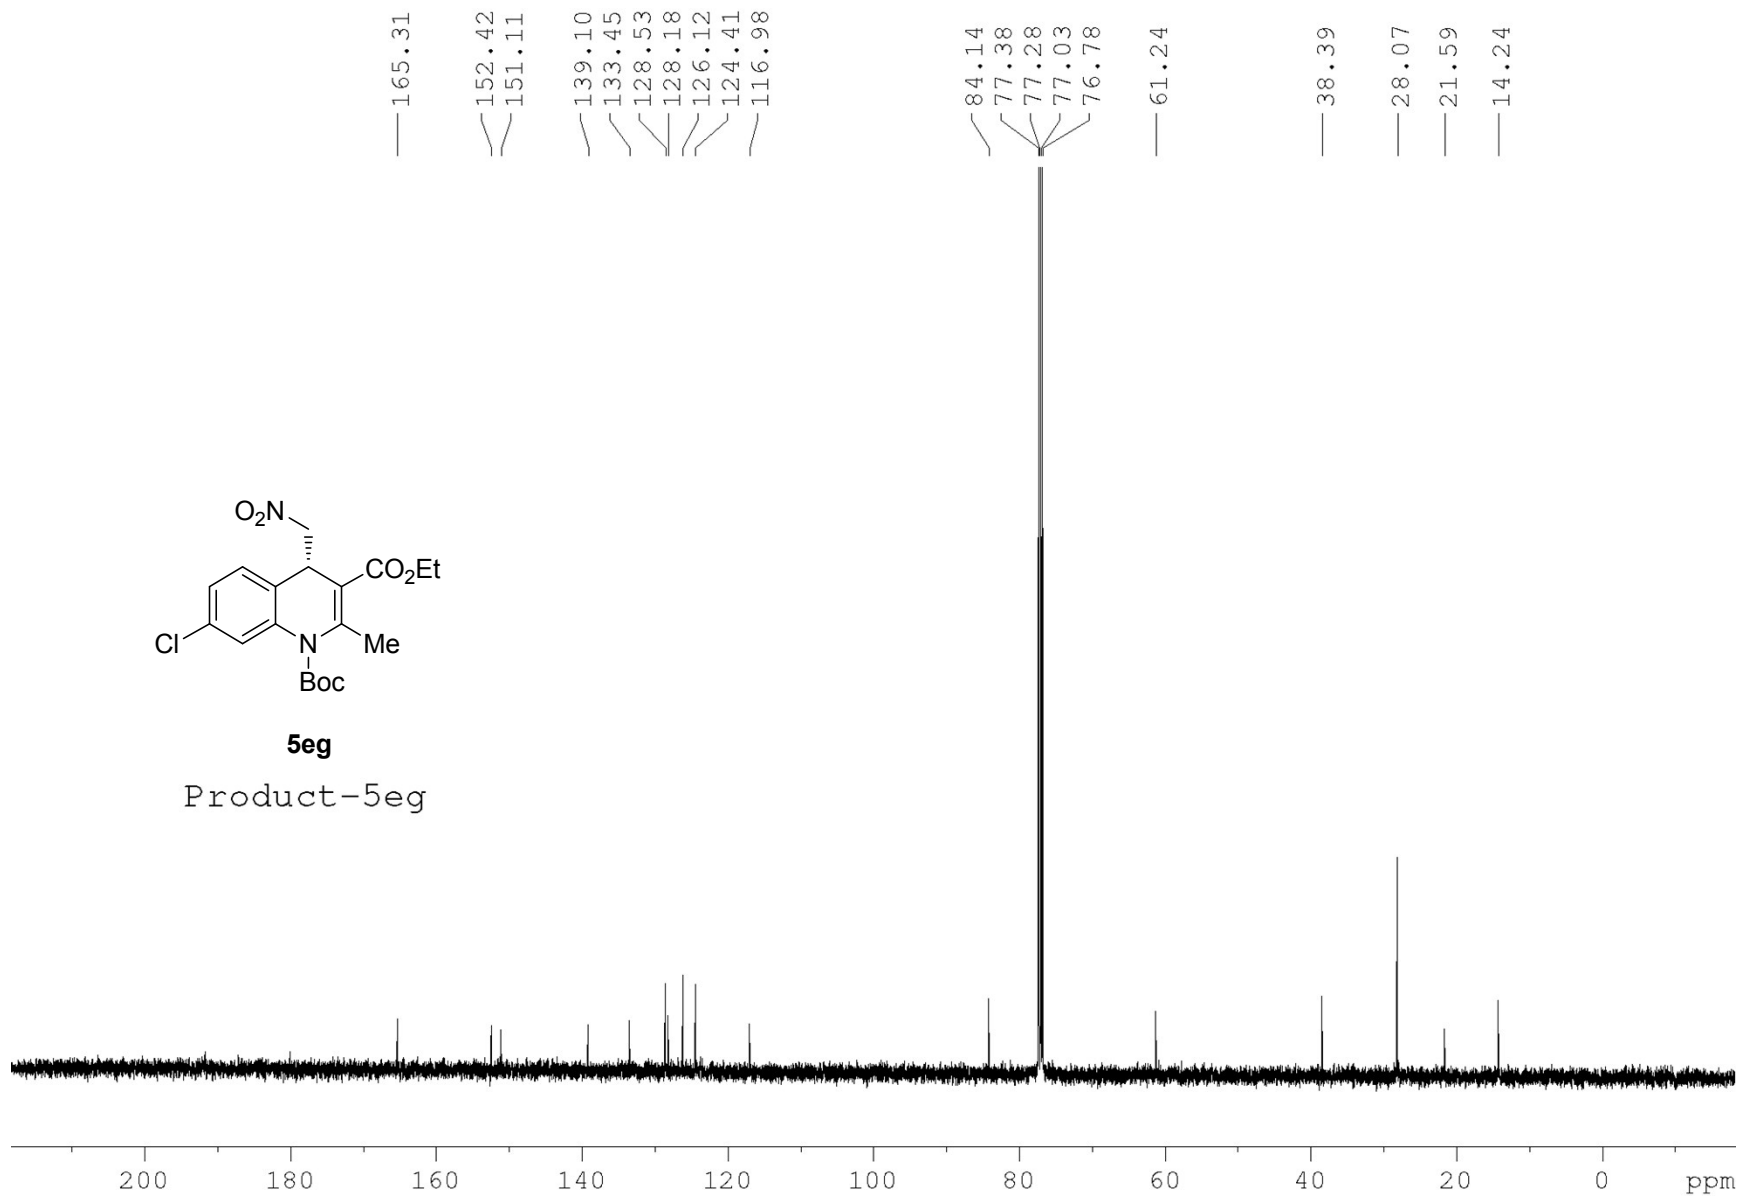

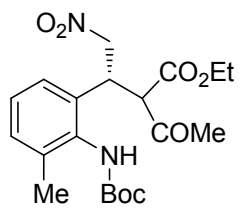

**4gg**

Product-4gg

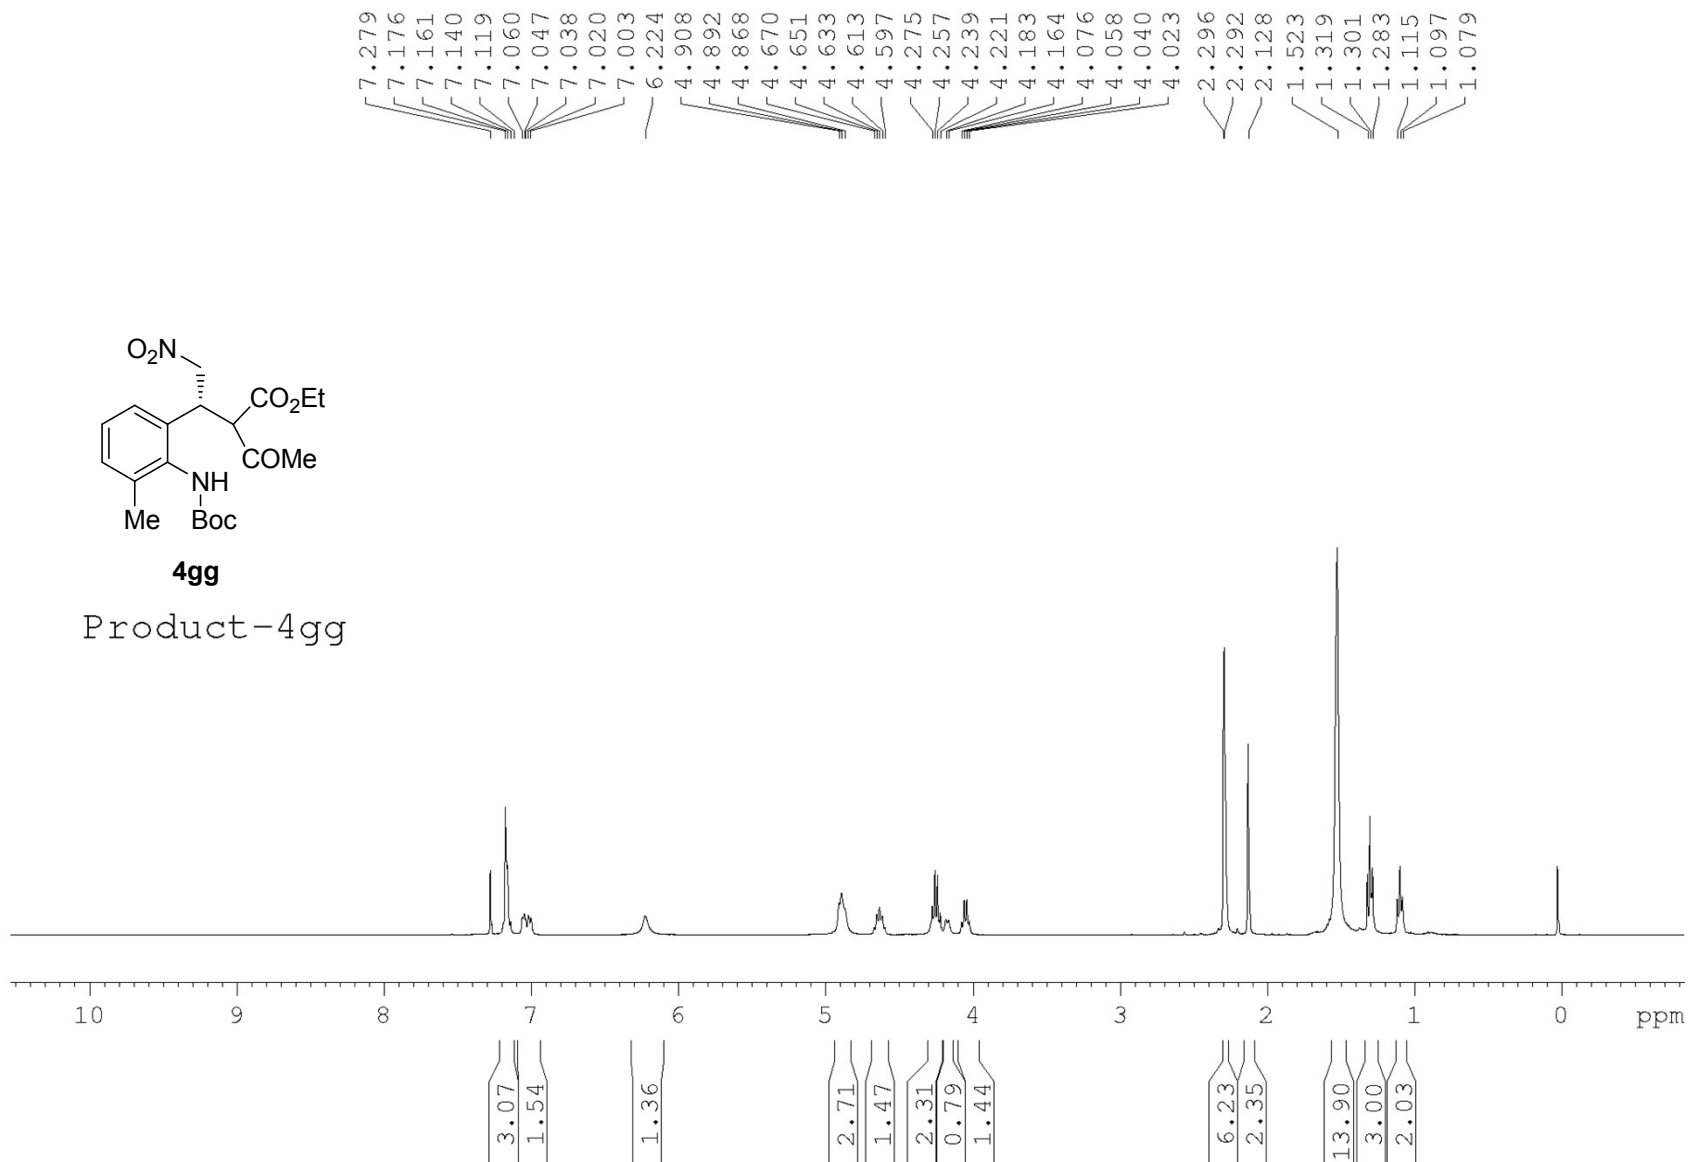



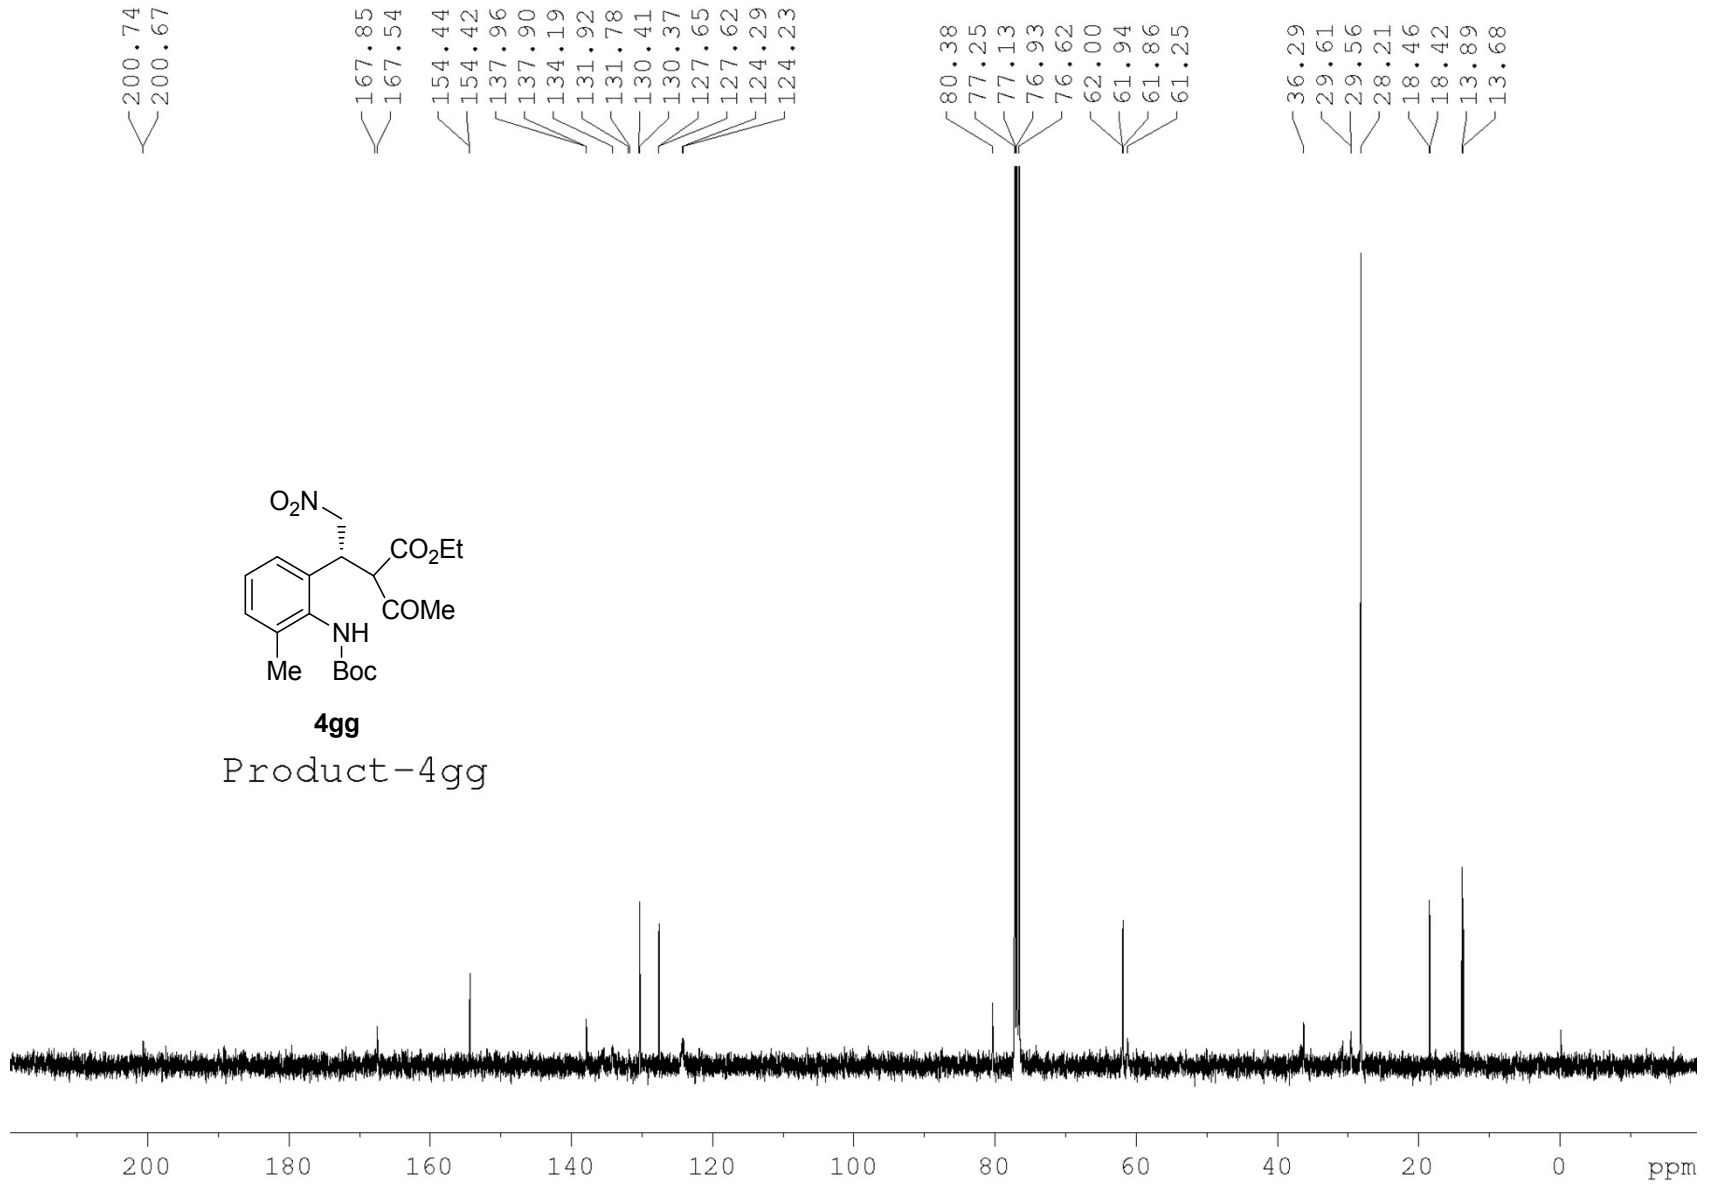

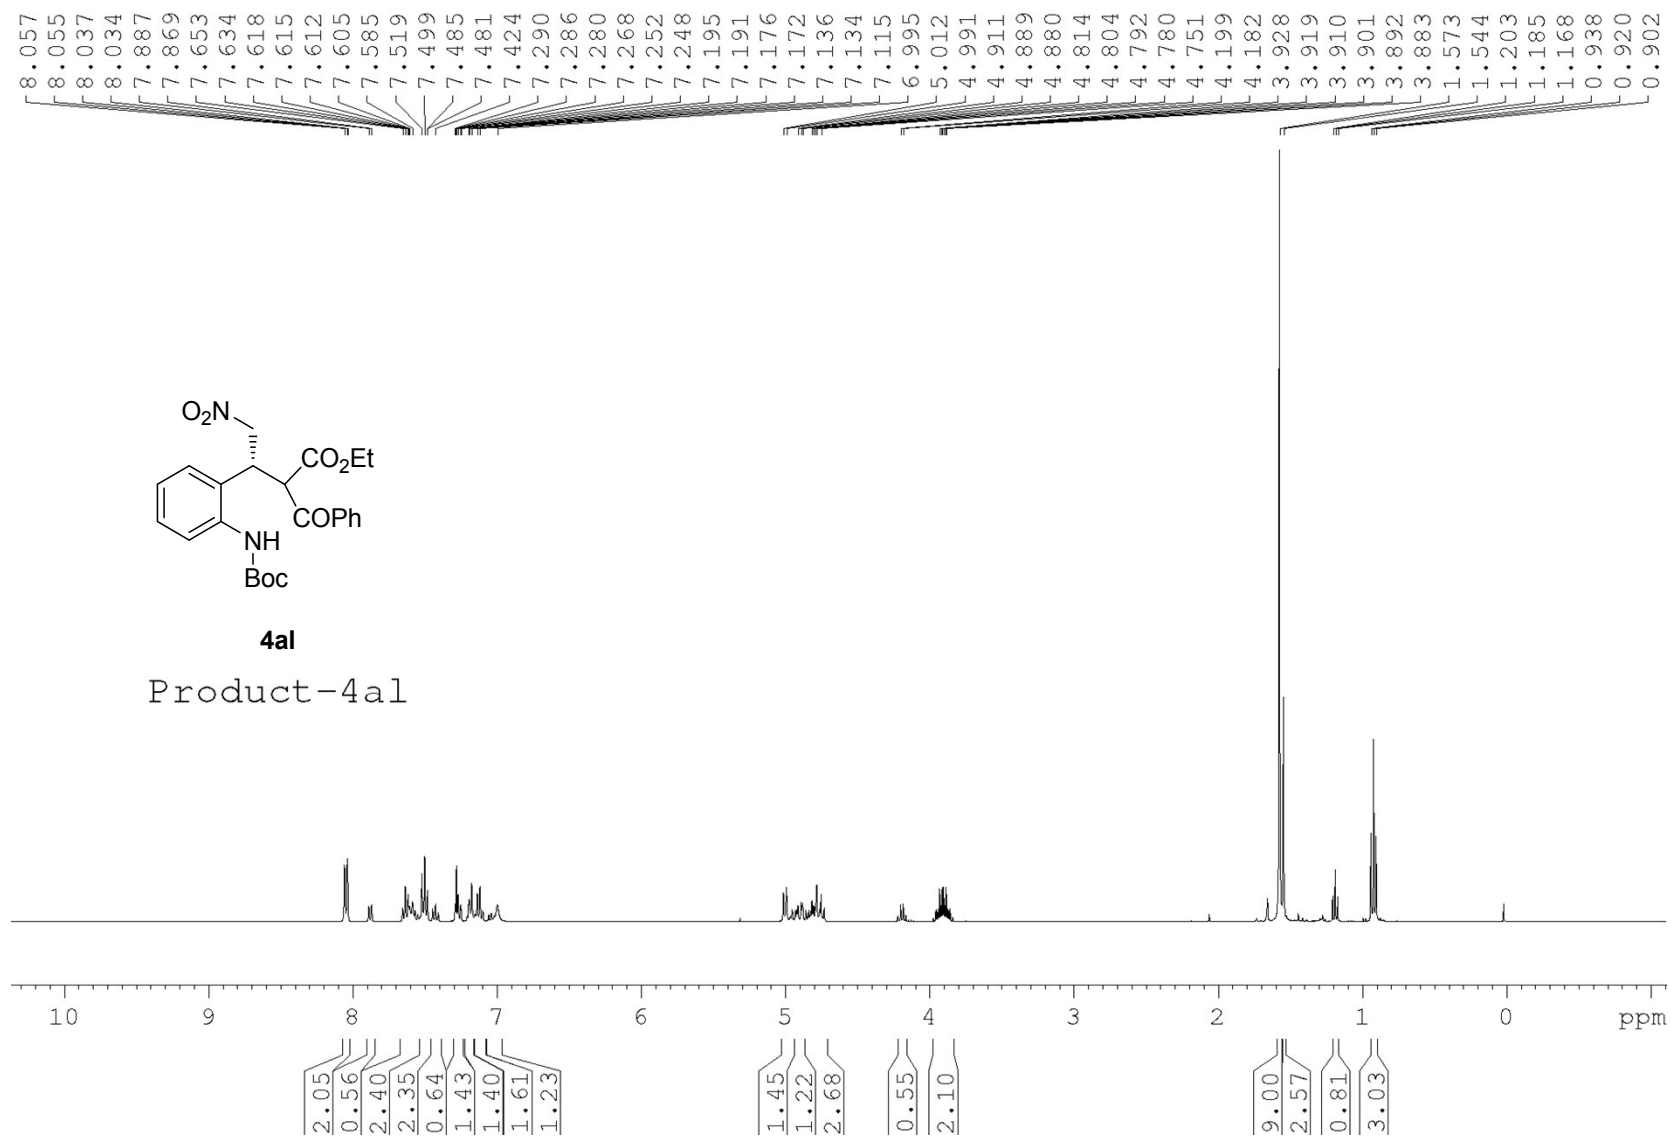

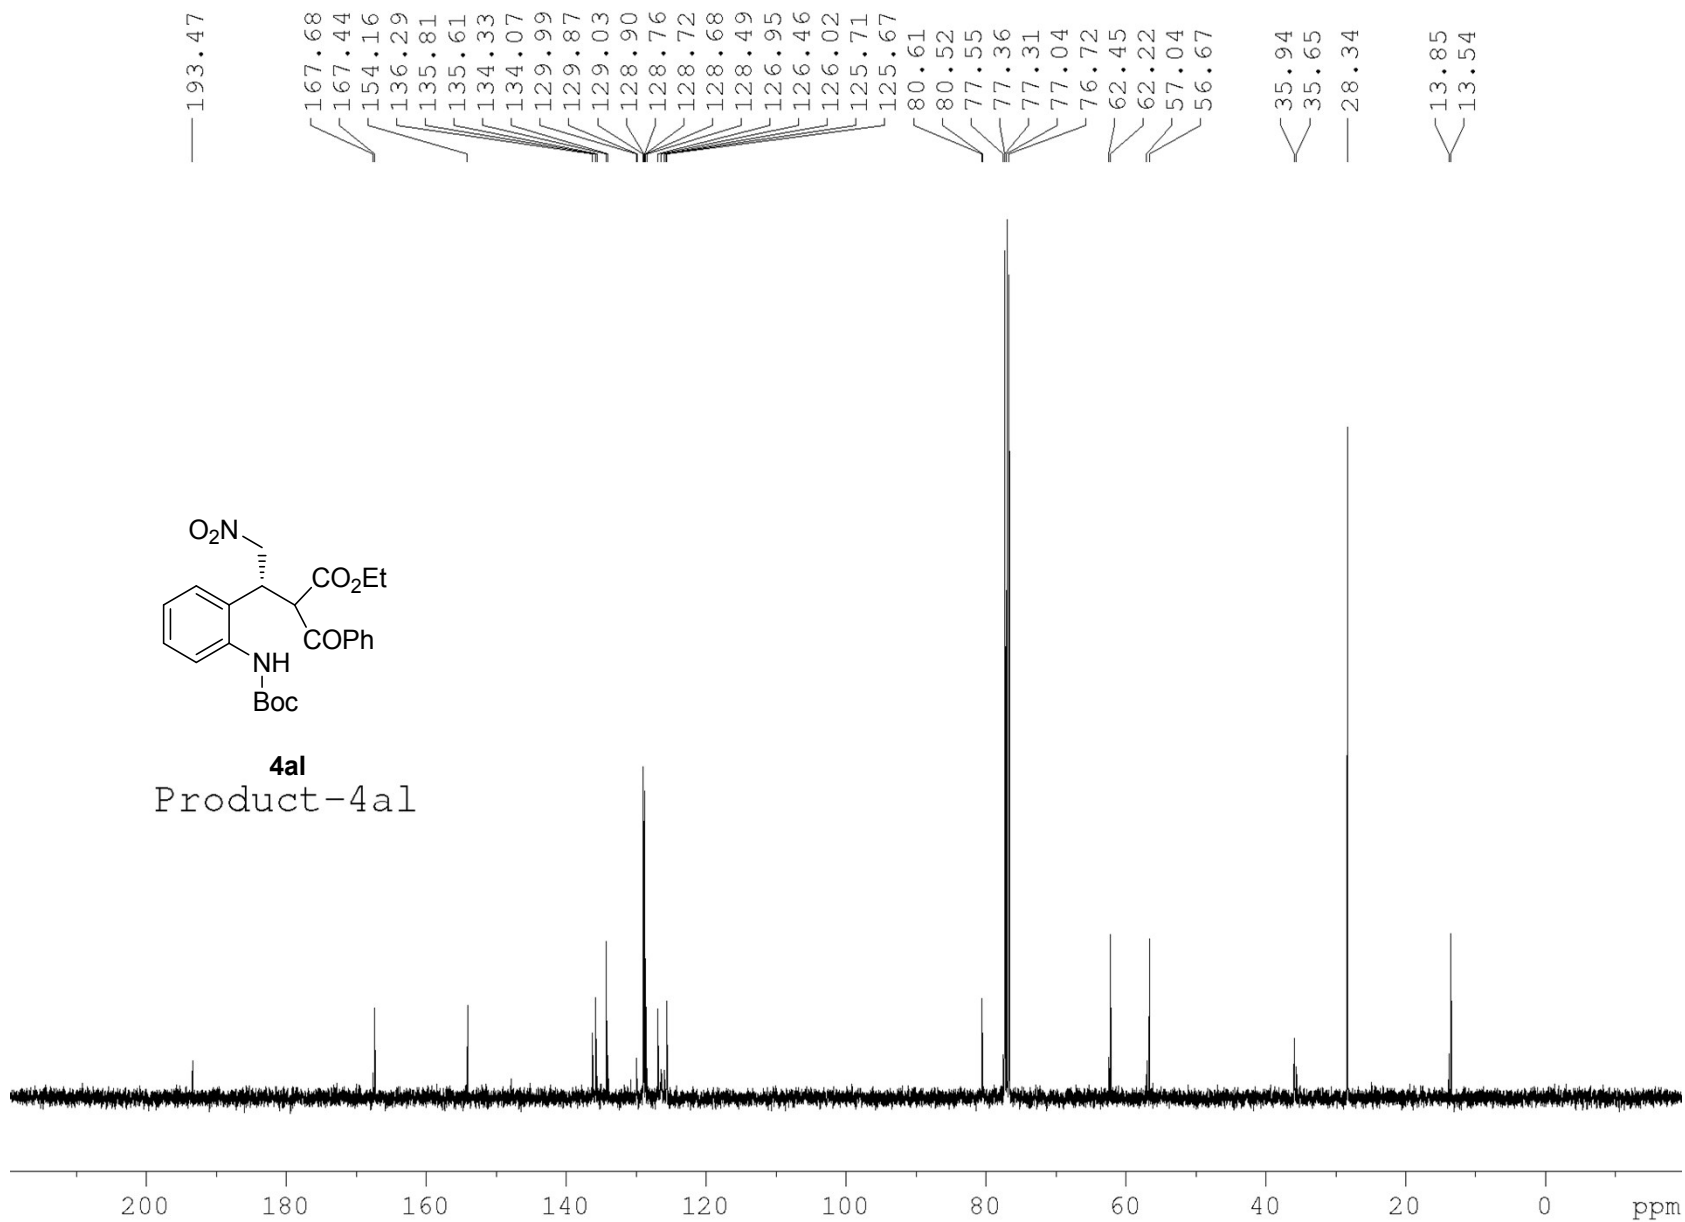

7.326  
7.324  
7.310  
7.300  
7.288  
7.282  
7.274  
7.265  
5.205  
5.197  
5.178  
5.170  
5.090  
5.078  
5.065  
5.053  
5.048  
5.040  
5.026  
5.021  
4.999  
4.091  
4.083  
4.069  
4.061  
2.380  
2.371  
2.368  
2.353  
2.343  
2.340  
2.336  
2.332  
2.035  
2.017  
2.007  
1.997  
1.991  
1.980  
1.976  
1.964  
1.957  
1.950  
1.938  
1.934  
1.922  
1.908  
1.905  
1.891  
1.852  
1.843  
1.837  
1.828  
1.819  
1.269  
1.259  
1.257  
1.247

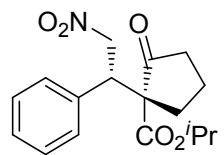

**4hb**  
Product-4hb

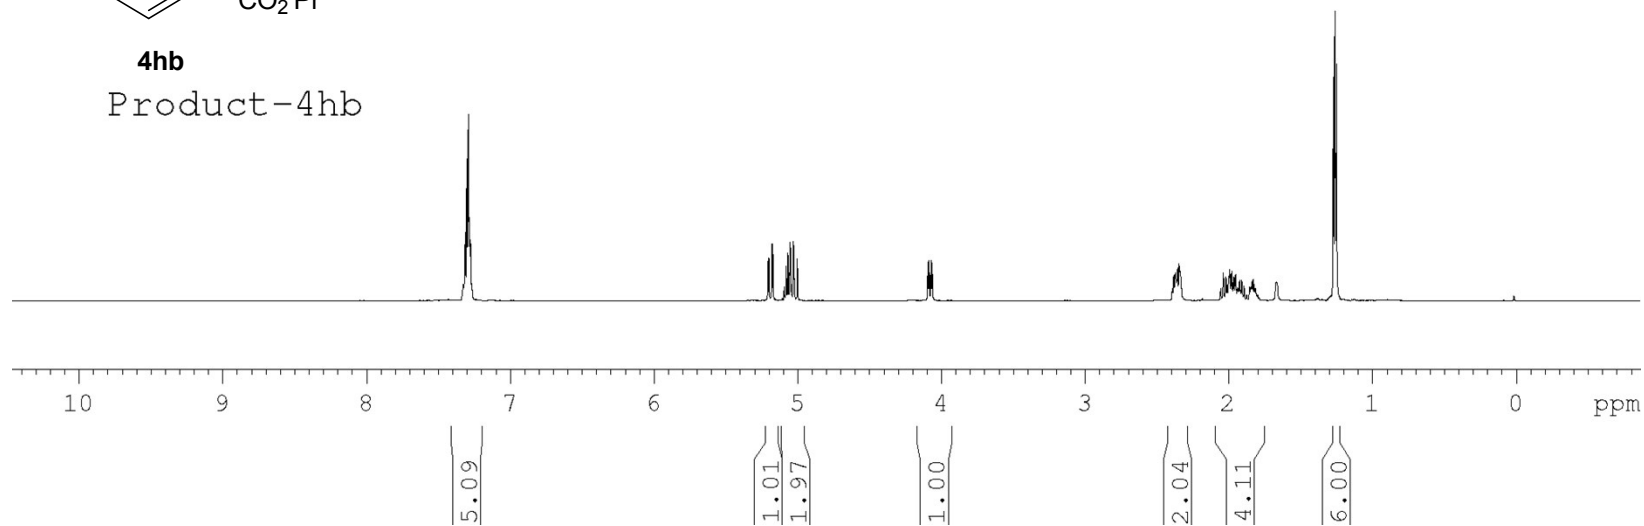

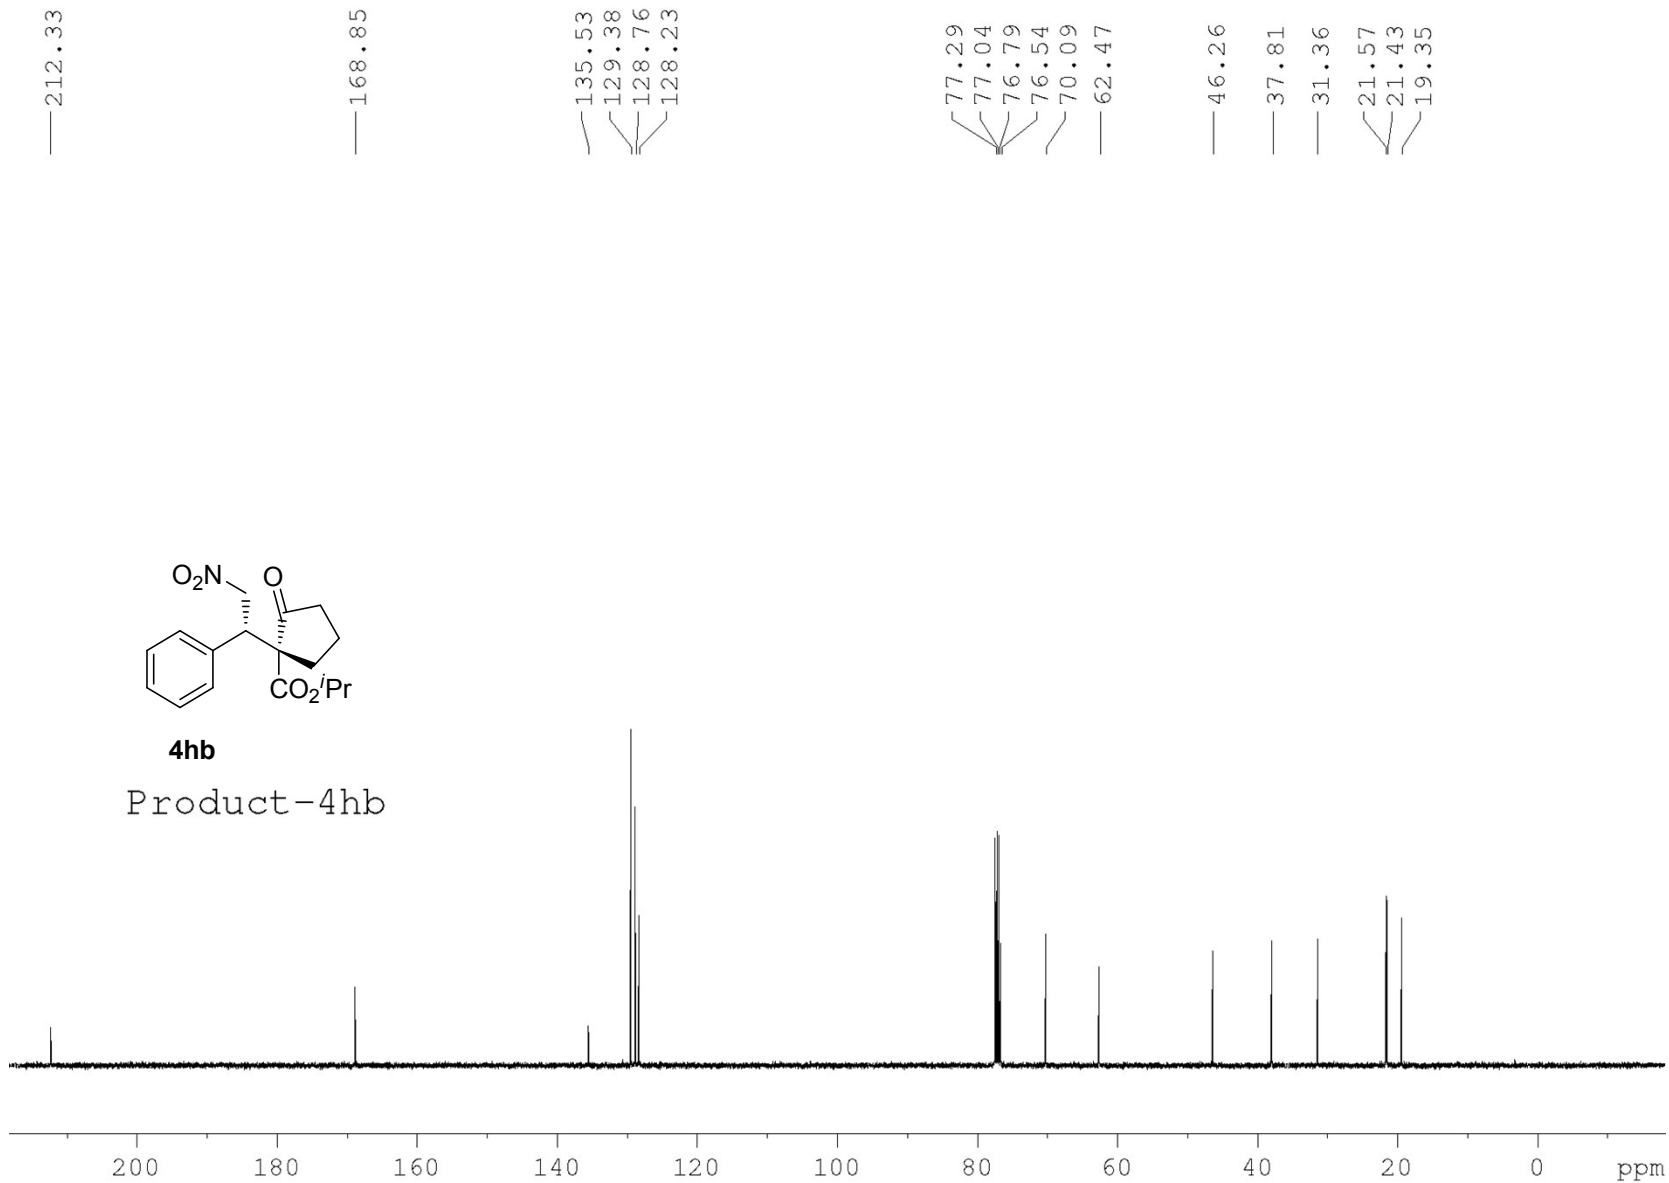

7.378  
7.363  
7.250  
7.234  
7.218  
6.957  
6.942  
6.502  
5.196  
5.189  
5.169  
5.162  
5.101  
5.089  
5.076  
5.063  
5.051  
5.035  
5.013  
5.008  
4.986  
4.031  
4.023  
4.009  
4.002  
2.396  
2.389  
2.379  
2.368  
2.359  
2.351  
2.343  
2.120  
2.102  
2.084  
2.064  
2.017  
2.001  
1.989  
1.977  
1.975  
1.950  
1.938  
1.924  
1.921  
1.907  
1.892  
1.883  
1.877  
1.874  
1.868  
1.859  
1.531  
1.282  
1.269  
1.268  
1.255

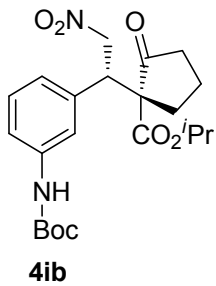

Produuct-4ib

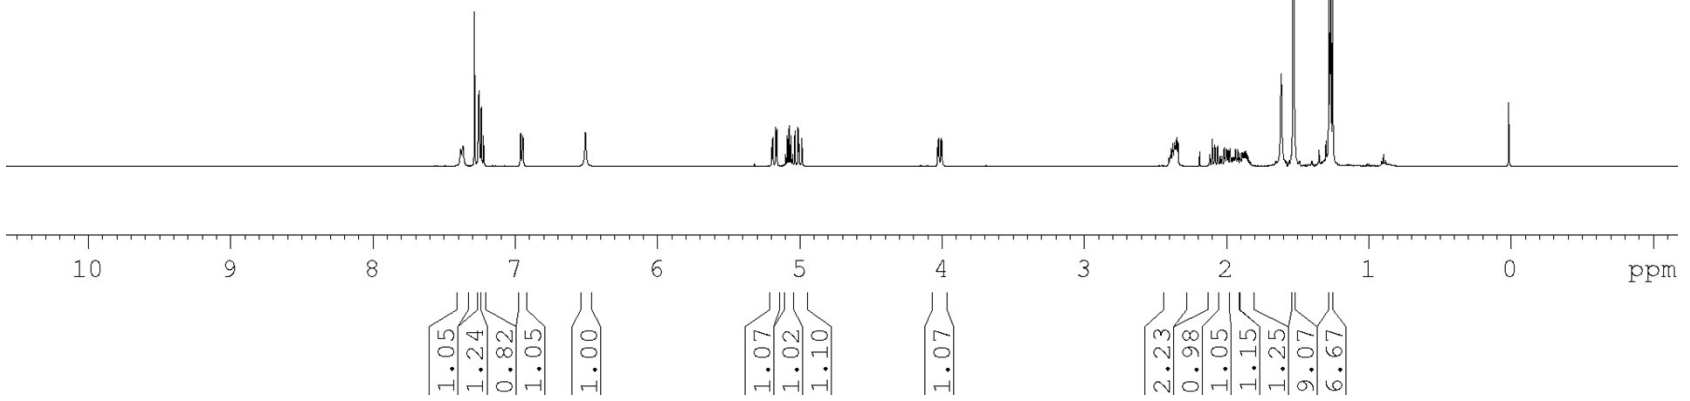

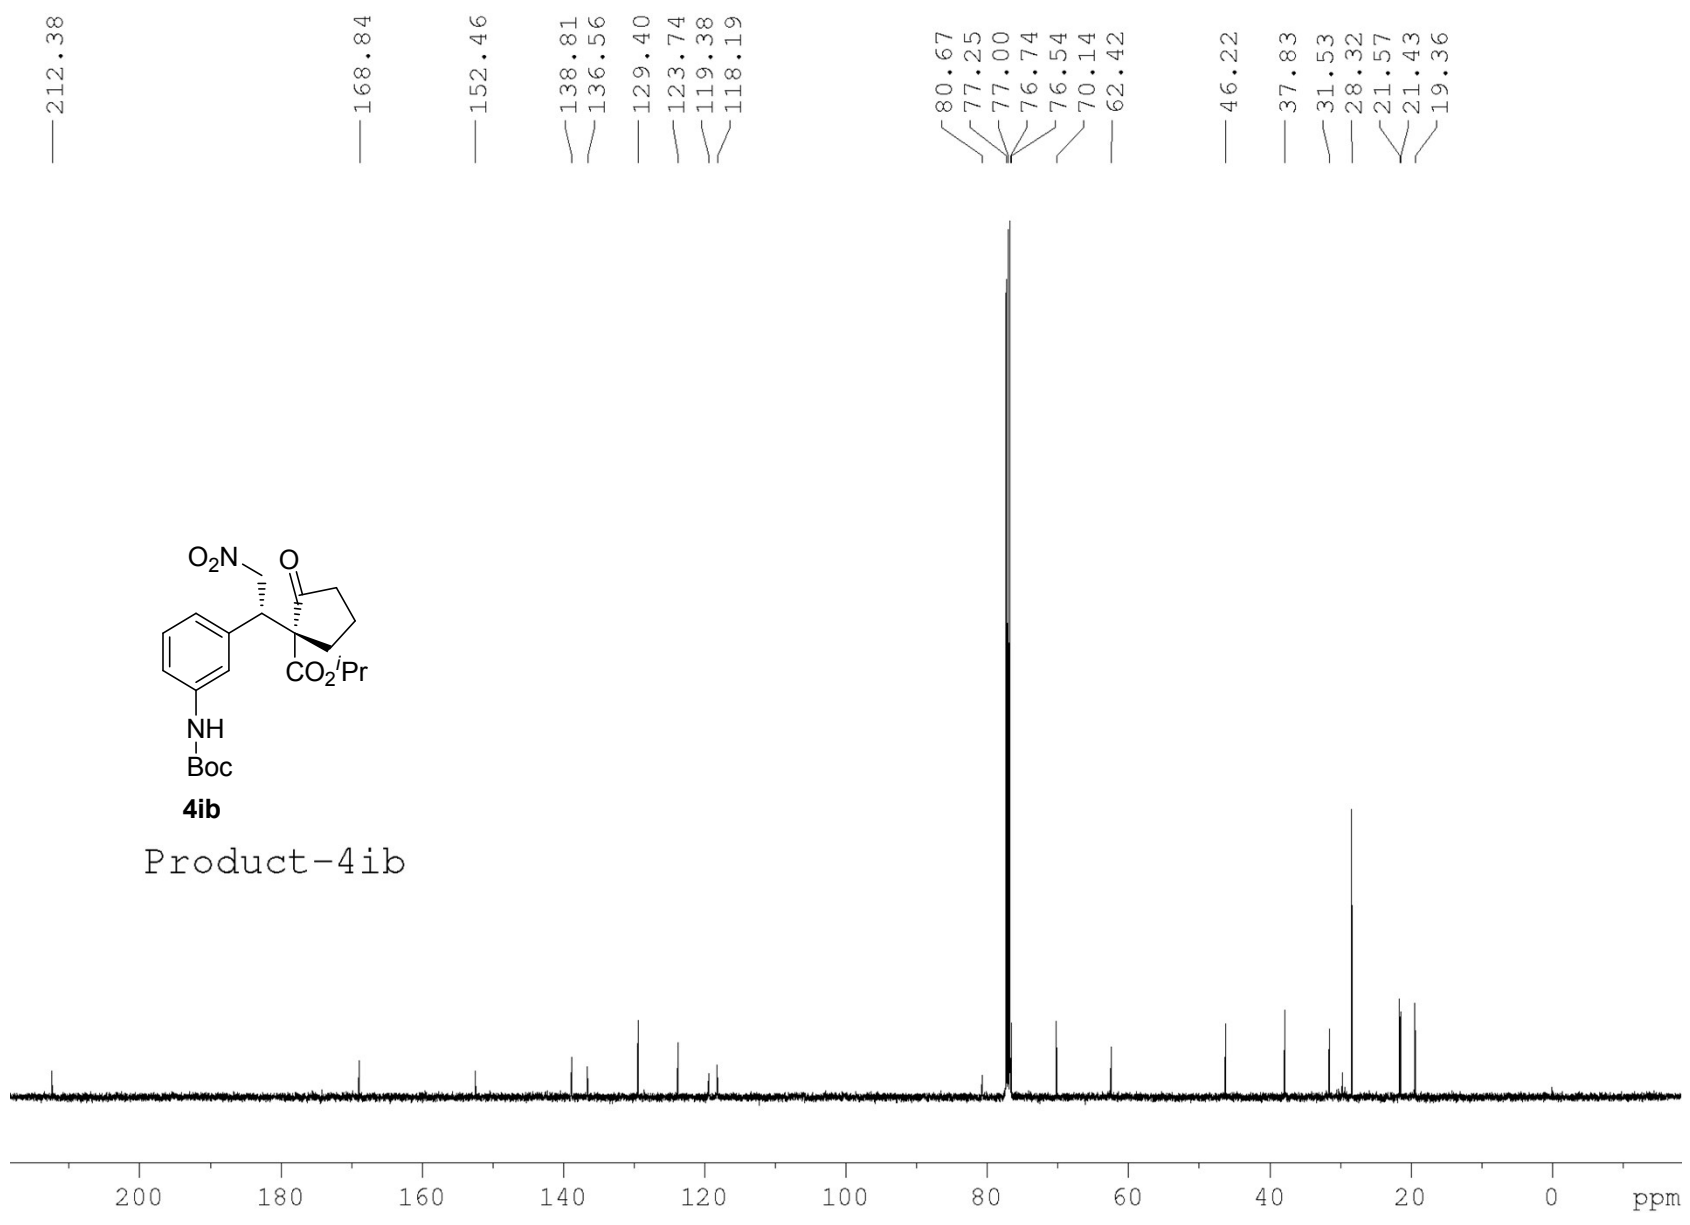

7.959  
7.943  
7.857  
7.855  
7.844  
7.841  
7.838  
7.827  
7.824  
7.662  
7.658  
7.654  
7.646  
7.643  
7.638  
7.630  
7.616  
7.614  
7.511  
7.506  
7.503  
7.494  
7.480  
7.477  
7.474  
7.470  
7.464  
7.463

4.235  
4.221  
4.206  
4.192

1.111  
1.096  
1.082

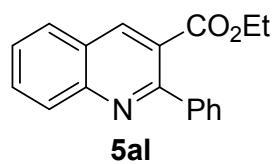

product-5a1

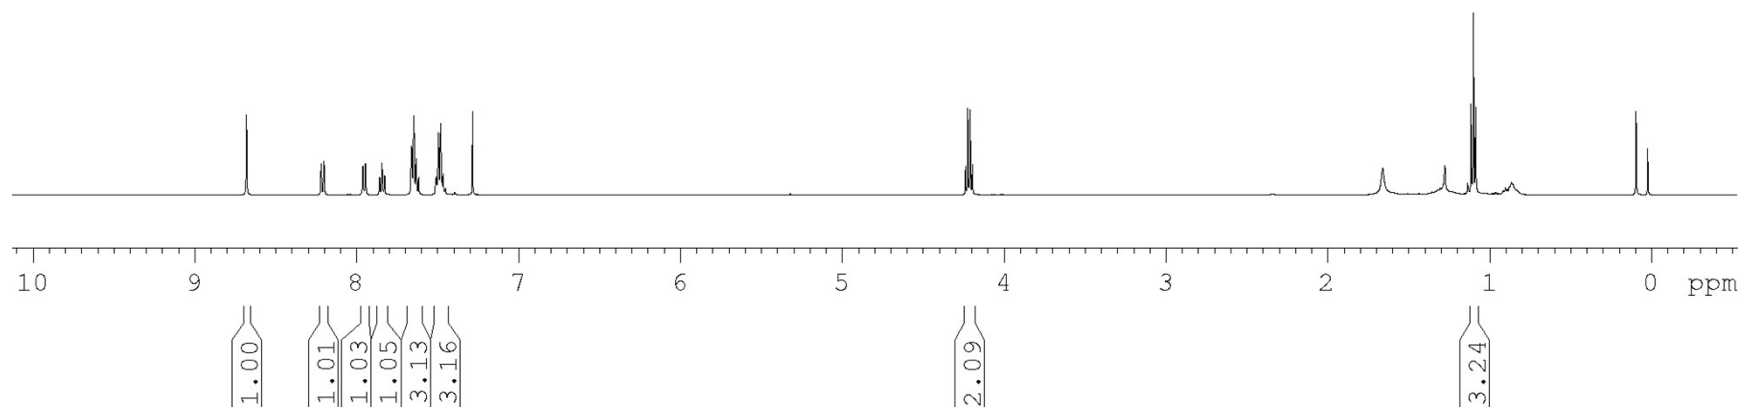



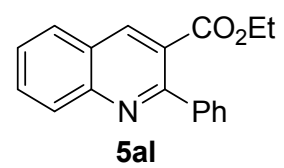

product-5al

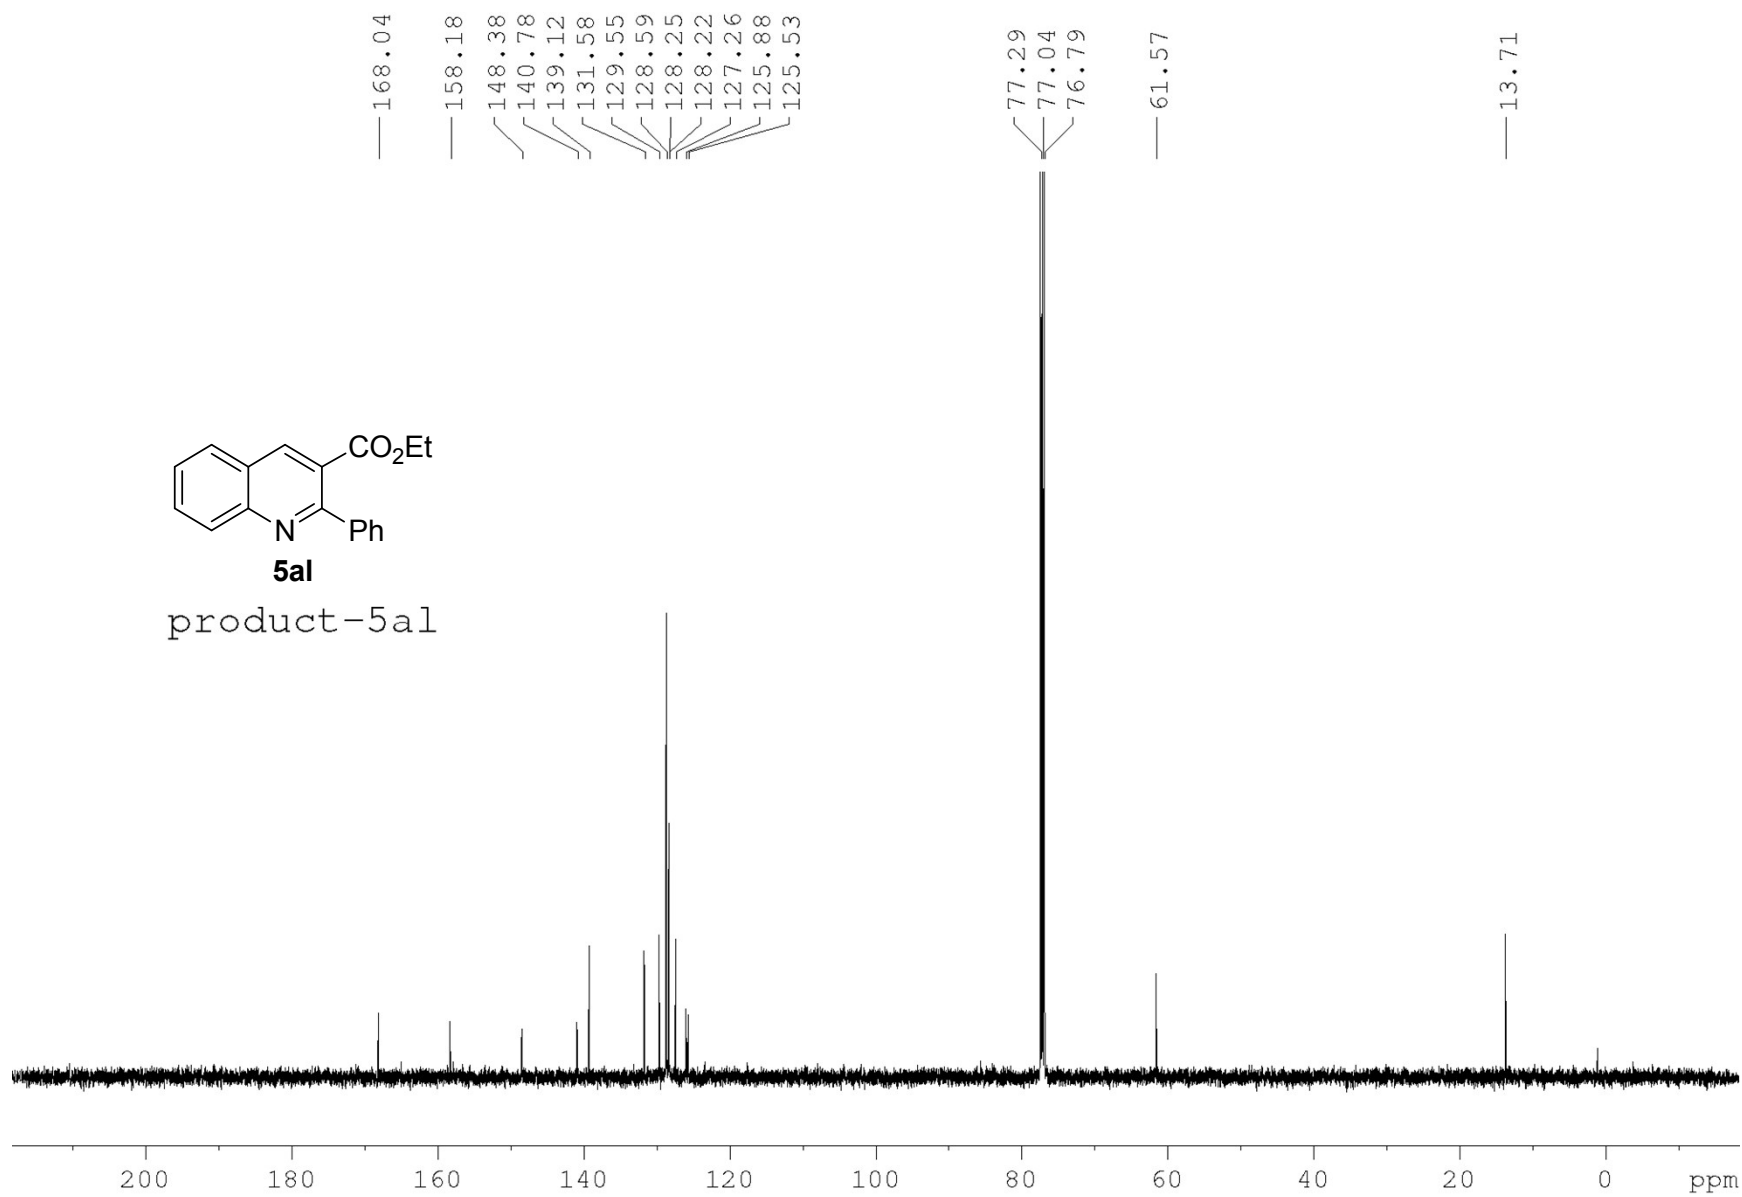

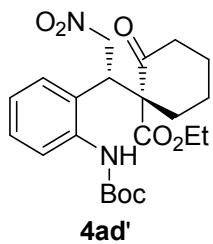

Product-4ad'

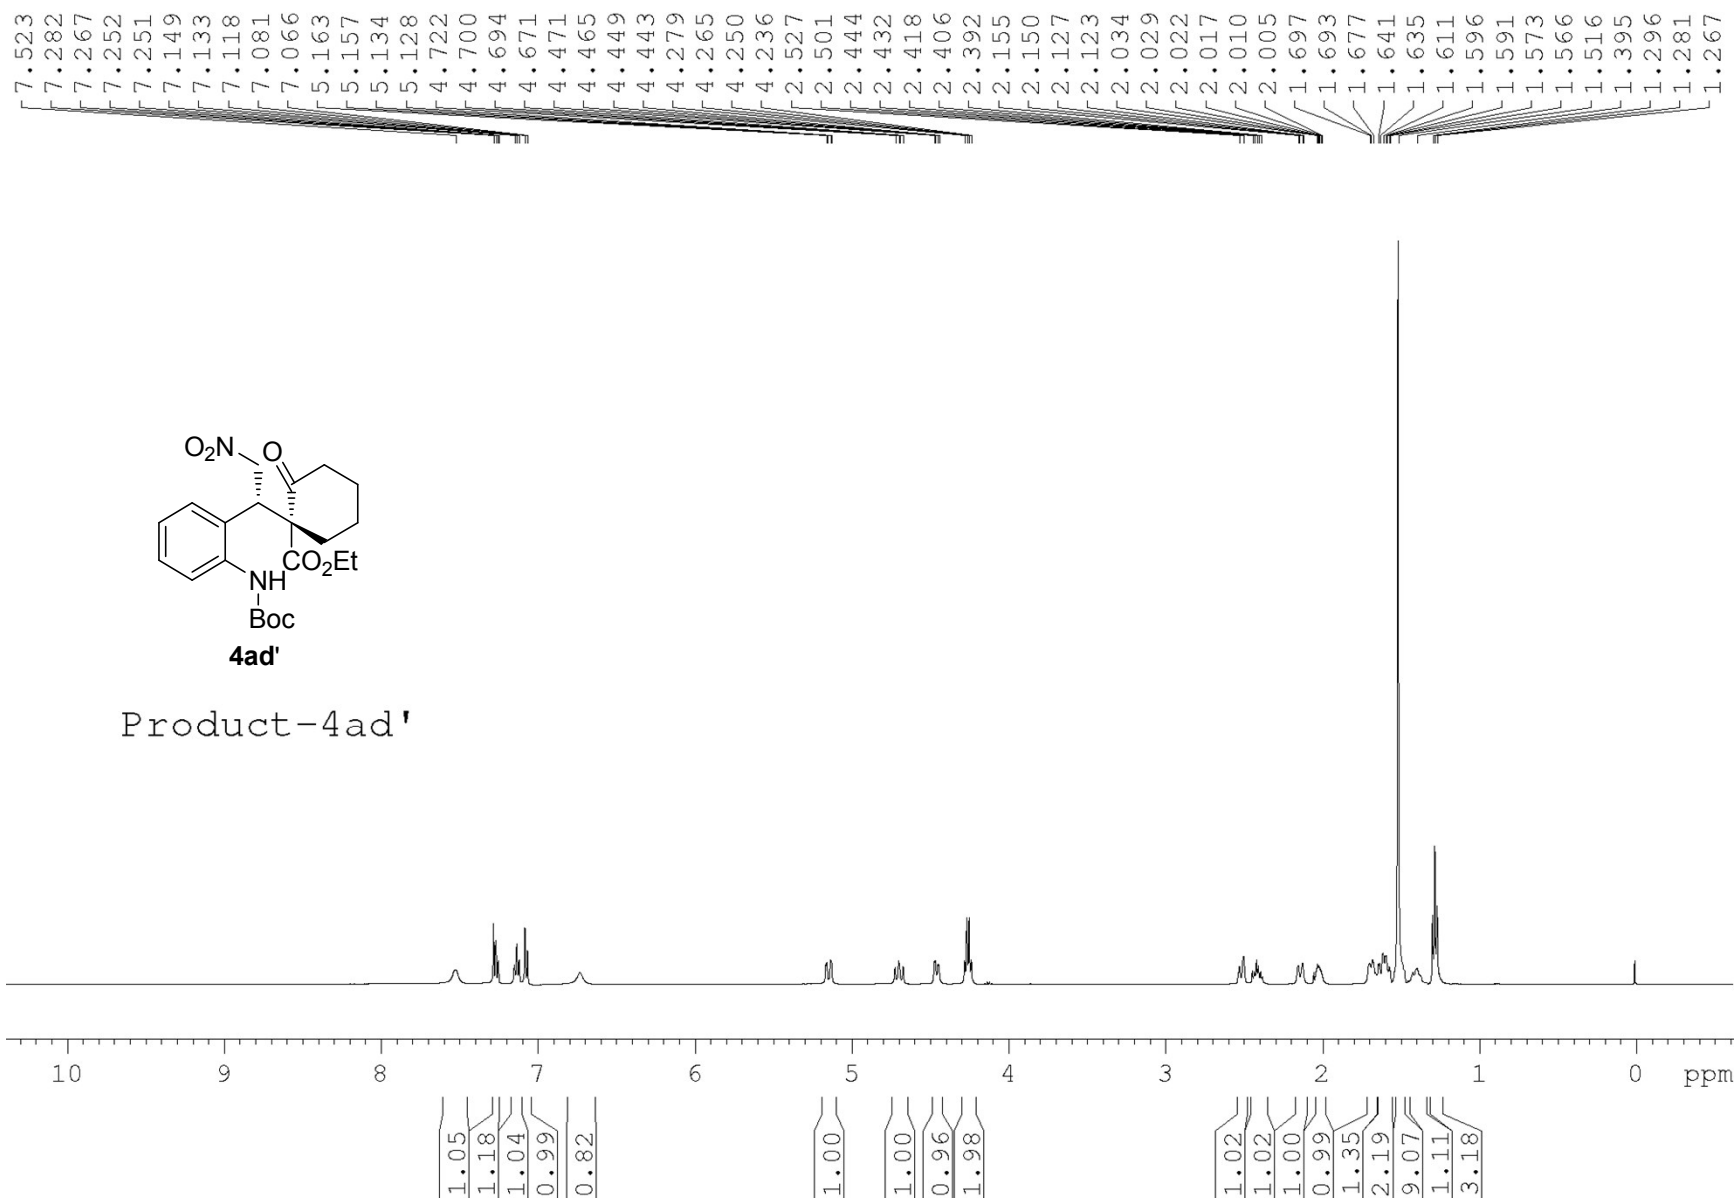

— 207.17

— 169.66

— 153.96

137.03  
129.51  
128.50  
127.45  
126.88  
125.57

80.45  
77.51  
77.31  
77.06  
76.80  
63.02  
62.20

41.44  
39.30  
35.86  
28.31  
27.90  
22.31  
— 13.96

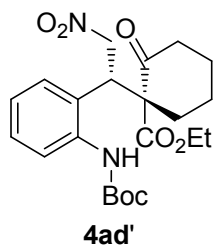

Product-4ad'

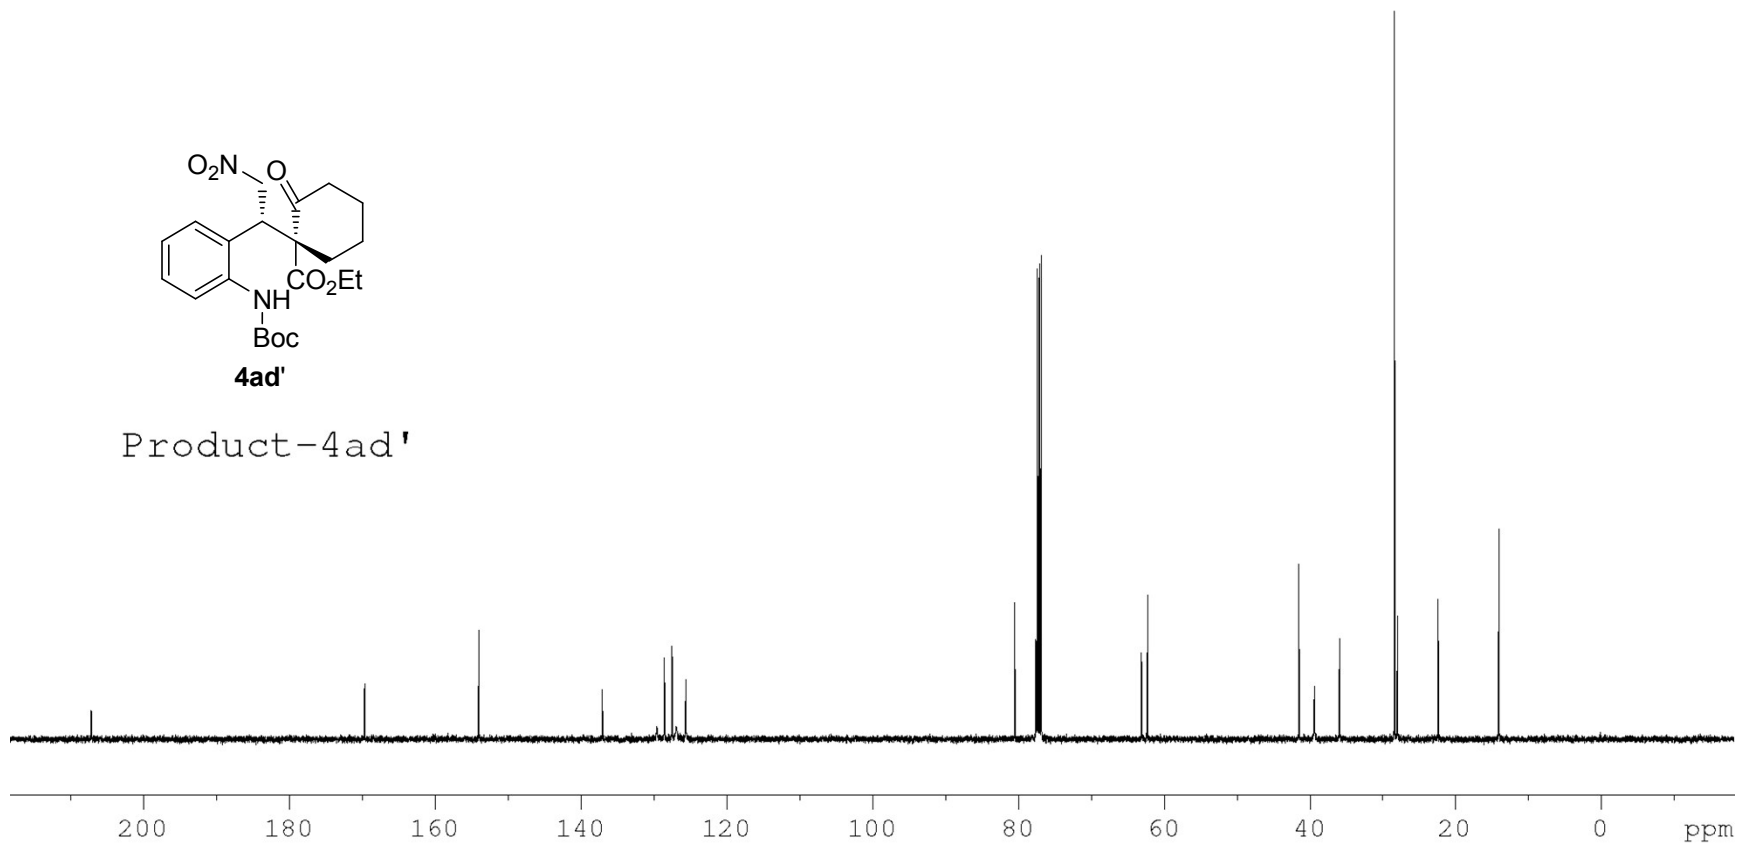

Supplement: c5ob02178b3.pdf [file c5ob02178b3.pdf]
