# Supplementary material for: Rawal's catalyst as an effective stimulant for the highly asymmetric Michael addition of β-keto esters to functionally rich nitro-olefins
Source: Royal Society of Chemistry journal article supplement (doi:10.1039/c5ob02178b), 2015-11-13
Supplement: c5ob02178b1.pdf [file c5ob02178b1.pdf]

## Supporting Information-I

### Rawal's Catalyst as an Effective Stimulant for the Highly Asymmetric Michael Addition of $\beta$ -Keto Esters to Functionally Rich Nitro-olefins

A. Suresh Kumar, T. Prabhakar Reddy, R. Madhavachary, and Dhevalapally B. Ramachary\*

Catalysis Laboratory, School of Chemistry, University of Hyderabad, Central University (P.O.),  
Hyderabad 500 046, India

E-mail: [ramsc@uohyd.ernet.in](mailto:ramsc@uohyd.ernet.in) or [ramchary.db@gmail.com](mailto:ramchary.db@gmail.com)

**General Methods:** The  $^1\text{H}$  NMR and  $^{13}\text{C}$  NMR spectra were recorded at 400 MHz and 100 MHz, respectively. The chemical shifts are reported in ppm downfield to TMS ( $\delta = 0$ ) for  $^1\text{H}$  NMR and relative to the central  $\text{CDCl}_3$  resonance ( $\delta = 77.0$ ) for  $^{13}\text{C}$  NMR. *In the  $^{13}\text{C}$  NMR spectra, the nature of the carbons (C, CH,  $\text{CH}_2$  or  $\text{CH}_3$ ) was determined by recording the DEPT-135 experiment, and is given in parentheses.* The coupling constants  $J$  are given in Hz. Column chromatography was performed using Acme's silica gel (particle size 0.063-0.200 mm). High-resolution mass spectra (HRMS) were recorded on ESI-TOF maXis. IR spectra were recorded on JASCO FT/IR-5300. Elemental analyses were recorded on a Thermo Finnigan Flash EA 1112 analyzer. Mass spectra were recorded on either VG7070H mass spectrometer using EI technique or Shimadzu-LCMS-2010 a mass spectrometer. The X-ray diffraction measurements were carried out at 298 K on an automated Enraf-Nonious MACH 3 diffractometer using graphite monochromated, Mo- $\text{K}\alpha$  ( $\lambda = 0.71073 \text{ \AA}$ ) radiation with CAD4 software or the X-ray intensity data were measured at 298 K on a Bruker SMART APEX CCD area detector system equipped with a graphite monochromator and a Mo- $\text{K}\alpha$  fine-focus sealed tube ( $\lambda = 0.71073 \text{ \AA}$ ). For thin-layer chromatography (TLC), silica gel plates Merck 60 F254 were used and compounds were visualized by irradiation with UV light and/or by treatment with a solution of *p*-anisaldehyde (23 mL), conc.  $\text{H}_2\text{SO}_4$  (35 mL), acetic acid (10 mL), and ethanol (900 mL) followed by heating.

**Materials:** All solvents and commercially available chemicals were used as received. Functionalized 2-amino- $\beta$ -nitrostyrenes **1a-j** was prepared according to the literature procedure.<sup>[1]</sup>

## General Experimental Procedures

**Procedure A: General procedure for quinidine-squaramide catalyzed asymmetric Michael reaction of (*E*)-2-(2-nitrovinyl)anilines **1** with  $\beta$ -keto esters **2**:** In an ordinary glass vial equipped with a magnetic stirring bar, to the **3d** or **3e** (5 mol%) in DCM (1.0 mL), were added (*E*)-2-(2-nitrovinyl)anilines **1a-i** (0.3 mmol) and  $\beta$ -keto esters **2a-l** (0.4 mmol, 1.33 equiv.). After stirring the reaction mixture at 25 °C as shown in Tables 1-3, the crude reaction mixture was concentrated and pure chiral products **4** were obtained by quick filtration (silica gel, mixture of hexane/ethyl acetate).

**Procedure B: General procedure for quinidine-squaramide catalyzed one-pot synthesis of 1,4-dihydroquinolines from (*E*)-2-(2-nitrovinyl)anilines **1** and  $\beta$ -keto esters **2**:** In an ordinary glass vial equipped with a magnetic stirring bar, to the **3e** (5 mol%) in DCM (1.0 mL), were added (*E*)-2-(2-nitrovinyl)anilines **1a-i** (0.3 mmol) and  $\beta$ -keto esters **2a-l** (0.4 mmol, 1.33 equiv.). The resulting mixture was stirred at 25 °C until complete consumption of (*E*)-2-(2-nitrovinyl)anilines **1a-i** and added trifluoroacetic acid (3.0 equiv.) at room temperature. After stirring at 25 °C as shown in Table 3, the reaction mixture was quenched with saturated aqueous NaHCO<sub>3</sub> and the aqueous layer was extracted with DCM (3 x 10 mL). The combined organic layer was washed with brine, dried (Na<sub>2</sub>SO<sub>4</sub>), and concentrated in vacuo. The crude product was purified using silica gel column chromatography using ethyl acetate and hexane as eluents to afford the desired 1,4-dihydroquinoline compounds **5**.

**Procedure C: General procedure for amine-catalyzed racemic Michael reaction of (*E*)-2-(2-nitrovinyl)anilines **1** with keto-esters **2**:** In an ordinary glass vial equipped with a magnetic stirring bar, to the 1:1 mixture of quinine and quinidine (each 5 mol%) in DCM (1.0 mL), were added (*E*)-2-(2-nitrovinyl)anilines **1a-i** (0.3 mmol) and  $\beta$ -keto esters **2a-l** (0.4 mmol, 1.33 equiv.). After stirring the reaction mixture at 25 °C as shown in Table S1, the crude reaction mixture was concentrated and pure racemic products **4** were obtained by quick filtration (silica gel, mixture of hexane/ethyl acetate).

**Procedure D: General procedure for amine-catalyzed one-pot synthesis of racemic 1,4-dihydroquinolines from (*E*)-2-(2-nitrovinyl)anilines **1** and keto-esters **2**:** In an ordinary glass vial equipped with a magnetic stirring bar, to the 1:1 mixture of quinine and quinidine (each 5 mol%) in DCM (1.0 mL), were added (*E*)-2-(2-nitrovinyl)anilines **1a-i** (0.3 mmol) and  $\beta$ -keto esters **2a-l** (0.4 mmol, 1.33 equiv.). The resulting mixture was stirred at 25 °C until complete consumption of (*E*)-2-(2-nitrovinyl)anilines **1a-i** was observed as determined by TLC and added trifluoroacetic acid (3.0 equiv) at room temperature. After stirring at 25 °C as shown in Table S2, the reaction mixture was quenched with

saturated aqueous NaHCO<sub>3</sub> and the aqueous layer was extracted with DCM (3 x 10 mL). The combined organic layer was washed with brine, dried (Na<sub>2</sub>SO<sub>4</sub>), and concentrated in vacuo. The crude product was purified using silica gel column chromatography using ethyl acetate and hexane as eluents to afford the desired 1,4-dihydroquinoline compounds **5**.

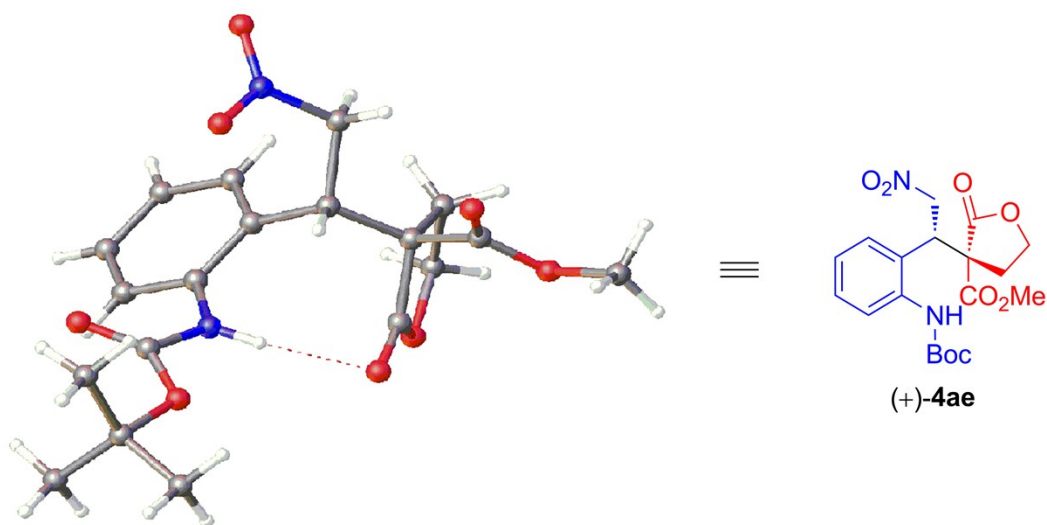

**Figure S1:** X-ray crystal structure of chiral (S)-methyl 3-((S)-1-(2-((tert-butoxycarbonyl)amino)phenyl)-2-nitroethyl)-2-oxotetrahydrofuran-3-carboxylate (**4ae**).

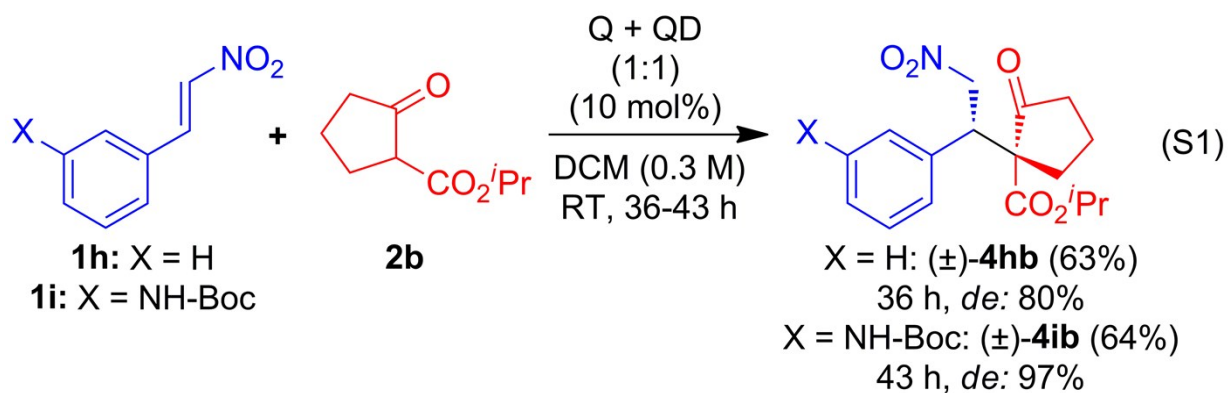

[Q = Quinine and QD = Quinidine]

**Table S1:** Synthesis of racemic Michael products

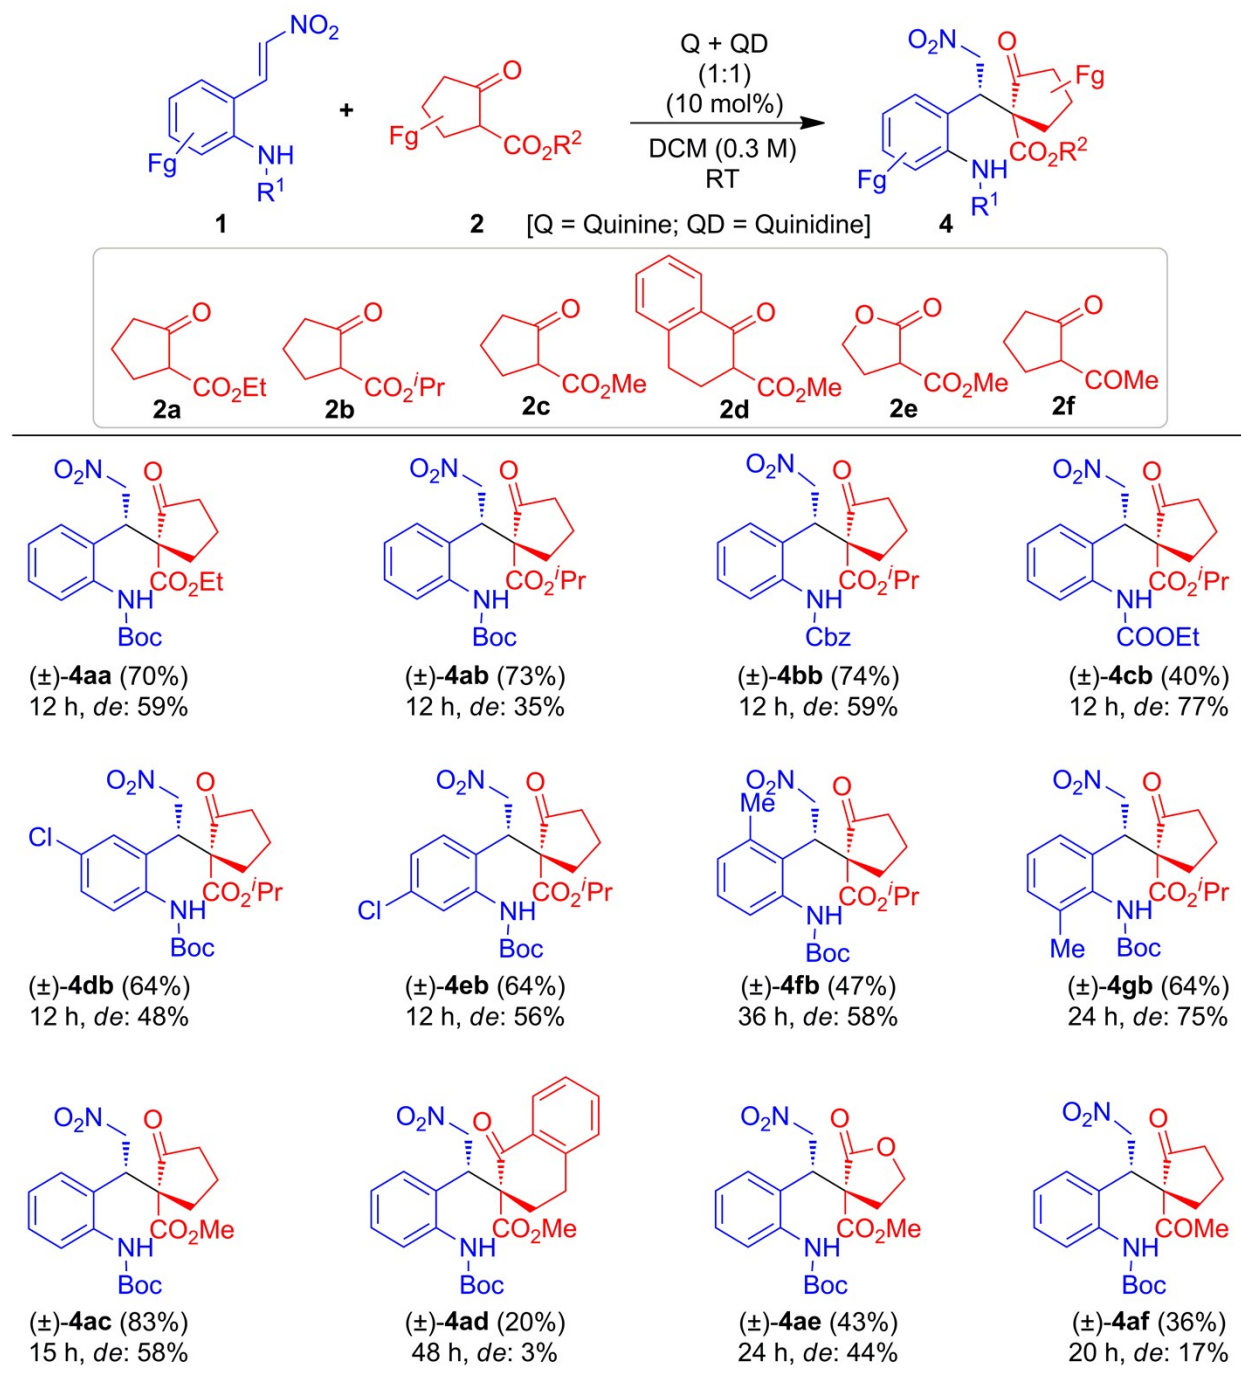

<sup>a</sup> Yield refers to the column purified product. <sup>b</sup> de was determined by CSP HPLC analysis.

**Table S2:** Synthesis of racemic 1,4-dihydroquinolines<sup>[a,b]</sup>

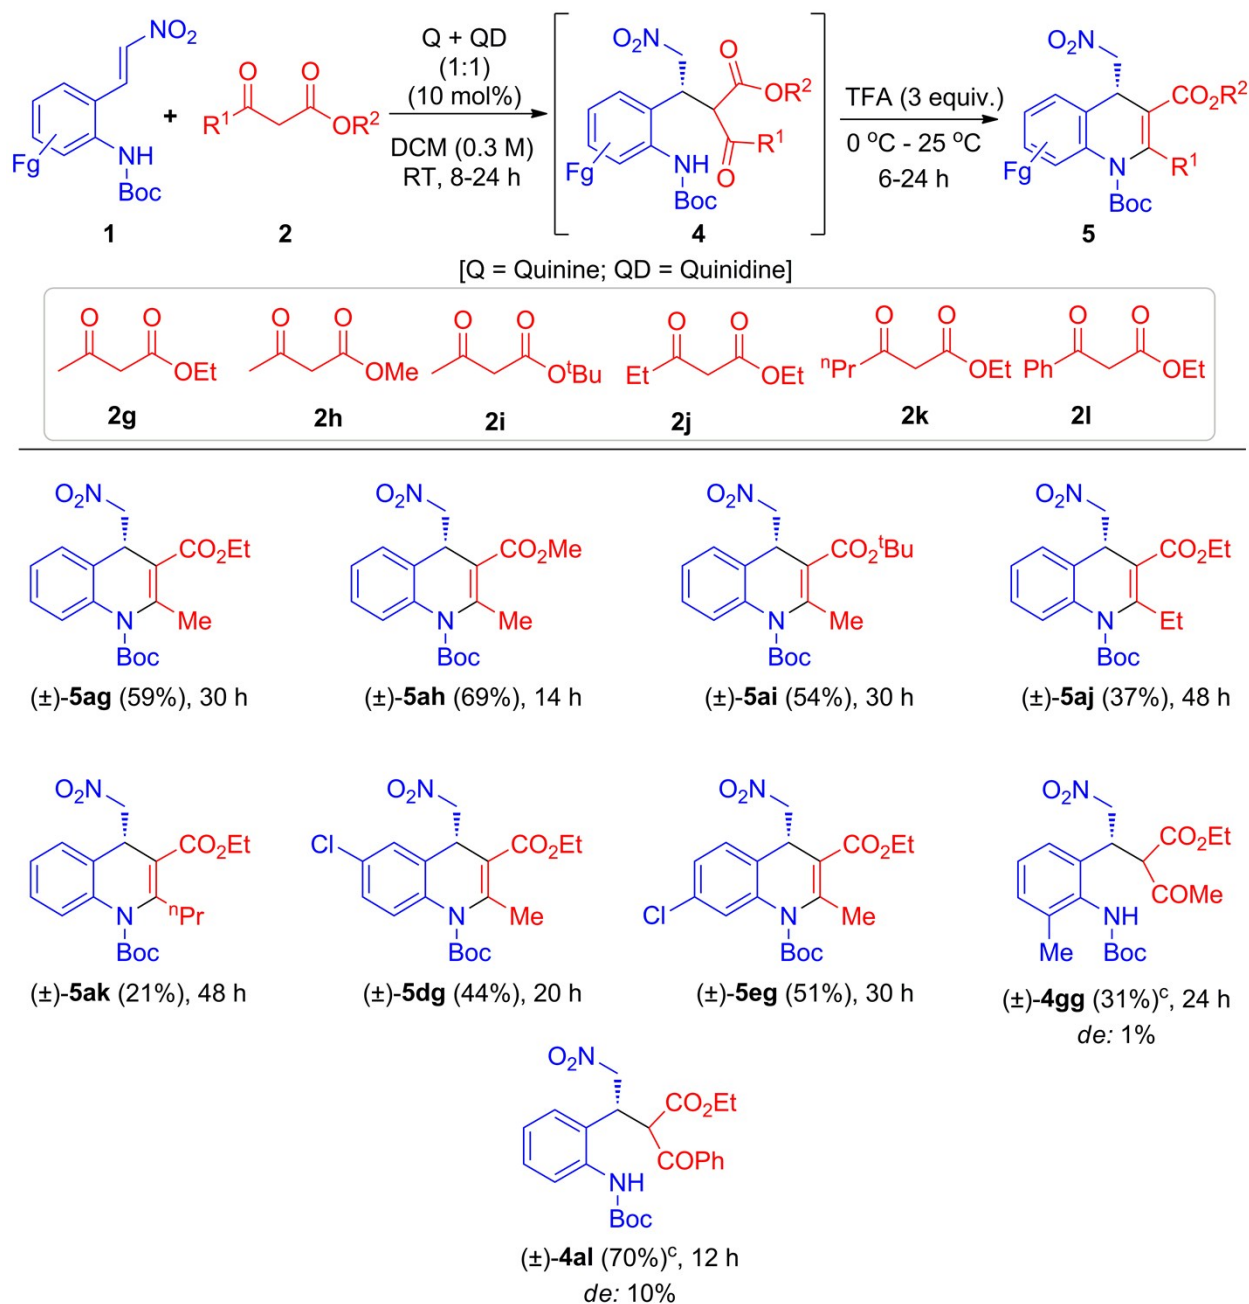

<sup>a</sup> Yield refers to the column purified product. <sup>b</sup> de were determined by CSP HPLC analysis. <sup>c</sup> Only Micheal product obtained.

**(R)-Ethyl 1-((S)-1-(2-((*tert*-butoxycarbonyl)amino)phenyl)-2-nitroethyl)-2-oxocyclopentane carboxylate (4aa):** Prepared by following the procedure A and purified by column chromatography using

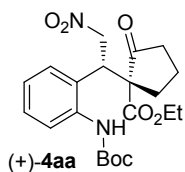

EtOAc/hexane and isolated as white solid. Mp 107-109 °C; The enantiomeric excess (*ee*) was determined by chiral stationary phase HPLC using a Lux 5u Cellulose-2 column (hexane/2-propanol = 80:20, flow rate 1.0 mL/min,  $\lambda$  = 254 nm),  $t_R$  = 9.55 min (minor),  $t_R$  = 14.92 min (major);  $[\alpha]_D^{25}$  = +3.4° ( $c$  = 0.17 g/100 mL, CHCl<sub>3</sub>, 98%

*ee* and >99% *de*); IR (KBr):  $\nu_{\max}$  3408 (N-H), 2980, 1720 (C=O), 1555 (NO<sub>2</sub>), 1450, 1367 (NO<sub>2</sub>), 1229, 1154, 1023 and 855 cm<sup>-1</sup>; <sup>1</sup>H NMR (CDCl<sub>3</sub>, 400 MHz, at 50 °C)  $\delta$  7.54 (1H, d,  $J$  = 8.0 Hz), 7.38 (1H, dd,  $J$  = 7.6, 1.2 Hz), 7.30-7.26 (1H, m), 7.18-7.12 (1H, m), 6.93 (1H, br s, NH), 5.18 (1H, dd,  $J$  = 14.4, 4.4 Hz), 4.97 (1H, dd,  $J$  = 14.4, 10.0 Hz), 4.45 (1H, dd,  $J$  = 10.4, 4.4 Hz), 4.23 (2H, q,  $J$  = 7.2 Hz, OCH<sub>2</sub>CH<sub>3</sub>), 2.44-2.36 (2H, m), 2.19-2.10 (1H, m), 2.07-1.99 (1H, m), 1.98-1.88 (2H, m), 1.55 (9H, s, OC(CH<sub>3</sub>)<sub>3</sub>), 1.29 (3H, t,  $J$  = 7.2 Hz, OCH<sub>2</sub>CH<sub>3</sub>); <sup>13</sup>C NMR (CDCl<sub>3</sub>, DEPT-135, at 50 °C)  $\delta$  213.0 (C, C=O), 169.4 (C, O-C=O), 154.0 (C, O-C=O), 137.0 (C), 130.2 (C), 128.6 (CH), 127.5 (CH), 127.2 (CH), 125.8 (CH), 80.4 (C), 77.0 (CH<sub>2</sub>), 63.0 (C), 62.3 (CH<sub>2</sub>, OCH<sub>2</sub>CH<sub>3</sub>), 38.5 (CH), 37.7 (CH<sub>2</sub>), 31.4 (CH<sub>2</sub>), 28.3 (3 x CH<sub>3</sub>, OC(CH<sub>3</sub>)<sub>3</sub>), 19.4 (CH<sub>2</sub>), 13.8 (CH<sub>3</sub>, OCH<sub>2</sub>CH<sub>3</sub>); HRMS  $m/z$  443.1795 (M + Na), calcd for C<sub>21</sub>H<sub>28</sub>N<sub>2</sub>O<sub>7</sub>Na 443.1795.

**(R)-Isopropyl 1-((S)-1-(2-((*tert*-butoxycarbonyl)amino)phenyl)-2-nitroethyl)-2-oxocyclopentane carboxylate (4ab):** Prepared by following the procedure A and purified by column chromatography using

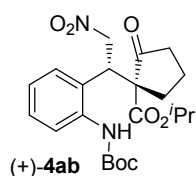

EtOAc/hexane and isolated as white solid. Mp 108-110 °C; The enantiomeric excess (*ee*) was determined by chiral stationary phase HPLC using a Daicel Chiralpak ID-H column (hexane/2-propanol = 90:10, flow rate 0.8 mL/min,  $\lambda$  = 254 nm),  $t_R$  = 14.72 min (major),  $t_R$  = 23.55 min (minor);  $[\alpha]_D^{25}$  = +12.1° ( $c$  = 0.07 g/100 mL, CHCl<sub>3</sub>,

>99% *ee* and >99% *de*); IR (KBr):  $\nu_{\max}$  3383 (N-H), 2980, 1717 (C=O), 1556 (NO<sub>2</sub>), 1451, 1368 (NO<sub>2</sub>), 1230, 1155, 1047 and 906 cm<sup>-1</sup>; <sup>1</sup>H NMR (CDCl<sub>3</sub>, 400 MHz, at 50 °C)  $\delta$  7.54 (1H, d,  $J$  = 8.0 Hz), 7.41 (1H, d,  $J$  = 7.6 Hz), 7.28 (1H, dt,  $J$  = 7.6, 1.2 Hz), 7.16 (1H, t,  $J$  = 7.6 Hz), 6.96 (1H, br s, NH), 5.15 (1H, dd,  $J$  = 14.0, 4.4 Hz), 5.08 (1H, septet,  $J$  = 6.4 Hz), 4.96 (1H, dd,  $J$  = 14.0, 10.0 Hz), 4.46 (1H, dd,  $J$  = 10.0, 4.0 Hz), 2.45-2.35 (2H, m), 2.19-2.07 (1H, m), 2.05-1.98 (1H, m), 1.96-1.90 (2H, m), 1.55 (9H, s, OC(CH<sub>3</sub>)<sub>3</sub>), 1.28 (6H, d,  $J$  = 6.0 Hz, OCH(CH<sub>3</sub>)<sub>2</sub>); <sup>13</sup>C NMR (CDCl<sub>3</sub>, DEPT-135, at 50 °C)  $\delta$  213.1 (C, C=O), 168.9 (C, O-C=O), 154.0 (C, O-C=O), 137.0 (C), 130.2 (C), 128.6 (CH), 127.5 (CH), 127.2 (CH), 125.7 (CH), 80.3 (C), 77.0 (CH<sub>2</sub>), 70.3 (CH, OCH(CH<sub>3</sub>)<sub>2</sub>), 63.1 (C), 38.5 (CH), 37.7 (CH<sub>2</sub>), 31.4 (CH<sub>2</sub>), 28.3 (3 x CH<sub>3</sub>, OC(CH<sub>3</sub>)<sub>3</sub>), 21.5 (CH<sub>3</sub>, OCH(CH<sub>3</sub>)<sub>2</sub>), 21.3 (CH<sub>3</sub>, OCH(CH<sub>3</sub>)<sub>2</sub>), 19.4 (CH<sub>2</sub>); HRMS  $m/z$  457.1951 (M + Na), calcd for C<sub>22</sub>H<sub>30</sub>N<sub>2</sub>O<sub>7</sub>Na 457.1951.



**(R)-Isopropyl 1-((S)-1-(2-(((benzyloxy)carbonyl)amino)phenyl)-2-nitroethyl)-2-oxocyclopentane**

**carboxylate (4bb):** Prepared by following the procedure A and purified by column chromatography

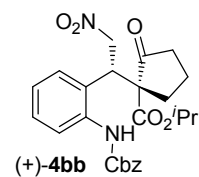

using EtOAc/hexane and isolated as solid. Mp 77-79 °C; The enantiomeric excess (*ee*) was determined by chiral stationary phase HPLC using a Daicel Chiralpak ID-H column (hexane/2-propanol = 80:20, flow rate 1.0 mL/min,  $\lambda$  = 254 nm),  $t_R$  = 17.13 min (major),  $t_R$  = 33.06 min (minor);  $[\alpha]_D^{25}$  = +18.7° (*c* = 0.14 g/100 mL, CHCl<sub>3</sub>,

>99% *ee* and >99% *de*); IR (KBr):  $\nu_{\max}$  3402 (N-H), 2987, 1719 (C=O), 1555 (NO<sub>2</sub>), 1471, 1376 (NO<sub>2</sub>), 1215, 1183, 1043, 906 and 733 cm<sup>-1</sup>; <sup>1</sup>H NMR (CDCl<sub>3</sub>, 400 MHz, at 50 °C)  $\delta$  7.59 (1H, d, *J* = 7.6 Hz), 7.46-7.44 (2H, m), 7.42-7.37 (3H, m), 7.35-7.28 (3H, m), 7.18 (1H, t, *J* = 7.6 Hz), 5.26 (2H, s, OCH<sub>2</sub>Ph), 5.12 (1H, dd, *J* = 14.0, 4.0 Hz), 5.06 (1H, septet, *J* = 6.4 Hz), 4.93 (1H, dd, *J* = 14.0, 10.4 Hz), 4.46 (1H, dd, *J* = 10.0, 4.0 Hz), 2.44-2.30 (2H, m), 2.06-1.94 (2H, m), 1.92-1.80 (2H, m), 1.25 (3H, d, *J* = 6.4 Hz, OCH(CH<sub>3</sub>)<sub>2</sub>), 1.23 (3H, d, *J* = 6.4 Hz, OCH(CH<sub>3</sub>)<sub>2</sub>); <sup>13</sup>C NMR (CDCl<sub>3</sub>, DEPT-135, at 50 °C)  $\delta$  213.2 (C, C=O), 168.8 (C, O-C=O), 154.6 (C, O-C=O), 136.7 (C), 136.5 (C), 130.0 (C), 128.8 (CH), 128.5 (2 x CH), 128.1 (2 x CH), 128.1 (CH), 127.6 (CH), 126.9 (CH), 126.0 (CH), 76.9 (CH<sub>2</sub>), 70.4 (CH, OCH(CH<sub>3</sub>)<sub>2</sub>), 67.0 (CH<sub>2</sub>, OCH<sub>2</sub>Ph), 63.2 (C), 38.5 (CH), 37.6 (CH<sub>2</sub>), 31.3 (CH<sub>2</sub>), 21.4 (CH<sub>3</sub>, OCH(CH<sub>3</sub>)<sub>2</sub>), 21.3 (CH<sub>3</sub>, OCH(CH<sub>3</sub>)<sub>2</sub>), 19.3 (CH<sub>2</sub>); HRMS *m/z* 491.1795 (M + Na), calcd for C<sub>25</sub>H<sub>28</sub>N<sub>2</sub>O<sub>7</sub>Na 491.1795.

**(R)-Isopropyl 1-((S)-1-(2-((ethoxycarbonyl)amino)phenyl)-2-nitroethyl)-2-oxocyclopentane**

**carboxylate (4cb):** Prepared by following the procedure A and purified by column chromatography using

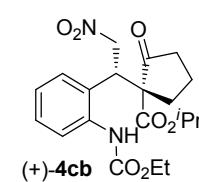

EtOAc/hexane and isolated as white solid. Mp 110-112 °C; The enantiomeric excess (*ee*) was determined by chiral stationary phase HPLC using a Daicel Chiralpak AD-H column (hexane/2-propanol = 90:10, flow rate 0.5 mL/min,  $\lambda$  = 254 nm),  $t_R$  = 17.7 min (major),  $t_R$  = 55.8 min (minor) [for minor isomer],  $t_R$  = 20.7 min (major),  $t_R$  = 27.6 min

(minor) [for major isomer];  $[\alpha]_D^{25}$  = +20.9° (*c* = 0.07 g/100 mL, CHCl<sub>3</sub>, 96% *ee* and >99% *de*); IR (KBr):  $\nu_{\max}$  3386 (N-H), 2986, 1719 (C=O), 1555 (NO<sub>2</sub>), 1470, 1376 (NO<sub>2</sub>), 1219, 1147, 1098 and 906 cm<sup>-1</sup>; <sup>1</sup>H NMR (CDCl<sub>3</sub>, 400 MHz, at 50 °C)  $\delta$  7.58 (1H, d, *J* = 8.0 Hz), 7.39 (1H, dd, *J* = 7.6, 1.2 Hz), 7.28 (1H, dt, *J* = 7.6, 1.2 Hz), 7.20 (1H, br s, NH), 7.16 (1H, dt, *J* = 7.6, 1.2 Hz), 5.10 (1H, dd, *J* = 14.0, 4.0 Hz), 5.06 (1H, septet, *J* = 6.4 Hz), 4.91 (1H, dd, *J* = 14.0, 10.0 Hz), 4.49 (1H, dd, *J* = 10.0, 4.4 Hz), 4.25 (2H, dq, *J* = 7.2, 1.6 Hz, OCH<sub>2</sub>CH<sub>3</sub>), 2.45-2.32 (2H, m), 2.10-1.99 (2H, m), 1.97-1.88 (2H, m), 1.34 (3H, t, *J* = 7.2 Hz, OCH<sub>2</sub>CH<sub>3</sub>), 1.27 (3H, d, *J* = 6.4 Hz, OCH(CH<sub>3</sub>)<sub>2</sub>), 1.25 (3H, d, *J* = 6.4 Hz, OCH(CH<sub>3</sub>)<sub>2</sub>); <sup>13</sup>C NMR (CDCl<sub>3</sub>, DEPT-135, at 50 °C)  $\delta$  213.2 (C, C=O), 168.9 (C, O-C=O), 154.8 (C, O-C=O), 136.9 (C), 129.7 (C), 128.7 (CH), 127.6 (CH), 126.7 (CH), 125.7 (CH), 76.9 (CH<sub>2</sub>), 70.4 (CH, OCH(CH<sub>3</sub>)<sub>2</sub>), 63.2 (C), 61.3 (CH<sub>2</sub>, OCH<sub>2</sub>CH<sub>3</sub>), 38.4 (CH), 37.6 (CH<sub>2</sub>), 31.1 (CH<sub>2</sub>), 21.4 (CH<sub>3</sub>,

OCH(CH<sub>3</sub>)<sub>2</sub>), 21.3 (CH<sub>3</sub>, OCH(CH<sub>3</sub>)<sub>2</sub>), 19.4 (CH<sub>2</sub>), 14.5 (CH<sub>3</sub>, OCH<sub>2</sub>CH<sub>3</sub>); HRMS m/z 429.1633 (M + Na), calcd for C<sub>20</sub>H<sub>26</sub>N<sub>2</sub>O<sub>7</sub>Na 429.1638.

**(R)-Isopropyl 1-((S)-1-(2-((tert-butoxycarbonyl)amino)-5-chlorophenyl)-2-nitroethyl)-2-oxo**

**cyclopentanecarboxylate (4db):** Prepared by following the procedure **A** and purified by column

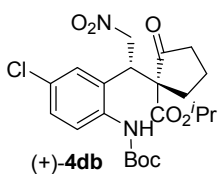

chromatography using EtOAc/hexane and isolated as white solid. Mp 78-80 °C; The enantiomeric excess (*ee*) was determined by chiral stationary phase HPLC using a Daicel Chiralpak AD-H column (hexane/2-propanol = 90:10, flow rate 0.5 mL/min,  $\lambda$  = 254 nm),  $t_R$  = 16.3 min (minor),  $t_R$  = 21.4 min (major) [for minor isomer],  $t_R$  =

18.9 min (major),  $t_R$  = 38.3 min (minor) [for major isomer];  $[\alpha]_D^{25}$  = +2.6° (*c* = 0.27 g/100 mL, CHCl<sub>3</sub>, >99% *ee* and 97% *de*); IR (KBr):  $\nu_{\max}$  3381 (N-H), 2980, 1716 (C=O), 1556 (NO<sub>2</sub>), 1456, 1368 (NO<sub>2</sub>), 1231, 1155, 1098 and 906 cm<sup>-1</sup>; <sup>1</sup>H NMR (CDCl<sub>3</sub>, 400 MHz, at 50 °C)  $\delta$  7.50 (1H, d, *J* = 8.4 Hz), 7.44 (1H, d, *J* = 2.0 Hz), 7.25 (1H, dd, *J* = 8.4, 2.4 Hz), 6.89 (1H, br s, NH), 5.17 (1H, dd, *J* = 14.4, 4.0 Hz), 5.09 (1H, septet, *J* = 6.4 Hz), 4.93 (1H, dd, *J* = 14.4, 10.4 Hz), 4.36 (1H, dd, *J* = 10.4, 4.0 Hz), 2.45-2.38 (2H, m), 2.23-2.14 (1H, m), 1.98-1.92 (3H, m), 1.54 (9H, s, OC(CH<sub>3</sub>)<sub>3</sub>), 1.29 (3H, d, *J* = 6.4 Hz, OCH(CH<sub>3</sub>)<sub>2</sub>), 1.27 (3H, d, *J* = 6.4 Hz, OCH(CH<sub>3</sub>)<sub>2</sub>); <sup>13</sup>C NMR (CDCl<sub>3</sub>, DEPT-135, at 50 °C)  $\delta$  212.8 (C, C=O), 168.7 (C, O-C=O), 153.7 (C, O-C=O), 135.8 (C), 132.2 (C), 131.2 (C), 128.8 (CH), 128.3 (CH), 127.7 (CH), 80.7 (C), 76.8 (CH<sub>2</sub>), 70.6 (CH, OCH(CH<sub>3</sub>)<sub>2</sub>), 62.9 (C), 38.5 (CH), 37.6 (CH<sub>2</sub>), 31.7 (CH<sub>2</sub>), 28.3 (3 x CH<sub>3</sub>, OC(CH<sub>3</sub>)<sub>3</sub>), 21.5 (CH<sub>3</sub>, OCH(CH<sub>3</sub>)<sub>2</sub>), 21.3 (CH<sub>3</sub>, OCH(CH<sub>3</sub>)<sub>2</sub>), 19.3 (CH<sub>2</sub>); HRMS m/z 491.1560 (M + Na), calcd for C<sub>22</sub>H<sub>29</sub>N<sub>2</sub>O<sub>7</sub>ClNa 491.1561.

**(R)-Isopropyl 1-((S)-1-(2-((tert-butoxycarbonyl)amino)-4-chlorophenyl)-2-nitroethyl)-2-oxo**

**cyclopentanecarboxylate (4eb):** Prepared by following the procedure **A** and purified by column

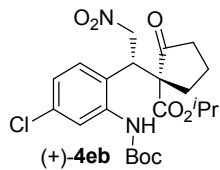

chromatography using EtOAc/hexane and isolated as white solid. Mp 102-104 °C; The enantiomeric excess (*ee*) was determined by chiral stationary phase HPLC using a Daicel Chiralcel OJ-H column (hexane/2-propanol = 90:10, flow rate 0.5 mL/min,  $\lambda$  = 254 nm),  $t_R$  = 15.1 min (minor),  $t_R$  = 54.0 min (major) [for minor isomer],  $t_R$  =

19.4 min (minor),  $t_R$  = 26.8 min (major) [for major isomer];  $[\alpha]_D^{25}$  = +6.9° (*c* = 0.18 g/100mL, CHCl<sub>3</sub>, 99% *ee* for major isomer, 85% *ee* for minor isomer and 70% *de*); IR (KBr):  $\nu_{\max}$  3376 (N-H), 2981, 1717 (C=O), 1556 (NO<sub>2</sub>), 1456, 1368 (NO<sub>2</sub>), 1230, 1154, 1098 and 938 cm<sup>-1</sup>; <sup>1</sup>H NMR (CDCl<sub>3</sub>, 400 MHz, at 50 °C)  $\delta$  7.65 (1H, br d, *J* = 2.0 Hz), 7.36 (1H, d, *J* = 8.4 Hz), 7.12 (1H, dd, *J* = 8.4, 2.0 Hz), 7.06 (1H, br s, NH), 5.11-5.05 (2H, m), 4.90 (1H, dd, *J* = 14.4, 10.4 Hz), 4.38 (1H, dd, *J* = 10.4, 4.0 Hz), 2.44-2.37 (2H, m), 2.17-2.07 (1H, m), 2.03-1.90 (3H, m), 1.55 (9H, s, OC(CH<sub>3</sub>)<sub>3</sub>), 1.27 (3H, d, *J* = 6.4 Hz, OCH(CH<sub>3</sub>)<sub>2</sub>), 1.26 (3H, d, *J* = 6.4 Hz, OCH(CH<sub>3</sub>)<sub>2</sub>); <sup>13</sup>C NMR (CDCl<sub>3</sub>, DEPT-135, at 50 °C)  $\delta$  213.0 (C, C=O), 168.8 (C, O-C=O), 153.4 (C, O-C=O), 138.5 (C), 134.4 (C), 128.8 (CH), 127.8 (C), 126.4 (CH),



125.5 (CH), 80.8 (C), 76.7 (CH<sub>2</sub>), 70.5 (CH, OCH(CH<sub>3</sub>)<sub>2</sub>), 63.1 (C), 38.1 (CH), 37.6 (CH<sub>2</sub>), 31.4 (CH<sub>2</sub>), 28.3 (3 x CH<sub>3</sub>, OC(CH<sub>3</sub>)<sub>3</sub>), 21.4 (CH<sub>3</sub>, OCH(CH<sub>3</sub>)<sub>2</sub>), 21.3 (CH<sub>3</sub>, OCH(CH<sub>3</sub>)<sub>2</sub>), 19.4 (CH<sub>2</sub>); HRMS m/z 491.1558 (M + Na), calcd for C<sub>22</sub>H<sub>29</sub>N<sub>2</sub>O<sub>7</sub>ClNa 491.1561.

**(R)-Isopropyl 1-((S)-1-(2-((tert-butoxycarbonyl)amino)-6-methylphenyl)-2-nitroethyl)-2-oxocyclopentanecarboxylate (4fb):**

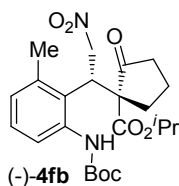

Prepared by following the procedure A and purified by column chromatography using EtOAc/hexane and isolated as oil. The enantiomeric excess (*ee*) was determined by chiral stationary phase HPLC using a Daicel Chiralpak AD-H column (hexane/2-propanol = 90:10, flow rate 0.8 mL/min,  $\lambda$  = 254 nm),  $t_R$  = 7.8 min (minor),  $t_R$  = 12.2 min (major) [for major isomer];  $t_R$  = 11.2 min (minor),  $t_R$  = 13.5 min (major) [for minor isomer];  $[\alpha]_D^{25}$  =  $-15.0^\circ$  ( $c$  = 0.12 g/100 mL, CHCl<sub>3</sub>, >99% *ee* for major, >99% *ee* for minor and *dr* = 3:1); IR (Neat):  $\nu_{\max}$  3285 (N-H), 2978, 1720 (C=O), 1556 (NO<sub>2</sub>), 1454, 1367 (NO<sub>2</sub>), 1232, 1157, 1099 and 905 cm<sup>-1</sup>; <sup>1</sup>H NMR (CDCl<sub>3</sub>, 400 MHz, at 50 °C, major isomer)  $\delta$  8.35 (1H, br s, NH), 7.54 (1H, d,  $J$  = 8.0 Hz), 7.19-7.14 (1H, m), 6.92 (1H, d,  $J$  = 7.6 Hz), 5.04-4.94 (2H, m), 4.85-4.75 (1H, m), 4.56-4.53 (1H, m), 2.66-2.62 (1H, m), 2.56-2.48 (1H, m), 2.38 (3H, s, CH<sub>3</sub>), 2.03-1.96 (1H, m), 1.88-1.78 (3H, m), 1.57 (9H, s, OC(CH<sub>3</sub>)<sub>3</sub>), 1.11 (3H, d,  $J$  = 6.4 Hz, OCH(CH<sub>3</sub>)<sub>2</sub>), 1.04 (3H, d,  $J$  = 6.4 Hz, OCH(CH<sub>3</sub>)<sub>2</sub>); <sup>13</sup>C NMR (CDCl<sub>3</sub>, DEPT-135, at 50 °C, major isomer)  $\delta$  213.8 (C, C=O), 174.2 (C, O-C=O), 169.2 (C, O-C=O), 154.0 (C), 139.0 (C), 137.5 (C), 128.4 (CH), 127.1 (CH), 124.2 (CH), 80.1 (C), 75.2 (CH<sub>2</sub>), 71.1 (CH, OCH(CH<sub>3</sub>)<sub>2</sub>), 64.3 (C), 40.3 (CH), 37.0 (CH<sub>2</sub>), 35.7 (CH<sub>2</sub>), 28.4 (3 x CH<sub>3</sub>, OC(CH<sub>3</sub>)<sub>3</sub>), 21.5 (CH<sub>3</sub>, OCH(CH<sub>3</sub>)<sub>2</sub>), 21.2 (CH<sub>3</sub>, OCH(CH<sub>3</sub>)<sub>2</sub>), 20.9 (CH<sub>3</sub>), 19.1 (CH<sub>2</sub>); HRMS m/z 471.2100 (M + Na), calcd for C<sub>23</sub>H<sub>32</sub>N<sub>2</sub>O<sub>7</sub>Na 471.2108.

**(R)-Isopropyl 1-((S)-1-(2-((tert-butoxycarbonyl)amino)-3-methylphenyl)-2-nitroethyl)-2-oxocyclopentanecarboxylate (4gb):**

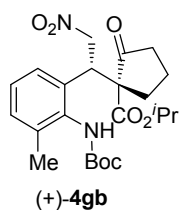

Prepared by following the procedure A and purified by column chromatography using EtOAc/hexane and isolated as oil. The enantiomeric excess (*ee*) was determined by chiral stationary phase HPLC using a Daicel Chiralpak ID-H column (hexane/2-propanol = 90:10, flow rate 1.0 mL/min,  $\lambda$  = 254 nm),  $t_R$  = 7.5 min (major),  $t_R$  = 8.7 min (minor) [for minor isomer];  $t_R$  = 10.1 min (major),  $t_R$  = 14.5 min (minor) [for major isomer];  $[\alpha]_D^{25}$  =  $+2.6^\circ$  ( $c$  = 0.52 g/100 mL, CHCl<sub>3</sub>, >99% *ee*, >99% *ee* and *dr* = 15:1); IR (Neat):  $\nu_{\max}$  3380 (N-H), 2979, 1716 (C=O), 1555 (NO<sub>2</sub>), 1488, 1375 (NO<sub>2</sub>), 1231, 1185, 1100, 907 and 777 cm<sup>-1</sup>; <sup>1</sup>H NMR (CDCl<sub>3</sub>, 400 MHz)  $\delta$  7.34-7.32 (1H, m), 7.18-7.15 (2H, m), 6.57 (1H, br s, NH), 5.23 (1H, d,  $J$  = 11.6 Hz), 5.13-4.98 (2H, m), 4.47 (1H, br s), 2.47-2.32 (2H, m), 2.29 (3H, s, CH<sub>3</sub>), 2.24-2.10 (1H, m), 2.06-1.98 (1H, m), 1.95-1.84 (2H, m), 1.54 (9H, s, OC(CH<sub>3</sub>)<sub>3</sub>), 1.28 (3H, d,  $J$  = 6.4 Hz, OCH(CH<sub>3</sub>)<sub>2</sub>), 1.27 (3H, d,  $J$  = 6.4 Hz, OCH(CH<sub>3</sub>)<sub>2</sub>); <sup>13</sup>C NMR (CDCl<sub>3</sub>, DEPT-135)  $\delta$  213.7 (C, C=O), 169.1 (C, O-C=O), 153.8 (C, O-C=O), 138.1 (C), 135.1 (C), 134.6 (C), 130.7 (CH),

127.6 (CH), 125.1 (CH), 80.1 (C), 77.6 (CH<sub>2</sub>), 70.1 (CH, OCH(CH<sub>3</sub>)<sub>2</sub>), 62.7 (C), 39.1 (CH), 37.9 (CH<sub>2</sub>), 32.0 (CH<sub>2</sub>), 28.3 (3 x CH<sub>3</sub>, OC(CH<sub>3</sub>)<sub>3</sub>), 21.6 (CH<sub>3</sub>, OCH(CH<sub>3</sub>)<sub>2</sub>), 21.5 (CH<sub>3</sub>, OCH(CH<sub>3</sub>)<sub>2</sub>), 19.5 (CH<sub>2</sub>), 18.7 (CH<sub>3</sub>); HRMS m/z 471.2103 (M + Na), calcd for C<sub>23</sub>H<sub>32</sub>N<sub>2</sub>O<sub>7</sub>Na 471.2108.

**(R)-Methyl 1-((S)-1-(2-((tert-butoxycarbonyl)amino)phenyl)-2-nitroethyl)-2-oxocyclopentane**

**carboxylate (4ac):** Prepared by following the procedure A and purified by column chromatography using

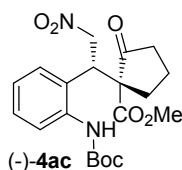

EtOAc/hexane and isolated as semisolid. The enantiomeric excess (*ee*) was determined by chiral stationary phase HPLC using a Lux 5u Cellulose-2 column (hexane/2-propanol = 80:20, flow rate 1.0 mL/min,  $\lambda$  = 254 nm),  $t_R$  = 8.19 min (minor),  $t_R$  = 10.12 min (major) [for minor isomer];  $t_R$  = 14.60 min (minor),  $t_R$  = 16.13 min (major) [for

major isomer];  $[\alpha]_D^{25} = -7.6^\circ$  ( $c$  = 0.60 g/100 mL, CHCl<sub>3</sub>, 94% *ee* for major, 46% *ee* for minor and **dr** = 39:1); IR (Neat):  $\nu_{\max}$  3393 (N-H), 2981, 1720 (C=O), 1556 (NO<sub>2</sub>), 1450, 1367 (NO<sub>2</sub>), 1230, 1154, 1048, 985 and 751 cm<sup>-1</sup>; <sup>1</sup>H NMR (CDCl<sub>3</sub>, 400 MHz, at 50 °C)  $\delta$  7.53 (1H, d,  $J$  = 8.0 Hz), 7.36 (1H, br d,  $J$  = 7.6 Hz), 7.28 (1H, dt,  $J$  = 7.6, 1.6 Hz), 7.16 (1H, br t,  $J$  = 7.6 Hz), 6.89 (1H, br s, NH), 5.20 (1H, dd,  $J$  = 14.0, 4.0 Hz), 4.98 (1H, dd,  $J$  = 14.0, 10.0 Hz), 4.42 (1H, dd,  $J$  = 10.0, 4.0 Hz), 3.78 (3H, s, CO<sub>2</sub>CH<sub>3</sub>), 2.45-2.36 (2H, m), 2.21-2.12 (1H, m), 2.07-1.98 (1H, m), 1.96-1.90 (2H, m), 1.55 (9H, s, OC(CH<sub>3</sub>)<sub>3</sub>); <sup>13</sup>C NMR (CDCl<sub>3</sub>, DEPT-135, at 50 °C)  $\delta$  212.9 (C, C=O), 170.0 (C, O-C=O), 154.0 (C, O-C=O), 137.1 (C), 130.2 (C), 128.6 (CH), 127.4 (CH), 127.3 (CH), 125.9 (CH), 80.4 (C), 76.9 (CH<sub>2</sub>), 62.9 (C), 53.0 (CH<sub>3</sub>, CO<sub>2</sub>CH<sub>3</sub>), 38.4 (CH), 37.7 (CH<sub>2</sub>), 31.5 (CH<sub>2</sub>), 28.3 (3 x CH<sub>3</sub>, OC(CH<sub>3</sub>)<sub>3</sub>), 19.3 (CH<sub>2</sub>); HRMS m/z 429.1632 (M + Na), calcd for C<sub>20</sub>H<sub>26</sub>N<sub>2</sub>O<sub>7</sub>Na 429.1638.

**(R)-Methyl 2-((S)-1-(2-((tert-butoxycarbonyl)amino)phenyl)-2-nitroethyl)-1-oxo-1,2,3,4-tetrahydro**

**naphthalene-2-carboxylate (4ad):** Prepared by following the procedure A and purified by column

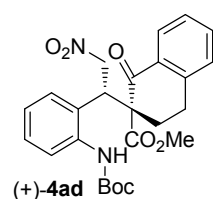

chromatography using EtOAc/hexane and isolated as oil. The enantiomeric excess (*ee*) was determined by chiral stationary phase HPLC using a Daicel Chiralpak AD-H column (hexane/2-propanol = 90:10, flow rate 0.5 mL/min,  $\lambda$  = 254 nm),  $t_R$  = 21.20 min (major),  $t_R$  = 24.11 min (minor) [for major isomer];  $t_R$  = 33.09 min (major),  $t_R$  = 38.81 min (minor) [for minor isomer];  $[\alpha]_D^{25} = +100.7^\circ$  ( $c$  = 0.33 g/100 mL, CHCl<sub>3</sub>,

94% *ee* for major, 36% *ee* for minor and **dr** = 12:1); IR (Neat):  $\nu_{\max}$  3370 (N-H), 2979, 1724 (C=O), 1555 (NO<sub>2</sub>), 1451, 1367 (NO<sub>2</sub>), 1233, 1155, 1052, 906 and 736 cm<sup>-1</sup>; <sup>1</sup>H NMR (CDCl<sub>3</sub>, 400 MHz, at 50 °C)  $\delta$  8.04 (1H, d,  $J$  = 7.6 Hz), 7.57 (1H, d,  $J$  = 8.0 Hz), 7.49-7.43 (2H, m), 7.34-7.29 (1H, m), 7.28-7.24 (1H, m), 7.20-7.14 (3H, m), 5.23 (1H, dd,  $J$  = 14.4, 4.0 Hz), 4.95 (1H, dd,  $J$  = 14.4, 10.0 Hz), 4.66 (1H, dd,  $J$  = 10.0, 4.0 Hz), 3.65 (3H, s, OCH<sub>3</sub>), 3.08-3.00 (1H, m), 2.94-2.87 (1H, m), 2.50-2.45 (1H, m), 2.19-2.10 (1H, m), 1.51 (9H, s, OC(CH<sub>3</sub>)<sub>3</sub>); <sup>13</sup>C NMR (CDCl<sub>3</sub>, DEPT-135, at 50 °C)  $\delta$  194.4 (C, C=O), 170.2 (C, O-C=O), 154.0 (C, O-C=O), 142.7 (C), 137.3 (C), 134.1 (CH), 131.6 (C), 129.8 (C), 128.6 (CH),

128.5 (CH), 128.4 (2 x CH), 126.9 (CH), 126.8 (CH), 125.4 (CH), 80.3 (C), 77.8 (CH<sub>2</sub>), 60.1 (C), 52.8 (CH<sub>3</sub>, CO<sub>2</sub>CH<sub>3</sub>), 39.3 (CH), 30.3 (CH<sub>2</sub>), 28.3 (3 x CH<sub>3</sub>, OC(CH<sub>3</sub>)<sub>3</sub>), 25.7 (CH<sub>2</sub>); HRMS m/z 491.1794 (M + Na), calcd for C<sub>25</sub>H<sub>28</sub>N<sub>2</sub>O<sub>7</sub>Na 491.1795.

**(S)-Methyl 3-((S)-1-(2-((*tert*-butoxycarbonyl)amino)phenyl)-2-nitroethyl)-2-oxotetrahydrofuran-3-carboxylate (4ae):** Prepared by following the procedure **A** and purified by column chromatography using

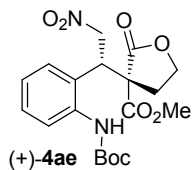

EtOAc/hexane and isolated as solid. Mp 153-155 °C; The enantiomeric excess (*ee*) was determined by chiral stationary phase HPLC using a Daicel Chiralpak ID-H column (hexane/2-propanol = 90:10, flow rate 1.0 mL/min,  $\lambda$  = 220 nm),  $t_R$  = 18.6 min (minor),  $t_R$  = 20.4 min (major) [for minor isomer],  $t_R$  = 25.6 min (major),  $t_R$  = 35.9 min (minor) [for major isomer];

$[\alpha]_D^{25} = +23.3^\circ$  ( $c = 0.17$  g/100 mL, CHCl<sub>3</sub>, >99% *ee* and >99% *de*); IR (KBr):  $\nu_{\max}$  3378 (N-H), 2983, 1763 (C=O), 1556 (NO<sub>2</sub>), 1450, 1368 (NO<sub>2</sub>), 1236, 1157, 1025 and 909 cm<sup>-1</sup>; <sup>1</sup>H NMR (CDCl<sub>3</sub>, 400 MHz, at 50 °C)  $\delta$  7.53 (1H, d,  $J$  = 8.0 Hz), 7.37-7.31 (2H, m), 7.21 (1H, t,  $J$  = 7.6 Hz), 6.85 (1H, br s, NH), 5.41 (1H, dd,  $J$  = 14.4, 4.0 Hz), 5.09 (1H, dd,  $J$  = 14.4, 10.4 Hz), 4.54 (1H, dd,  $J$  = 10.4, 4.0 Hz), 4.32-4.29 (2H, m), 3.87 (3H, s, OCH<sub>3</sub>), 2.64-2.58 (1H, m), 2.40-2.33 (1H, m), 1.55 (9H, s, OC(CH<sub>3</sub>)<sub>3</sub>); <sup>13</sup>C NMR (CDCl<sub>3</sub>, DEPT-135, at 50 °C)  $\delta$  173.3 (C, O-C=O), 168.4 (C, O-C=O), 154.2 (C, O-C=O), 137.1 (C), 130.3 (C), 129.1 (CH), 128.0 (CH), 127.0 (CH), 126.6 (CH), 80.7 (C), 76.7 (CH<sub>2</sub>), 66.5 (CH<sub>2</sub>), 56.9 (C), 53.6 (CH<sub>3</sub>, CO<sub>2</sub>CH<sub>3</sub>), 39.1 (CH), 30.9 (CH<sub>2</sub>), 28.3 (3 x CH<sub>3</sub>, OC(CH<sub>3</sub>)<sub>3</sub>); HRMS m/z 426.1877 (M + NH<sub>4</sub>), calcd for C<sub>19</sub>H<sub>28</sub>N<sub>3</sub>O<sub>8</sub> 426.1877.

***tert*-Butyl (2-((S)-1-((S)-1-acetyl-2-oxocyclopentyl)-2-nitroethyl)phenyl)carbamate (4af):** Prepared by

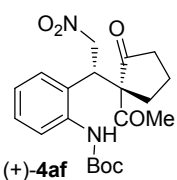

following the procedure **A** and purified by column chromatography using EtOAc/hexane and isolated as oil. The enantiomeric excess (*ee*) was determined by chiral stationary phase HPLC using a Daicel Chiralpak ID-H column (hexane/2-propanol = 90:10, flow rate 1.0 mL/min,  $\lambda$  = 254 nm),  $t_R$  = 16.85 min (major),  $t_R$  = 39.48 min (minor) [for major isomer];  $t_R$  = 18.25 min (major),  $t_R$  = 19.0 min (minor) [for minor isomer];

$[\alpha]_D^{25} = +20.0^\circ$  ( $c = 0.10$  g/100 mL, CHCl<sub>3</sub>, >99% *ee*, 94% *ee* and **dr = 8:1**); IR (Neat):  $\nu_{\max}$  3376 (N-H), 2920, 1704 (C=O), 1556 (NO<sub>2</sub>), 1453, 1367 (NO<sub>2</sub>), 1234, 1156, 1024 and 756 cm<sup>-1</sup>; <sup>1</sup>H NMR (CDCl<sub>3</sub>, 400 MHz, at 50 °C, major isomer)  $\delta$  7.54 (1H, d,  $J$  = 7.6 Hz), 7.29 (2H, m), 7.18-7.09 (2H, m), 4.83-4.77 (1H, m), 4.66-4.63 (2H, m), 2.62-2.60 (1H, m), 2.31 (3H, s, COCH<sub>3</sub>), 2.26-2.23 (1H, m), 2.18-2.11 (1H, m), 2.01-1.94 (2H, m), 1.84-1.78 (1H, m), 1.55 (9H, s, OC(CH<sub>3</sub>)<sub>3</sub>); <sup>13</sup>C NMR (CDCl<sub>3</sub>, DEPT-135, at 50 °C, major isomer)  $\delta$  215.0 (C, C=O), 202.4 (C, C=O), 154.0 (C, O-C=O), 137.2 (C), 129.3 (C), 128.8 (CH), 127.6 (CH), 127.58 (CH), 125.7 (CH), 80.4 (C), 76.5 (CH<sub>2</sub>), 71.7 (C), 38.5 (CH), 38.4 (CH<sub>2</sub>), 28.4 (CH<sub>2</sub>), 28.3 (3 x CH<sub>3</sub>, OC(CH<sub>3</sub>)<sub>3</sub>), 26.6 (CH<sub>3</sub>, COCH<sub>3</sub>), 19.5 (CH<sub>2</sub>); HRMS m/z 413.1684 (M + Na), calcd for C<sub>20</sub>H<sub>26</sub>N<sub>2</sub>O<sub>6</sub>Na 413.1689.

**(S)-1-tert-Butyl 3-ethyl 2-methyl-4-(nitromethyl)quinoline-1,3(4H)-dicarboxylate (5ag):** Prepared by

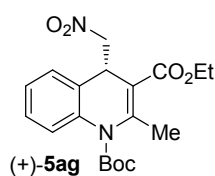

following the procedure **B** and purified by column chromatography using EtOAc/hexane and isolated as oil. The enantiomeric excess (*ee*) was determined by chiral stationary phase HPLC using a Daicel Chiralpak ID-H column (hexane/2-propanol = 90:10, flow rate 0.8 mL/min,  $\lambda$  = 254 nm),  $t_R$  = 6.80 min (minor),  $t_R$  =

7.41 min (major);  $[\alpha]_D^{25}$  = +212.1° ( $c$  = 0.17 g/100 mL, CHCl<sub>3</sub>, 98% *ee*); IR (Neat):  $\nu_{\max}$  2979, 1716 (C=O), 1587 (NO<sub>2</sub>), 1487, 1370 (NO<sub>2</sub>), 1232, 1151, 1076 and 917 cm<sup>-1</sup>; <sup>1</sup>H NMR (CDCl<sub>3</sub>, 400 MHz)  $\delta$  7.70 (1H, d,  $J$  = 8.0 Hz), 7.34-7.30 (1H, m), 7.24-7.16 (2H, m), 4.72 (1H, dd,  $J$  = 9.2, 6.0 Hz), 4.46 (1H, dd,  $J$  = 11.6, 6.0 Hz), 4.35-4.23 (2H, m, OCH<sub>2</sub>CH<sub>3</sub>), 4.20 (1H, dd,  $J$  = 11.6, 9.2 Hz), 2.54 (3H, s, CH<sub>3</sub>), 1.56 (9H, s, OC(CH<sub>3</sub>)<sub>3</sub>), 1.37 (3H, t,  $J$  = 7.2 Hz, OCH<sub>2</sub>CH<sub>3</sub>); <sup>13</sup>C NMR (CDCl<sub>3</sub>, DEPT-135)  $\delta$  165.5 (C, O-C=O), 152.7 (C), 151.5 (C, O-C=O), 138.3 (C), 129.9 (C), 127.6 (CH), 127.5 (CH), 126.0 (CH), 124.1 (CH), 117.3 (C), 83.5 (C), 77.6 (CH<sub>2</sub>), 61.1 (CH<sub>2</sub>, OCH<sub>2</sub>CH<sub>3</sub>), 38.9 (CH), 28.1 (3 x CH<sub>3</sub>, OC(CH<sub>3</sub>)<sub>3</sub>), 21.6 (CH<sub>3</sub>), 14.2 (CH<sub>3</sub>, OCH<sub>2</sub>CH<sub>3</sub>); HRMS  $m/z$  399.1529 (M + Na), calcd for C<sub>19</sub>H<sub>24</sub>N<sub>2</sub>O<sub>6</sub>Na 399.1532.

**(S)-1-tert-Butyl 3-methyl-2-methyl-4-(nitromethyl)quinoline-1,3(4H)-dicarboxylate (5ah):** Prepared

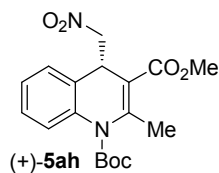

by following the procedure **B** and purified by column chromatography using EtOAc/hexane and isolated as oil. The enantiomeric excess (*ee*) was determined by chiral stationary phase HPLC using a Daicel Chiralpak AD-H column (hexane/2-propanol = 95:5, flow rate 0.5 mL/min,  $\lambda$  = 254 nm),  $t_R$  = 10.60 min (minor),  $t_R$  =

12.06 min (major);  $[\alpha]_D^{25}$  = +208.9° ( $c$  = 0.21 g/100 mL, CHCl<sub>3</sub>, 98% *ee*); IR (Neat):  $\nu_{\max}$  2930, 1720 (C=O), 1552 (NO<sub>2</sub>), 1484, 1369 (NO<sub>2</sub>), 1222, 1153, 1078 and 998 cm<sup>-1</sup>; <sup>1</sup>H NMR (CDCl<sub>3</sub>, 400 MHz)  $\delta$  7.71 (1H, d,  $J$  = 8.0 Hz), 7.35-7.33 (1H, m), 7.22-7.19 (2H, m), 4.73 (1H, dd,  $J$  = 9.2, 6.0 Hz), 4.48 (1H, dd,  $J$  = 12.0, 6.0 Hz), 4.20 (1H, dd,  $J$  = 12.0, 9.2 Hz), 3.84 (3H, s, OCH<sub>3</sub>), 2.55 (3H, s, CH<sub>3</sub>), 1.57 (9H, s, OC(CH<sub>3</sub>)<sub>3</sub>); <sup>13</sup>C NMR (CDCl<sub>3</sub>, DEPT-135)  $\delta$  165.9 (C, O-C=O), 153.2 (C), 151.5 (C, O-C=O), 138.2 (C), 129.8 (C), 127.6 (CH), 127.5 (CH), 126.0 (CH), 124.1 (CH), 116.9 (C), 83.6 (C), 77.5 (CH<sub>2</sub>), 52.0 (OCH<sub>3</sub>, COOCH<sub>3</sub>), 38.9 (CH), 28.1 (3 x CH<sub>3</sub>, OC(CH<sub>3</sub>)<sub>3</sub>), 21.7 (CH<sub>3</sub>); HRMS  $m/z$  385.1314 (M + Na), calcd for C<sub>18</sub>H<sub>22</sub>N<sub>2</sub>O<sub>6</sub>Na 385.1376.

**(S)-di-tert-Butyl 2-methyl-4-(nitromethyl)quinoline-1,3(4H)-dicarboxylate (5ai):** Prepared by

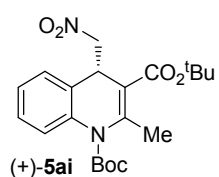

following the procedure **B** and purified by column chromatography using EtOAc/hexane and isolated as oil. The enantiomeric excess (*ee*) was determined by chiral stationary phase HPLC using a Daicel Chiralcel OD-H column (hexane/2-propanol = 95:5, flow rate 0.5 mL/min,  $\lambda$  = 254 nm),  $t_R$  = 8.28 min (minor),  $t_R$  =

10.70 min (major);  $[\alpha]_D^{25}$  = +226.9° ( $c$  = 0.32 g/100 mL, CHCl<sub>3</sub>, >99% *ee*); IR (Neat):  $\nu_{\max}$  2979, 1716 (C=O), 1552 (NO<sub>2</sub>), 1487, 1370 (NO<sub>2</sub>), 1217, 1151, 1076 and 917 cm<sup>-1</sup>; <sup>1</sup>H NMR (CDCl<sub>3</sub>, 400 MHz)  $\delta$

7.68 (1H, d,  $J = 8.0$  Hz), 7.34-7.29 (1H, m), 7.23-7.16 (2H, m), 4.65 (1H, dd,  $J = 9.2, 6.4$  Hz), 4.45 (1H, dd,  $J = 11.6, 6.4$  Hz), 4.18 (1H, dd,  $J = 11.6, 9.2$  Hz), 2.50 (3H, s,  $\text{CH}_3$ ), 1.56 (9H, s,  $\text{OC}(\text{CH}_3)_3$ ), 1.55 (9H, s,  $\text{OC}(\text{CH}_3)_3$ );  $^{13}\text{C}$  NMR ( $\text{CDCl}_3$ , DEPT-135)  $\delta$  164.8 (C,  $\text{O}-\text{C}=\text{O}$ ), 151.6 (C), 151.3 (C,  $\text{O}-\text{C}=\text{O}$ ), 138.4 (C), 130.1 (C), 127.6 (CH), 127.4 (CH), 125.9 (CH), 124.2 (CH), 118.9 (C), 83.4 (C), 81.9 (C), 77.8 ( $\text{CH}_2$ ), 39.3 (CH), 28.2 (3 x  $\text{CH}_3$ ,  $\text{OC}(\text{CH}_3)_3$ ), 28.1 (3 x  $\text{CH}_3$ ,  $\text{OC}(\text{CH}_3)_3$ ), 21.5 ( $\text{CH}_3$ ); HRMS  $m/z$  427.1844 ( $\text{M} + \text{Na}$ ), calcd for  $\text{C}_{21}\text{H}_{28}\text{N}_2\text{O}_6\text{Na}$  427.1845.

**(S)-1-*tert*-Butyl 3-ethyl-2-ethyl-4-(nitromethyl)quinoline-1,3(4H)-dicarboxylate (5aj):** Prepared by

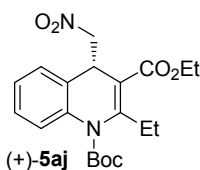

following the procedure **B** and purified by column chromatography using EtOAc/hexane and isolated as oil. The enantiomeric excess (*ee*) was determined by chiral stationary phase HPLC using a Daicel Chiralcel OD-H column (hexane/2-propanol = 95:5, flow rate 0.5 mL/min,  $\lambda = 254$  nm),  $t_R = 9.32$  min (minor),  $t_R =$

11.71 min (major);  $[\alpha]_D^{25} = +225.7^\circ$  ( $c = 0.13$  g/100 mL,  $\text{CHCl}_3$ , >99% *ee*); IR (Neat):  $\nu_{\text{max}}$  2978, 1717 ( $\text{C}=\text{O}$ ), 1553 ( $\text{NO}_2$ ), 1487, 1369 ( $\text{NO}_2$ ), 1224, 1151, 1080 and 894  $\text{cm}^{-1}$ ;  $^1\text{H}$  NMR ( $\text{CDCl}_3$ , 400 MHz)  $\delta$  7.64 (1H, d,  $J = 8.0$  Hz), 7.34-7.29 (1H, m), 7.22-7.16 (2H, m), 4.65 (1H, dd,  $J = 9.6, 6.4$  Hz), 4.52 (1H, dd,  $J = 12.0, 6.0$  Hz), 4.36-4.24 (2H, m,  $\text{OCH}_2\text{CH}_3$ ), 4.18 (1H, dd,  $J = 12.0, 9.6$  Hz), 3.34 (1H, sextet,  $J = 7.2$  Hz), 2.90 (1H, sextet,  $J = 7.6$  Hz), 1.56 (9H, s,  $\text{OC}(\text{CH}_3)_3$ ), 1.37 (3H, t,  $J = 7.2$  Hz,  $\text{OCH}_2\text{CH}_3$ ), 1.09 (3H, t,  $J = 7.6$  Hz,  $\text{CH}_2\text{CH}_3$ );  $^{13}\text{C}$  NMR ( $\text{CDCl}_3$ , DEPT-135)  $\delta$  165.5 (C,  $\text{O}-\text{C}=\text{O}$ ), 158.2 (C), 151.7 (C,  $\text{O}-\text{C}=\text{O}$ ), 139.0 (C), 130.7 (C), 127.6 (CH), 127.5 (CH), 126.0 (CH), 124.3 (CH), 118.1 (C), 83.4 (C), 77.5 ( $\text{CH}_2$ ), 61.1 ( $\text{CH}_2$ ,  $\text{OCH}_2\text{CH}_3$ ), 39.4 (CH), 28.1 (3 x  $\text{CH}_3$ ,  $\text{OC}(\text{CH}_3)_3$ ), 25.7 ( $\text{CH}_2$ ,  $\text{CH}_2\text{CH}_3$ ), 14.1 ( $\text{CH}_3$ ,  $\text{OCH}_2\text{CH}_3$ ), 12.7 ( $\text{CH}_3$ ,  $\text{CH}_2\text{CH}_3$ ); HRMS  $m/z$  413.1681 ( $\text{M} + \text{Na}$ ), calcd for  $\text{C}_{20}\text{H}_{26}\text{N}_2\text{O}_6\text{Na}$  413.1689.

**(S)-1-*tert*-Butyl 3-ethyl-4-(nitromethyl)-2-propylquinoline-1,3(4H)-dicarboxylate (5ak):** Prepared by

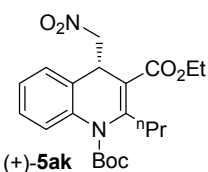

following the procedure **B** and purified by column chromatography using EtOAc/hexane and isolated as oil. The enantiomeric excess (*ee*) was determined by chiral stationary phase HPLC using a Daicel Chiralpak AD-H column (hexane/2-propanol = 97:3, flow rate 0.5 mL/min,  $\lambda = 254$  nm),  $t_R = 10.79$  min (minor),  $t_R =$

13.62 min (major);  $[\alpha]_D^{25} = +159.5^\circ$  ( $c = 0.14$  g/100 mL,  $\text{CHCl}_3$ , 97% *ee*); IR (Neat):  $\nu_{\text{max}}$  2964, 1714 ( $\text{C}=\text{O}$ ), 1553 ( $\text{NO}_2$ ), 1487, 1369 ( $\text{NO}_2$ ), 1219, 1151, 1078 and 919  $\text{cm}^{-1}$ ;  $^1\text{H}$  NMR ( $\text{CDCl}_3$ , 400 MHz)  $\delta$  7.63 (1H, d,  $J = 8.0$  Hz), 7.33-7.28 (1H, m), 7.22-7.16 (2H, m), 4.66 (1H, dd,  $J = 9.6, 6.0$  Hz), 4.52 (1H, dd,  $J = 12.0, 6.0$  Hz), 4.35-4.24 (2H, m,  $\text{OCH}_2\text{CH}_3$ ), 4.18 (1H, dd,  $J = 12.0, 9.6$  Hz), 3.38-3.30 (1H, m), 2.89-2.82 (1H, m), 1.55 (9H, s,  $\text{OC}(\text{CH}_3)_3$ ), 1.37 (3H, t,  $J = 6.8$  Hz,  $\text{OCH}_2\text{CH}_3$ ), 0.89-0.85 (5H, m,  $\text{CH}_2\text{CH}_3$ );  $^{13}\text{C}$  NMR ( $\text{CDCl}_3$ , DEPT-135)  $\delta$  165.5 (C,  $\text{O}-\text{C}=\text{O}$ ), 157.1 (C), 151.7 (C,  $\text{O}-\text{C}=\text{O}$ ), 138.8 (C), 130.7 (C), 127.6 (CH), 127.5 (CH), 126.0 (CH), 124.4 (CH), 118.7 (C), 83.4 (C), 77.5 ( $\text{CH}_2$ ), 61.1 ( $\text{CH}_2$ ,

OCH<sub>2</sub>CH<sub>3</sub>), 39.4 (CH), 34.0 (CH<sub>2</sub>), 28.1 (3 x CH<sub>3</sub>, OC(CH<sub>3</sub>)<sub>3</sub>), 21.9 (CH<sub>2</sub>), 14.2 (CH<sub>3</sub>, OCH<sub>2</sub>CH<sub>3</sub>), 13.9 (CH<sub>3</sub>, CH<sub>2</sub>CH<sub>2</sub>CH<sub>3</sub>); HRMS m/z 427.1842 (M + Na), calcd for C<sub>21</sub>H<sub>28</sub>N<sub>2</sub>O<sub>6</sub>Na 427.1845.

**(S)-1-tert-Butyl 3-ethyl-6-chloro-2-methyl-4-(nitromethyl)quinoline-1,3(4H)-dicarboxylate (5dg):**

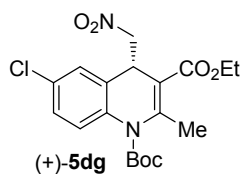

Prepared by following the procedure **B** and purified by column chromatography using EtOAc/hexane and isolated as oil. The enantiomeric excess (*ee*) was determined by chiral stationary phase HPLC using a Daicel Chiralpak AD-H column (hexane/2-propanol = 95:5, flow rate 0.5 mL/min,  $\lambda$  = 254 nm),  $t_R$  = 9.66

min (minor),  $t_R$  = 11.31 min (major);  $[\alpha]_D^{25}$  = +199.2° (*c* = 0.18 g/100 mL, CHCl<sub>3</sub>, 99% *ee*); IR (Neat):  $\nu_{\max}$  2980, 1717 (C=O), 1552 (NO<sub>2</sub>), 1483, 1370 (NO<sub>2</sub>), 1232, 1152, 1093 and 987 cm<sup>-1</sup>; <sup>1</sup>H NMR (CDCl<sub>3</sub>, 400 MHz)  $\delta$  7.64 (1H, d, *J* = 8.8 Hz), 7.28 (1H, dd, *J* = 8.8, 2.4 Hz), 7.22 (1H, d, *J* = 2.0 Hz), 4.67 (1H, dd, *J* = 9.2, 5.6 Hz), 4.45 (1H, dd, *J* = 12.0, 5.6 Hz), 4.35-4.23 (2H, m, OCH<sub>2</sub>CH<sub>3</sub>), 4.19 (1H, dd, *J* = 12.0, 9.2 Hz), 2.53 (3H, s, CH<sub>3</sub>), 1.56 (9H, s, OC(CH<sub>3</sub>)<sub>3</sub>), 1.36 (3H, t, *J* = 7.2 Hz, OCH<sub>2</sub>CH<sub>3</sub>); <sup>13</sup>C NMR (CDCl<sub>3</sub>, DEPT-135)  $\delta$  165.2 (C, O-C=O), 152.7 (C), 151.2 (C, O-C=O), 136.9 (C), 131.6 (C), 131.4 (C), 127.6 (CH), 127.4 (CH), 125.4 (CH), 116.8 (C), 83.9 (C), 77.2 (CH<sub>2</sub>), 61.2 (CH<sub>2</sub>, OCH<sub>2</sub>CH<sub>3</sub>), 38.6 (CH), 28.1 (3 x CH<sub>3</sub>, OC(CH<sub>3</sub>)<sub>3</sub>), 21.5 (CH<sub>3</sub>), 14.2 (CH<sub>3</sub>, OCH<sub>2</sub>CH<sub>3</sub>); HRMS m/z 433.1141 (M + Na), calcd for C<sub>19</sub>H<sub>23</sub>N<sub>2</sub>O<sub>6</sub>ClNa 433.1143.

**(S)-1-tert-Butyl 3-ethyl-7-chloro-2-methyl-4-(nitromethyl)quinoline-1,3(4H)-dicarboxylate (5eg):**

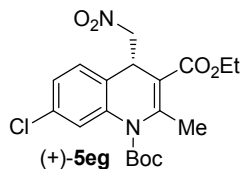

Prepared by following the procedure **B** and purified by column chromatography using EtOAc/hexane and isolated as oil. The enantiomeric excess (*ee*) was determined by chiral stationary phase HPLC using a Daicel Chiralpak AD-H column (hexane/2-propanol = 95:5, flow rate 0.5 mL/min,  $\lambda$  = 254 nm),  $t_R$  = 9.06

min (minor),  $t_R$  = 10.27 min (major);  $[\alpha]_D^{25}$  = +229.8° (*c* = 0.18 g/100 mL, CHCl<sub>3</sub>, 98% *ee*); IR (Neat):  $\nu_{\max}$  2980, 1717 (C=O), 1553 (NO<sub>2</sub>), 1484, 1370 (NO<sub>2</sub>), 1238, 1151, 1094 and 921 cm<sup>-1</sup>; <sup>1</sup>H NMR (CDCl<sub>3</sub>, 500 MHz)  $\delta$  7.76 (1H, d, *J* = 2.0 Hz), 7.19-7.13 (2H, m), 4.69 (1H, dd, *J* = 9.5, 6.0 Hz), 4.47 (1H, dd, *J* = 12.0, 5.5 Hz), 4.35-4.25 (2H, m, OCH<sub>2</sub>CH<sub>3</sub>), 4.16 (1H, dd, *J* = 12.0, 9.5 Hz), 2.53 (3H, s, CH<sub>3</sub>), 1.58 (9H, s, OC(CH<sub>3</sub>)<sub>3</sub>), 1.37 (3H, t, *J* = 7.0 Hz, OCH<sub>2</sub>CH<sub>3</sub>); <sup>13</sup>C NMR (CDCl<sub>3</sub>, DEPT-135)  $\delta$  165.3 (C, O-C=O), 152.4 (C), 151.1 (C, O-C=O), 139.1 (C), 133.4 (C), 128.5 (CH), 128.1 (C), 126.1 (CH), 124.4 (CH), 117.0 (C), 84.1 (C), 77.4 (CH<sub>2</sub>), 61.2 (CH<sub>2</sub>, OCH<sub>2</sub>CH<sub>3</sub>), 38.4 (CH), 28.1 (3 x CH<sub>3</sub>, OC(CH<sub>3</sub>)<sub>3</sub>), 21.6 (CH<sub>3</sub>), 14.2 (CH<sub>3</sub>, OCH<sub>2</sub>CH<sub>3</sub>); HRMS m/z 433.1136 (M + Na), calcd for C<sub>19</sub>H<sub>23</sub>N<sub>2</sub>O<sub>6</sub>ClNa 433.1143.



**(3R)-Ethyl 2-acetyl-3-(2-((*tert*-butoxycarbonyl)amino)-3-methylphenyl)-4-nitrobutanoate (4gg):**

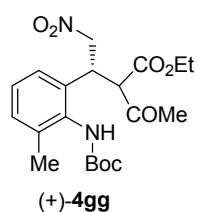

Prepared by following the procedure A and purified by column chromatography using EtOAc/hexane and isolated as oil. The enantiomeric excess (*ee*) was determined by chiral stationary phase HPLC using a Daicel Chiralpak AD-H column (hexane/2-propanol = 95:5, flow rate 0.5 mL/min,  $\lambda$  = 220 nm),  $t_R$  = 20.55 min (major),  $t_R$  = 27.96 min (minor);  $t_R$  = 34.92 min (minor),  $t_R$  = 40.41 min (major);  $[\alpha]_D^{25}$  = +4.3° ( $c$  =

0.19 g/100 mL, CHCl<sub>3</sub>, 99% *ee*, 94% *ee* and *dr* = 1:1); IR (Neat):  $\nu_{\max}$  3392 (N-H), 2981, 1710 (C=O), 1555 (NO<sub>2</sub>), 1489, 1367 (NO<sub>2</sub>), 1244, 1159, 1052, 955 and 836 cm<sup>-1</sup>; <sup>1</sup>H NMR (CDCl<sub>3</sub>, 400 MHz, at 50 °C, *dr* = 1.5:1.0)  $\delta$  7.18-7.12 (3H, m), 7.06-7.00 (3H, m), 6.22 (2H, br s, NH), 4.91-4.87 (3H, m), 4.67-4.60 (2H, m), 4.25 (4H, q,  $J$  = 7.2 Hz, OCH<sub>2</sub>CH<sub>3</sub>), 4.17 (1H, br d,  $J$  = 7.6 Hz), 4.05 (2H, br q,  $J$  = 7.2 Hz), 2.29 (6H, br s, 2 x CH<sub>3</sub>), 2.13 (6H, br s, 2 x CH<sub>3</sub>), 1.52 (18H, s, 2 x OC(CH<sub>3</sub>)<sub>3</sub>), 1.30 (3H, t,  $J$  = 7.2 Hz, OCH<sub>2</sub>CH<sub>3</sub>), 1.10 (3H, t,  $J$  = 7.2 Hz, OCH<sub>2</sub>CH<sub>3</sub>); <sup>13</sup>C NMR (CDCl<sub>3</sub>, DEPT-135, at 50 °C, *dr* = 1.5:1.0)  $\delta$  200.74 (C, C=O), 200.67 (C, C=O), 167.8 (C, O-C=O), 167.5 (C, O-C=O), 154.4 (2 x C, O-C=O), 137.96 (C), 137.90 (C), 134.2 (2 x C), 131.9 (C), 131.78 (C), 130.41 (CH), 130.37 (CH), 127.65 (CH), 127.62 (CH), 124.3 (2 x CH), 80.4 (2 x C), 77.1 (CH<sub>2</sub>), 76.95 (CH<sub>2</sub>), 61.9 (2 x CH), 61.86 (2 x CH<sub>2</sub>, OCH<sub>2</sub>CH<sub>3</sub>), 36.3 (2 x CH), 29.6 (2 x CH<sub>3</sub>), 28.2 (6 x CH<sub>3</sub>, 2 x OC(CH<sub>3</sub>)<sub>3</sub>), 18.46 (CH<sub>3</sub>), 18.42 (CH<sub>3</sub>), 13.89 (CH<sub>3</sub>, OCH<sub>2</sub>CH<sub>3</sub>), 13.68 (CH<sub>3</sub>, OCH<sub>2</sub>CH<sub>3</sub>); HRMS  $m/z$  431.1797 (M + Na), calcd for C<sub>20</sub>H<sub>28</sub>N<sub>2</sub>O<sub>7</sub>Na 431.1795.

**(3R)-Ethyl 2-benzoyl-3-(2-((*tert*-butoxycarbonyl)amino)phenyl)-4-nitrobutanoate (4al):**

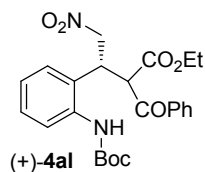

Prepared by following the procedure A and purified by column chromatography using EtOAc/hexane and isolated as oil. The enantiomeric excess (*ee*) was determined by chiral stationary phase HPLC using a Daicel Chiralpak AD-H column (hexane/2-propanol = 95:5, flow rate 0.5 mL/min,  $\lambda$  = 254 nm),  $t_R$  = 31.90 min (major),  $t_R$  = 41.18 min (minor) [for major isomer];  $t_R$  = 45.22 min (major),  $t_R$  = 51.52 min (minor) [for minor isomer];

$[\alpha]_D^{25}$  = +69.2° [ $c$  = 0.37 g/100 mL, CHCl<sub>3</sub>, 90% *ee*, 91% *ee* and *dr* = 3.7:1]; IR (Neat):  $\nu_{\max}$  3412 (N-H), 2980, 1726 (C=O), 1554 (NO<sub>2</sub>), 1473, 1367 (NO<sub>2</sub>), 1230, 1154, 1023, 976 and 729 cm<sup>-1</sup>; <sup>1</sup>H NMR (CDCl<sub>3</sub>, 400 MHz, major isomer)  $\delta$  8.05 (2H, dd,  $J$  = 8.0, 0.8 Hz), 7.65-7.54 (2H, m), 7.52-7.48 (2H, m), 7.29-7.25 (1H, m), 7.20-7.17 (1H, m), 7.15-7.09 (1H, m), 6.99 (1H, br s, NH), 5.05-4.7 (4H, m), 3.97-3.84 (2H, m, OCH<sub>2</sub>CH<sub>3</sub>), 1.57 (9H, s, OC(CH<sub>3</sub>)<sub>3</sub>), 0.92 (3H, t,  $J$  = 7.2 Hz, OCH<sub>2</sub>CH<sub>3</sub>); <sup>13</sup>C NMR (CDCl<sub>3</sub>, DEPT-135, major isomer)  $\delta$  193.5 (C, C=O), 167.4 (C, O-C=O), 154.2 (C, O-C=O), 136.3 (C), 135.8 (C), 134.3 (CH), 130.0 (C), 129.0 (2 x CH), 128.9 (2 x CH), 128.7 (CH), 126.9 (CH), 126.5 (CH), 125.7 (CH), 80.6 (C), 77.3 (CH<sub>2</sub>), 62.2 (CH<sub>2</sub>, OCH<sub>2</sub>CH<sub>3</sub>), 56.7 (CH), 35.9 (CH), 28.3 (3 x CH<sub>3</sub>, OC(CH<sub>3</sub>)<sub>3</sub>), 13.5 (CH<sub>3</sub>, OCH<sub>2</sub>CH<sub>3</sub>); HRMS  $m/z$  479.1796 (M + Na), calcd for C<sub>24</sub>H<sub>28</sub>N<sub>2</sub>O<sub>7</sub>Na 479.1795.

**(R)-Isopropyl 1-((S)-2-nitro-1-phenylethyl)-2-oxocyclopentanecarboxylate (4hb):**

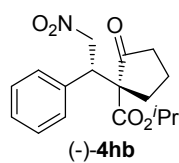

Prepared by following the procedure [A](#) and purified by column chromatography using EtOAc/hexane and isolated as oil. The enantiomeric excess (*ee*) was determined by chiral stationary phase HPLC using a Lux 5u Cellulose-2 column (hexane/2-propanol = 95:5, flow rate 0.5 mL/min,  $\lambda$  = 220 nm),  $t_R$  = 29.91 min (minor),  $t_R$  = 39.68 min (major);  $[\alpha]_D^{25} = -25.4^\circ$  ( $c$  = 0.33 g/100 mL, CHCl<sub>3</sub>, 98% *ee*); IR (Neat):  $\nu_{\max}$  2975, 1715 (C=O), 1551 (NO<sub>2</sub>), 1457, 1375 (NO<sub>2</sub>), 1227, 1101, 1036 and 904 cm<sup>-1</sup>; <sup>1</sup>H NMR (CDCl<sub>3</sub>, 500 MHz)  $\delta$  7.33-7.26 (5H, m), 5.19 (1H, dd,  $J$  = 13.5, 4.0 Hz), 5.09-5.00 (2H, m), 4.07 (1H, dd,  $J$  = 11.0, 4.0 Hz), 2.39-2.33 (2H, m), 2.05-1.87 (4H, m), 1.26 (3H, d,  $J$  = 6.0 Hz, OCH(CH<sub>3</sub>)<sub>2</sub>), 1.25 (3H, d,  $J$  = 6.0 Hz, OCH(CH<sub>3</sub>)<sub>2</sub>); <sup>13</sup>C NMR (CDCl<sub>3</sub>, DEPT-135)  $\delta$  212.3 (C, C=O), 168.8 (C, O-C=O), 135.5 (C), 129.4 (2 x CH), 128.8 (2 x CH), 128.2 (CH), 76.5 (CH<sub>2</sub>), 70.1 (CH, OCH(CH<sub>3</sub>)<sub>2</sub>), 62.5 (C), 46.3 (CH), 37.8 (CH<sub>2</sub>), 31.4 (CH<sub>2</sub>), 21.6 (CH<sub>3</sub>, OCH(CH<sub>3</sub>)<sub>2</sub>), 21.4 (CH<sub>3</sub>, OCH(CH<sub>3</sub>)<sub>2</sub>), 19.3 (CH<sub>2</sub>); HRMS  $m/z$  342.1319 (M + Na), calcd for C<sub>17</sub>H<sub>21</sub>NO<sub>5</sub>Na 342.1318.

**(R)-Isopropyl 1-((S)-1-(3-((tert-butoxycarbonyl)amino)phenyl)-2-nitroethyl)-2-oxocyclopentane carboxylate (4ib):**

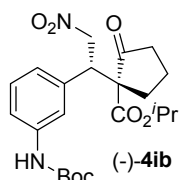

EtOAc/hexane and isolated as white solid. Mp 103-105 °C; The enantiomeric excess (*ee*) was determined by chiral stationary phase HPLC using a Daicel Chiralpak AD-H column (hexane/2-propanol = 90:10, flow rate 0.8 mL/min,  $\lambda$  = 254 nm),  $t_R$  = 10.76 min (minor),  $t_R$  = 12.40 min (major);  $[\alpha]_D^{25} = -18.5^\circ$  ( $c$  = 0.28 g/100 mL, CHCl<sub>3</sub>, 99% *ee*); IR (KBr):  $\nu_{\max}$  3397 (N-H), 2981, 1731 (C=O), 1540 (NO<sub>2</sub>), 1441, 1381 (NO<sub>2</sub>), 1238, 1156, 1041 and 860 cm<sup>-1</sup>; <sup>1</sup>H NMR (CDCl<sub>3</sub>, 500 MHz)  $\delta$  7.37 (1H, br d,  $J$  = 7.5 Hz), 7.25 (1H, s), 7.23 (1H, t,  $J$  = 8.0 Hz), 6.95 (1H, d,  $J$  = 7.5 Hz), 6.50 (1H, br s, NH), 5.18 (1H, dd,  $J$  = 13.5, 3.5 Hz), 5.08 (1H, septet,  $J$  = 6.5 Hz), 5.01 (1H, dd,  $J$  = 13.5, 11.0 Hz), 4.02 (1H, dd,  $J$  = 11.0, 3.5 Hz), 2.41-2.36 (2H, m), 2.09 (1H, dd,  $J$  = 18.5, 9.5 Hz), 2.05-1.97 (1H, m), 1.96-1.92 (1H, m), 1.91-1.82 (1H, m), 1.53 (9H, s, OC(CH<sub>3</sub>)<sub>3</sub>), 1.27 (3H, d,  $J$  = 6.5 Hz, OCH(CH<sub>3</sub>)<sub>2</sub>), 1.26 (3H, d,  $J$  = 6.5 Hz, OCH(CH<sub>3</sub>)<sub>2</sub>); <sup>13</sup>C NMR (CDCl<sub>3</sub>, DEPT-135)  $\delta$  212.4 (C, C=O), 168.8 (C, O-C=O), 152.5 (C, O-C=O), 138.8 (C), 136.6 (C), 129.4 (CH), 123.7 (CH), 119.4 (CH), 118.2 (CH), 80.7 (C), 76.5 (CH<sub>2</sub>), 70.1 (CH, OCH(CH<sub>3</sub>)<sub>2</sub>), 62.4 (C), 46.2 (CH), 37.8 (CH<sub>2</sub>), 31.5 (CH<sub>2</sub>), 28.3 (3 x CH<sub>3</sub>, OC(CH<sub>3</sub>)<sub>3</sub>), 21.6 (CH<sub>3</sub>, OCH(CH<sub>3</sub>)<sub>2</sub>), 21.4 (CH<sub>3</sub>, OCH(CH<sub>3</sub>)<sub>2</sub>), 19.4 (CH<sub>2</sub>); HRMS  $m/z$  457.1952 (M + Na), calcd for C<sub>22</sub>H<sub>30</sub>N<sub>2</sub>O<sub>7</sub>Na 457.1951.

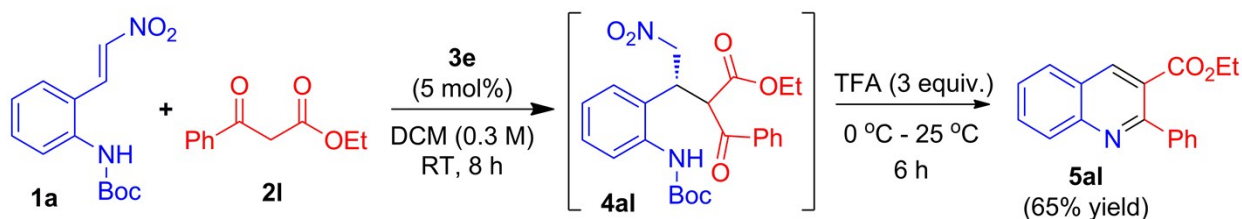

**Ethyl 2-phenylquinoline-3-carboxylate (5a):** Prepared by following the procedure **B** and purified by

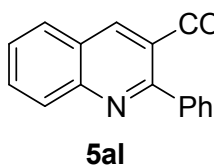

column chromatography using EtOAc/hexane and isolated as oil. IR (Neat):  $\nu_{\max}$  2926, 1715 (C=O), 1594, 1485, 1370, 1101, 1036, 767 and 696  $\text{cm}^{-1}$ ;  $^1\text{H}$  NMR ( $\text{CDCl}_3$ , 500 MHz)  $\delta$  8.68 (1H, s), 8.21 (1H, d,  $J$  = 8.5 Hz), 7.95 (1H, d,  $J$  = 8.0 Hz), 7.86-7.82 (1H, m), 7.66-7.61 (3H, m), 7.51-7.46 (3H, m), 4.21 (2H, q,  $J$  = 7.0 Hz,  $\text{OCH}_2\text{CH}_3$ ), 1.10 (3H, t,  $J$  = 7.0 Hz,  $\text{OCH}_2\text{CH}_3$ );  $^{13}\text{C}$  NMR ( $\text{CDCl}_3$ , DEPT-135)  $\delta$  168.0 (C, O-C=O), 158.2 (C), 148.4 (C), 140.8 (C), 139.1 (CH), 131.6 (CH), 129.5 (CH), 128.6 (3 x CH), 128.25 (CH), 128.22 (2 x CH), 127.3 (CH), 125.9 (C), 125.5 (C), 61.6 ( $\text{CH}_2$ ,  $\text{OCH}_2\text{CH}_3$ ), 13.7 ( $\text{CH}_3$ ,  $\text{OCH}_2\text{CH}_3$ ); LRMS  $m/z$  278.15 ( $\text{M} + \text{H}^+$ ), calcd for  $\text{C}_{18}\text{H}_{15}\text{NO}_2$  277.1103.

**(R)-Ethyl 1-((S)-1-(2-((tert-butoxycarbonyl)amino)phenyl)-2-nitroethyl)-2-oxocyclohexane**

**carboxylate (4ad'):** Prepared by following the procedure **A** and purified by column chromatography

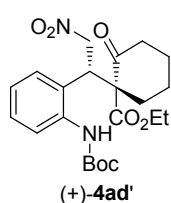

using EtOAc/hexane and isolated as oil. The enantiomeric excess ( $ee$ ) was determined by chiral stationary phase HPLC using a Daicel Chiralpak ID-H column (hexane/2-propanol = 90:10, flow rate 0.5 mL/min,  $\lambda$  = 254 nm),  $t_R$  = 29.9 min (major),  $t_R$  = 36.8 min (minor);  $[\alpha]_D^{25}$  = +42.8° ( $c$  = 0.30 g/100 mL,  $\text{CHCl}_3$ , >99%  $ee$  and >99%  $de$ ); IR (Neat):  $\nu_{\max}$  3364 (N-H), 2970, 1709 (C=O), 1556 ( $\text{NO}_2$ ), 1463, 1375 ( $\text{NO}_2$ ), 1227, 1156, 1019 and 762  $\text{cm}^{-1}$ ;  $^1\text{H}$  NMR ( $\text{CDCl}_3$ , 500 MHz)  $\delta$  7.52 (1H, br s), 7.27 (1H, t,  $J$  = 8.0 Hz), 7.13 (1H, t,  $J$  = 8.0 Hz), 7.07 (1H, br d,  $J$  = 7.5 Hz), 6.73 (1H, br s, NH), 5.14 (1H, dd,  $J$  = 14.5, 3.0 Hz), 4.70 (1H, dd,  $J$  = 14.5, 11.0 Hz), 4.46 (1H, dd,  $J$  = 11.0, 3.0 Hz), 4.26 (2H, q,  $J$  = 7.0 Hz,  $\text{OCH}_2\text{CH}_3$ ), 2.53-2.50 (1H, m), 2.44-2.38 (1H, m), 2.14 (1H, dd,  $J$  = 14.0, 2.0 Hz), 2.03-2.01 (1H, m), 1.70-1.68 (1H, m), 1.64-1.57 (2H, m), 1.52 (9H, s,  $\text{OC}(\text{CH}_3)_3$ ), 1.42-1.37 (1H, m), 1.28 (3H, t,  $J$  = 7.0 Hz,  $\text{OCH}_2\text{CH}_3$ );  $^{13}\text{C}$  NMR ( $\text{CDCl}_3$ , DEPT-135)  $\delta$  207.2 (C, C=O), 169.7 (C, O-C=O), 154.0 (C, O-C=O), 137.0 (C), 129.5 (C), 128.5 (CH), 127.4 (CH), 126.9 (CH), 125.6 (CH), 80.4 (C), 77.5 ( $\text{CH}_2$ ), 63.0 (C), 62.2 ( $\text{CH}_2$ ,  $\text{OCH}_2\text{CH}_3$ ), 41.4 ( $\text{CH}_2$ ), 39.3 (CH), 35.9 ( $\text{CH}_2$ ), 28.3 (3 x  $\text{CH}_3$ ,  $\text{OC}(\text{CH}_3)_3$ ), 27.9 ( $\text{CH}_2$ ), 22.3 ( $\text{CH}_2$ ), 14.0 ( $\text{CH}_3$ ,  $\text{OCH}_2\text{CH}_3$ ); HRMS  $m/z$  452.2397 ( $\text{M} + \text{NH}_4^+$ ), calcd for  $\text{C}_{22}\text{H}_{34}\text{N}_3\text{O}_7$  452.2397.

## References:

[1] For the synthesis of substituted 2-(2-nitrovinyl)anilines **1a-j**, see: Y. Lee, S. -G. Kim, *J. Org. Chem.* **2014**, 79, 8234–8243.
